# Supplementary material for: Climate and atmospheric history of the past 420,000 years from the Vostok ice core, Antarctica
Source: Springer Nature journal article supplement (doi:10.1038/20859), 1999-06-01
Supplement: 41586_1999_BF20859_MOESM1_ESM.pdf [file 41586_1999_BF20859_MOESM1_ESM.pdf]

## Vostok ice records: comments on data :

update: April, 1999

Supplementary information of the paper PO1256: "Climate and Atmospheric History of the Past 420 000 years from the Vostok Ice Core, Antarctica, by Petit et al., submitted to *Nature*. Files content: "GT4" ice core chronology (gas and ice chronology), Deuterium and reconstructed temperature , Dust content, Sodium concentrations, CO<sub>2</sub>, CH<sub>4</sub>, atmospheric oxygen composition. .

### Vostok time scales : file "GT4"

Column 1: depth (m)

Column 2: Age of the ice (GT4 chronology)

Column 3: Gas Age as deduced from the Barnola et al. (1991) model.

### Deuterium - data : file « deutnat.txt »

Column 1 -Depth (m)

Column 2 -Ice Age (GT4)

Column 3 -Deuterium content in ‰ SMOW (Standard Mean Ocean Sea Water). Deuterium measurements have been performed on three adjacent cores 3G, 4G and 5G (see Figure 1 of Jouzel et al., 1996). It combines results successively published in Jouzel et al. (1987, 1993 and 1996).

Column 4 -Temperature difference wrt the mean recent time value (i.e. corresponding departure from -438 ‰ mean deuterium value)

Deuterium data is from core 3G between 138 and 2083 meters below surface (mbs) (with one long missing section between 312 and 320 mbs), from core 4G between 8 and 138 mbs and between 1920 and 2546 mbs and from core 5G between 2504 and 2757 mbs. Ash layers help to make link between cores. No correction was applied for 3G and 4G core taken as reference depth. For 5G samples, a value of 3.41 m have been added to the depth measured in the field below depth of 2500 m.

Deuterium values (**column 3**) have been measured on ice samples of length comprised between 0.5 and 2 m (down to 2080 m) then every 1 m. Data was re-interpolated on 1m intervals afterwards. The ice recovery is 85% or higher. Measurement accuracy is of  $\pm 0.5\text{‰}$  SMOW (1  $\sigma$ ). From the surface down to 7 m a constant value (derived from surface and pits samples) of - 438.0 ‰ is reported .

The temperature change indicated in **column 4** (temperature above the inversion). This temperature is calculated using a deuterium / temperature gradient of  $9\text{‰}/^{\circ}\text{C}$  after accounting for the isotopic change of sea-water. No correction for the influence of the geographical position of the ice was applied.

### Dust content: file "dustnat.txt"

Column 1 -Depth (m): 3.41 m have been added to the depth for 5G samples (below 2500 m).

Column 2 -Ice Age (GT4)

Column 3 – dust concentration in ppm

The dust concentration was calculated from the total volume concentration (from Coulter counter measurements), and assuming a dust density of 2.500 Kg. m<sup>-3</sup>. Data from Petit et al (1990), Jouzel et al. (1993) down to 2545 m depth have been included.

**Sodium content** file “nanat.txt”

Column 1: depth (m) 3.41 m have been added to the depth for 5G samples (below 2500 m).

Column 2: Age of the ice (GT4 chronology)

Column 3: Sodium concentration (ppb)

Data from Legrand et al.(1988) ,down to 2080 m have been included.

**CH4 data:** file”ch4nat.txt”

Column 1: depth (m) 3.41 m have been added to the depth for 5G samples (below 2500 m).

Column 2: Age of the ice (GT4 chronology)

Column 3: Gas Age as deduced from the Barnola et al. (1991) model

Column 4: CH4 concentration (ppbv). See note below

**CO2 data:** file”co2nat.txt”

Column 1: depth (m) 3.41 m have been added to the depth for 5G samples (below 2500 m).

Column 2: Age of the ice (GT4 chronology)

Column 3: Gas Age as deduced from the Barnola et al. (1991) model

Column 4: CO2 concentration (ppmv).

CO<sub>2</sub> and CH<sub>4</sub> measurements have been performed using the methods and analytical procedures previously described (Barnola et al., 1987, Chappellaz et al, 1990). However, the CO<sub>2</sub> measuring system has been slightly modified in order to increase the sensitivity of the CO<sub>2</sub> detection. The thermal conductivity chromatographic detector has been replaced by a flame ionisation detector which measures CO<sub>2</sub> after its transformation into CH<sub>4</sub>. The overall accuracy for CH<sub>4</sub> and CO<sub>2</sub> measurements are ± 20 ppbv and 2-3 ppmv respectively. No gravitational correction has been applied.

**Atmospheric Oxygen** : file “o18nat.txt”

Column 1: depth (m) 3.41 m have been added to the depth for 5G samples (below 2500 m).

Column 2: Age of the ice (GT4 chronology)

Column 3: Gas Age as deduced from the Barnola et al. (1991) model

Column 4:  $\delta^{18}\text{O}_{\text{atm}}$  ‰

$\delta^{18}\text{O}_{\text{atm}}$  data published in Sowers et al.(1993) and Jouzel et al.(1993) have been included.

### References

Barnola, J.M., Raynaud, D., Korotkevich, Y.S. & Lorius, C. Vostok ice core provides 160,000-year record of atmospheric  $\text{CO}_2$ . *Nature*, **329**, 408-414 (1987).

Barnola, J.M., Pimienta, P., Raynaud, D. & Korotkevich, Y.S.  $\text{CO}_2$  climate relationship as deduced from the Vostok ice core : a re-examination based on new measurements and on a re-evaluation of the air dating. *Tellus*, **43B**, 83-91 (1991).

Chappellaz, J., Barnola, J.-M., Raynaud, D., Korotkevich, Y.S. & Lorius, C. Ice -core record of atmospheric methane over the past 160,000 years. *Nature*, **345**, 127-131 (1990).

Jouzel J., C. Lorius, J. R. Petit, C. Genthon, N. I. Barkov, V. M. Kotlyakov and V. M. Petrov, Vostok ice core: a continuous isotope temperature record over the last climatic cycle (160,000 years), *Nature*, **329**, **1987**, 402-408.

Jouzel J., N. I. Barkov, J. M. Barnola, M. Bender, J. Chappelaz, C. Genthon, V. M. Kotlyakov, V. Lipenkov, C. Lorius, J. R. Petit, D. Raynaud, G. Raisbeck, C. Ritz, T. Sowers, M. Stievenard, F. Yiou and P. Yiou, Extending the Vostok ice-core record of paleoclimate to the penultimate glacial period, *Nature*, **364**, **1993**, 407-412.

Jouzel J., C. Waelbroeck, B. Malaizé, M. Bender, J. R. Petit, N. I. Barkov, J. M. Barnola, T. King, V. M. Kotlyakov, V. Lipenkov, C. Lorius, D. Raynaud, C. Ritz and T. Sowers, Climatic interpretation of the recently extended Vostok ice records, *Clim.Dyn.*, **12**,**1996**, 513-521.

Legrand M., C. Lorius, N.I. Barkov, V.N. Petrov: Vostok (Antarctica) ice core: atmospheric chemistry changes over the last climatic cycle (160,000 years), *Atmos. Environ.* **1988**, **22**, 317-331.

Lorius C., J. Jouzel, C. Ritz, L. Merlivat, N. I. Barkov, Y. S. Korotkevitch and V. M. Kotlyakov, A 150,000-year climatic record from Antarctic ice, *Nature*, **316**, **1985**, 591-596.

Petit J.R., L. Mounier, J. Jouzel, Y. Korotkevitch, V. Kotlyakov and C. Lorius, Paleoclimatological implications of the Vostok core dust record, *Nature*, **343**, **1990**, 56-58.

Petit J.R., Jouzel J., Raynaud D., Barkov N.I., Barnola J.M., Basile I., Bender M., Chappellaz J., Davis J. , Delaygue G., Delmotte M., Kotlyakov V.M., Legrand M., Lipenkov V., M., Lorius C., Pépin L., Ritz C., Saltzman E., Stievenard M. Climate and Atmospheric History of the Past 420 000 years from the Vostok Ice Core, Antarctica, *Nature* (this paper)

Sowers T. M. Bender, L. D. Labeyrie, J. Jouzel, D. Raynaud, D. Martinson and Y. S. Korotkevich, 135 000 year Vostok - SPECMAP common temporal framework., *Paleoceanogr.*, **8**, **1993**, p. 737-766.

| Depth | corrected | Ice age (GT4) | o18nat<br>gas age (GT4) | Atm O18 |
|-------|-----------|---------------|-------------------------|---------|
| 114.8 | 4095      | 724           | -0.06                   |         |
| 116.3 | 4168      | 813           | 0.03                    |         |
| 120.3 | 4352      | 987           | -0.06                   |         |
| 125.2 | 4561      | 1184          | -0.02                   |         |
| 130.1 | 4791      | 1418          | 0.08                    |         |
| 135.3 | 5039      | 1675          | 0.04                    |         |
| 139.7 | 5245      | 1932          | -0.05                   |         |
| 139.8 | 5250      | 1935          | 0.14                    |         |
| 143.7 | 5429      | 2108          | -0.09                   |         |
| 149.6 | 5702      | 2370          | -0.05                   |         |
| 152.8 | 5854      | 2541          | -0.09                   |         |
| 156.9 | 6048      | 2745          | -0.08                   |         |
| 161.8 | 6279      | 3041          | -0.11                   |         |
| 165.1 | 6441      | 3214          | -0.13                   |         |
| 166.8 | 6526      | 3306          | -0.05                   |         |
| 169.7 | 6665      | 3453          | -0.15                   |         |
| 174.2 | 6884      | 3679          | 0.06                    |         |
| 174.6 | 6905      | 3695          | -0.14                   |         |
| 177.1 | 7028      | 3814          | 0.04                    |         |
| 184.3 | 7379      | 4262          | 0.15                    |         |
| 184.9 | 7408      | 4299          | -0.19                   |         |
| 205.6 | 8403      | 5207          | -0.18                   |         |
| 213.1 | 8768      | 5529          | -0.13                   |         |
| 213.8 | 8801      | 5559          | -0.2                    |         |
| 224   | 9298      | 6009          | -0.24                   |         |
| 230   | 9589      | 6278          | -0.05                   |         |
| 230.4 | 9608      | 6293          | -0.11                   |         |
| 250   | 10564     | 7313          | 0.1                     |         |
| 252.9 | 10711     | 7475          | -0.21                   |         |
| 270.8 | 11579     | 8285          | 0.04                    |         |
| 271.3 | 11606     | 8318          | 0.06                    |         |
| 280.2 | 12099     | 8808          | 0.04                    |         |
| 280.9 | 12139     | 8856          | -0.11                   |         |
| 281.3 | 12161     | 8879          | -0.38                   |         |
| 290.4 | 12719     | 9443          | 0.24                    |         |
| 291.3 | 12773     | 9503          | 0.33                    |         |
| 294.5 | 12964     | 9655          | 0.25                    |         |
| 298.5 | 13208     | 9898          | 0.29                    |         |
| 299.5 | 13267     | 9952          | 0.24                    |         |
| 311.1 | 13944     | 10544         | 0.58                    |         |
| 311.6 | 13971     | 10570         | 0.32                    |         |
| 322.6 | 14627     | 11066         | 0.88                    |         |
| 322.8 | 14639     | 11073         | 0.93                    |         |
| 330.5 | 15133     | 11288         | 0.9                     |         |
| 336.7 | 15549     | 11499         | 0.72                    |         |
| 345.8 | 16185     | 11909         | 0.87                    |         |
| 355.9 | 16962     | 12609         | 1.11                    |         |
| 363.9 | 17618     | 13299         | 1.02                    |         |
| 372   | 18283     | 13850         | 1.21                    |         |
| 372.1 | 18291     | 13853         | 0.97                    |         |
| 383   | 19199     | 14302         | 1.06                    |         |
| 396.1 | 20286     | 14927         | 1.23                    |         |
| 400.2 | 20628     | 15123         | 0.91                    |         |
| 410.2 | 21459     | 15615         | 0.92                    |         |

|       |       |       |      |
|-------|-------|-------|------|
| 422.3 | 22483 | 16185 | 1.16 |
| 422.4 | 22491 | 16189 | 1.33 |
| 431.4 | 23270 | 16719 | 0.97 |
| 446.5 | 24579 | 17937 | 0.98 |
| 456.5 | 25402 | 18797 | 0.89 |
| 467.6 | 26310 | 19661 | 0.74 |
| 476.7 | 27079 | 20435 | 0.98 |
| 486.7 | 27969 | 21288 | 0.82 |
| 495.8 | 28752 | 21999 | 0.67 |
| 496.8 | 28832 | 22076 | 0.76 |
| 502.4 | 29282 | 22590 | 0.9  |
| 511.9 | 30114 | 23561 | 0.49 |
| 515.5 | 30411 | 23928 | 1.02 |
| 528   | 31473 | 25057 | 0.44 |
| 537.1 | 32227 | 25812 | 0.44 |
| 547.1 | 33047 | 26477 | 0.41 |
| 562   | 34281 | 27904 | 0.37 |
| 571.9 | 35024 | 28784 | 0.33 |
| 576.4 | 35366 | 29056 | 0.47 |
| 576.5 | 35374 | 29062 | 0.52 |
| 597.8 | 37049 | 30942 | 0.35 |
| 615.8 | 38518 | 32740 | 0.64 |
| 627.8 | 39483 | 34133 | 0.58 |
| 631.5 | 39774 | 34495 | 0.58 |
| 636.8 | 40205 | 34893 | 0.57 |
| 637.8 | 40291 | 34947 | 0.29 |
| 645.7 | 40930 | 35449 | 0.49 |
| 659.7 | 41977 | 36237 | 0.46 |
| 671.7 | 42892 | 37241 | 0.49 |
| 677.7 | 43359 | 37752 | 0.57 |
| 686.6 | 44086 | 38599 | 0.52 |
| 696.6 | 44939 | 39582 | 0.43 |
| 709.6 | 46070 | 41011 | 0.57 |
| 721.5 | 47092 | 41928 | 0.65 |
| 734.5 | 48176 | 42711 | 0.46 |
| 747.5 | 49233 | 43509 | 0.5  |
| 759.4 | 50169 | 44336 | 0.43 |
| 771.4 | 51117 | 45279 | 0.43 |
| 784.4 | 52146 | 46655 | 0.29 |
| 796.3 | 53133 | 47826 | 0.18 |
| 809.3 | 54224 | 49156 | 0.31 |
| 821.3 | 55243 | 50188 | 0.56 |
| 834.2 | 56254 | 51152 | 0.37 |
| 846.2 | 57154 | 51881 | 0.33 |
| 859.2 | 58148 | 52763 | 0.22 |
| 871.1 | 59101 | 53867 | 0.3  |
| 884.1 | 60185 | 55442 | 0.26 |
| 892.2 | 60887 | 56257 | 0.6  |
| 897.1 | 61326 | 56713 | 0.31 |
| 909   | 62401 | 57529 | 0.77 |
| 921   | 63512 | 58373 | 0.71 |
| 934   | 64698 | 59346 | 0.8  |
| 945.9 | 65847 | 60229 | 0.72 |
| 959.9 | 67169 | 61370 | 0.77 |
| 970.9 | 68222 | 62301 | 0.67 |

|        |        |        |       |
|--------|--------|--------|-------|
| 983.8  | 69393  | 63515  | 0.83  |
| 1020.5 | 72532  | 66581  | 0.77  |
| 1032.6 | 73589  | 67850  | 0.78  |
| 1045.6 | 74703  | 69299  | 0.71  |
| 1056.7 | 75602  | 70607  | 0.65  |
| 1069.8 | 76605  | 71543  | 0.56  |
| 1082.8 | 77674  | 72407  | 0.58  |
| 1095.9 | 78766  | 73689  | 0.42  |
| 1108   | 79714  | 74974  | 0.35  |
| 1121   | 80719  | 75937  | 0.31  |
| 1133.1 | 81599  | 76634  | 0.37  |
| 1146.2 | 82515  | 77505  | 0.14  |
| 1158.3 | 83352  | 78596  | 0.07  |
| 1171.3 | 84259  | 79753  | 0.02  |
| 1183.4 | 85062  | 80841  | -0.05 |
| 1196.5 | 85915  | 81826  | -0.03 |
| 1209.5 | 86812  | 82827  | -0.25 |
| 1221.6 | 87666  | 83681  | -0.21 |
| 1233.7 | 88548  | 84668  | 0.21  |
| 1234.7 | 88623  | 84733  | 0.13  |
| 1245.6 | 89419  | 85433  | 0.37  |
| 1246.8 | 89512  | 85498  | 0.05  |
| 1258.8 | 90423  | 86174  | 0.31  |
| 1284   | 92259  | 87755  | 0.26  |
| 1297   | 93180  | 88597  | 0.37  |
| 1309.1 | 94033  | 89355  | 0.23  |
| 1322.2 | 94946  | 90430  | 0.33  |
| 1334.2 | 95775  | 91475  | 0.43  |
| 1347.3 | 96673  | 92352  | 0.47  |
| 1358.4 | 97469  | 93181  | 0.56  |
| 1384.5 | 99310  | 95132  | 0.48  |
| 1408.7 | 100949 | 96632  | 0.41  |
| 1432.8 | 102476 | 98365  | 0.02  |
| 1444.9 | 103266 | 99254  | -0.11 |
| 1459   | 104266 | 100462 | -0.07 |
| 1473   | 105271 | 101636 | -0.11 |
| 1485.1 | 106121 | 102314 | -0.01 |
| 1496.2 | 106917 | 102869 | -0.14 |
| 1507.2 | 107784 | 103548 | -0.14 |
| 1512.3 | 108224 | 104017 | 0.06  |
| 1520.3 | 108897 | 104686 | 0.14  |
| 1529.3 | 109650 | 105444 | 0.33  |
| 1539.4 | 110459 | 106102 | 0.46  |
| 1551.5 | 111439 | 106686 | 0.44  |
| 1566.2 | 112644 | 107470 | 0.59  |
| 1592   | 114639 | 109824 | 0.73  |
| 1636.3 | 117593 | 113370 | 0.73  |
| 1656.1 | 118802 | 115226 | 0.39  |
| 1683.3 | 120457 | 117267 | 0.28  |
| 1693.1 | 121024 | 117891 | -0.07 |
| 1716.7 | 122384 | 119319 | -0.21 |
| 1732.7 | 123308 | 120424 | -0.19 |
| 1757   | 124654 | 121904 | -0.25 |
| 1784.3 | 126177 | 123521 | -0.34 |
| 1823.5 | 128186 | 125622 | -0.22 |

|        |        |        |       |
|--------|--------|--------|-------|
| 1831.9 | 128592 | 126162 | -0.21 |
| 1845.2 | 129284 | 127030 | 0.17  |
| 1858   | 129971 | 127752 | 0.27  |
| 1868.5 | 130554 | 128325 | 0.65  |
| 1882.3 | 131393 | 128995 | 1     |
| 1883.4 | 131465 | 129069 | 0.9   |
| 1907.6 | 133188 | 130379 | 1.13  |
| 1934.5 | 135557 | 131959 | 1.23  |
| 1954.6 | 137611 | 133340 | 1.21  |
| 1955.8 | 137733 | 133418 | 1.12  |
| 1965.5 | 138812 | 133941 | 1.16  |
| 1982.3 | 140689 | 135202 | 1.03  |
| 1990.8 | 141637 | 135994 | 0.86  |
| 2016.4 | 144496 | 138408 | 0.91  |
| 2058.8 | 149220 | 143362 | 0.59  |
| 2092.1 | 152863 | 147205 | 0.6   |
| 2104   | 154207 | 148765 | 0.74  |
| 2112.1 | 155163 | 149816 | 0.82  |
| 2132.2 | 157583 | 151981 | 0.98  |
| 2142   | 158702 | 153069 | 0.89  |
| 2161.1 | 160751 | 154894 | 0.88  |
| 2170   | 161776 | 156102 | 0.8   |
| 2191   | 164136 | 159270 | 0.87  |
| 2201.1 | 165412 | 160281 | 0.79  |
| 2222.4 | 168089 | 162810 | 0.66  |
| 2236.1 | 169649 | 163928 | 0.38  |
| 2254.1 | 171772 | 166309 | 0.09  |
| 2281.1 | 175045 | 169989 | 0.11  |
| 2293   | 176501 | 171357 | -0.13 |
| 2301   | 177517 | 172412 | -0.1  |
| 2312.2 | 178992 | 174181 | 0.04  |
| 2332   | 181382 | 176144 | -0.01 |
| 2341.1 | 182570 | 177430 | 0.24  |
| 2353.1 | 184243 | 179606 | 0.47  |
| 2372.1 | 186941 | 181627 | 0.88  |
| 2391.1 | 189582 | 184076 | 0.87  |
| 2404.5 | 191213 | 185778 | 0.72  |
| 2415.4 | 192560 | 187408 | 0.53  |
| 2425.6 | 193893 | 189454 | 0.47  |
| 2435.6 | 195126 | 190962 | 0.38  |
| 2444.1 | 196215 | 191858 | 0.12  |
| 2455.2 | 197612 | 193211 | -0.11 |
| 2465.2 | 198790 | 194611 | -0.03 |
| 2472.2 | 199590 | 195320 | -0.11 |
| 2492.2 | 201763 | 198189 | -0.14 |
| 2502.4 | 202870 | 199497 | -0.06 |
| 2509   | 203592 | 200370 | -0.15 |
| 2512.4 | 203979 | 200759 | 0.04  |
| 2514.8 | 204256 | 201104 | -0.02 |
| 2520.4 | 204903 | 201707 | 0.2   |
| 2520.8 | 204948 | 201751 | 0.03  |
| 2530.7 | 206189 | 202917 | 0.39  |
| 2531.7 | 206327 | 203049 | 0.15  |
| 2536.8 | 206995 | 203585 | 0.39  |
| 2546.4 | 208243 | 204656 | 0.66  |

|        |        |        |       |
|--------|--------|--------|-------|
| 2549.7 | 208659 | 204934 | 0.52  |
| 2554.8 | 209293 | 205426 | 0.51  |
| 2572.7 | 211450 | 207759 | 0.47  |
| 2586.7 | 213077 | 209691 | 0.35  |
| 2595.7 | 214103 | 210894 | 0.26  |
| 2607.7 | 215464 | 212419 | 0.06  |
| 2616.7 | 216523 | 213539 | -0.06 |
| 2625.7 | 217550 | 214611 | -0.12 |
| 2634.7 | 218639 | 215622 | -0.14 |
| 2644.7 | 219976 | 217045 | 0     |
| 2649.7 | 220719 | 217606 | 0.13  |
| 2658.7 | 222130 | 218640 | 0.05  |
| 2667.2 | 223642 | 219735 | 0.08  |
| 2677.2 | 225433 | 221031 | 0.14  |
| 2686.2 | 226975 | 222104 | 0.44  |
| 2692.2 | 228100 | 223181 | 0.51  |
| 2699.2 | 229392 | 224894 | 0.77  |
| 2706.2 | 230654 | 225994 | 0.84  |
| 2712.2 | 231682 | 226779 | 0.68  |
| 2718.2 | 232649 | 227928 | 0.65  |
| 2734.2 | 235013 | 231061 | 0.37  |
| 2736.2 | 235299 | 231478 | 0.27  |
| 2739.2 | 235722 | 232087 | 0.24  |
| 2743.2 | 236277 | 232849 | 0.09  |
| 2745.2 | 236545 | 233199 | -0.01 |
| 2763.9 | 238752 | 235990 | 0.03  |
| 2772.9 | 239913 | 237741 | 0.48  |
| 2778.9 | 240859 | 238490 | 0.76  |
| 2787.9 | 242559 | 239486 | 0.75  |
| 2796.9 | 244313 | 240495 | 0.62  |
| 2802.9 | 245599 | 241301 | 0.63  |
| 2811.9 | 247548 | 243128 | 0.84  |
| 2820.9 | 249542 | 244726 | 0.75  |
| 2828.9 | 251206 | 246382 | 0.63  |
| 2835.9 | 252757 | 247944 | 0.51  |
| 2844.9 | 254756 | 250337 | 0.45  |
| 2853.9 | 256735 | 252048 | 0.37  |
| 2859.9 | 258202 | 253691 | 0.47  |
| 2869.9 | 260776 | 255933 | 0.59  |
| 2877.9 | 262907 | 257646 | 0.69  |
| 2885.9 | 265028 | 259567 | 0.66  |
| 2891.9 | 266614 | 261142 | 0.66  |
| 2900.9 | 268897 | 263563 | 0.73  |
| 2909.9 | 271097 | 266106 | 0.56  |
| 2918.9 | 273148 | 268568 | 0.4   |
| 2924.9 | 274459 | 270247 | 0.2   |
| 2933.9 | 276388 | 272620 | 0     |
| 2942.9 | 278337 | 274784 | -0.15 |
| 2948.9 | 279752 | 276308 | -0.09 |
| 2957.9 | 282123 | 278250 | 0     |
| 2965.9 | 284181 | 279851 | -0.03 |
| 2971.9 | 285948 | 281656 | 0.09  |
| 2980.9 | 288387 | 283752 | 0.53  |
| 2989.9 | 290913 | 286629 | 0.6   |
| 2995.9 | 292475 | 288134 | 0.59  |



o18nat

|        |        |        |       |
|--------|--------|--------|-------|
| 3004.9 | 294900 | 291089 | 0.45  |
| 3013.9 | 297367 | 293273 | 0.25  |
| 3019.9 | 298989 | 295052 | -0.02 |
| 3028.9 | 301282 | 297568 | 0.02  |
| 3037.9 | 303533 | 300215 | 0.19  |
| 3043.9 | 305141 | 301918 | 0.26  |
| 3052.9 | 307880 | 304243 | 0.57  |
| 3061.9 | 310471 | 306589 | 0.59  |
| 3067.9 | 312072 | 308551 | 0.56  |
| 3076.9 | 314415 | 311344 | 0.38  |
| 3085.9 | 316647 | 313862 | 0.18  |
| 3091.9 | 318123 | 315533 | -0.03 |
| 3100.9 | 320329 | 317837 | -0.21 |
| 3109.9 | 322409 | 319956 | -0.16 |
| 3115.9 | 323676 | 321706 | 0.03  |
| 3124.9 | 325754 | 323802 | 0.77  |
| 3130.9 | 327565 | 325218 | 1.02  |
| 3142.9 | 332112 | 328540 | 1.12  |
| 3147.9 | 334555 | 330355 | 1.19  |
| 3154.9 | 337989 | 332841 | 1.21  |
| 3160.9 | 340942 | 336045 | 1.05  |
| 3163.9 | 342356 | 337494 | 0.92  |
| 3172.9 | 346772 | 342238 | 0.7   |
| 3178.9 | 349884 | 345278 | 0.67  |
| 3184.9 | 353220 | 348373 | 0.68  |
| 3190.9 | 356559 | 351525 | 0.67  |
| 3196.9 | 359819 | 355044 | 0.63  |
| 3199.9 | 361384 | 356764 | 0.41  |
| 3208.9 | 366230 | 361967 | 0.07  |
| 3211.9 | 367764 | 363534 | 0.11  |
| 3220.9 | 372699 | 368878 | 0.23  |
| 3226.9 | 376115 | 371710 | 0.33  |
| 3232.9 | 379228 | 375539 | 0.15  |
| 3238.9 | 382590 | 378831 | 0.39  |
| 3244.9 | 385814 | 382627 | 0.35  |
| 3250.9 | 389631 | 385590 | 0.65  |
| 3259.9 | 395516 | 391478 | 0.52  |
| 3268.9 | 400502 | 397554 | 0.55  |
| 3274.9 | 403775 | 401044 | 0.38  |
| 3277.9 | 405354 | 402666 | 0.24  |
| 3284.9 | 408947 | 406607 | 0.02  |
| 3290.9 | 411959 | 409860 | -0.08 |
| 3296.9 | 415188 | 412938 | 0.02  |
| 3299.9 | 416824 | 414603 | -0.06 |

| depth | corrected | Ice age (GT4) | dustnat<br>Dust Conc (ppm) |
|-------|-----------|---------------|----------------------------|
| 124   | 4509      | 0.025         |                            |
| 125   | 4552      | 0.018         |                            |
| 128   | 4690      | 0.015         |                            |
| 140   | 5259      | 0.033         |                            |
| 149   | 5674      | 0.028         |                            |
| 166   | 6486      | 0.013         |                            |
| 174   | 6874      | 0.020         |                            |
| 175   | 6924      | 0.018         |                            |
| 182   | 7267      | 0.038         |                            |
| 191   | 7697      | 0.023         |                            |
| 192   | 7745      | 0.065         |                            |
| 199   | 8091      | 0.038         |                            |
| 220   | 9107      | 0.040         |                            |
| 224   | 9298      | 0.050         |                            |
| 244   | 10265     | 0.018         |                            |
| 249   | 10515     | 0.030         |                            |
| 256   | 10861     | 0.033         |                            |
| 260   | 11053     | 0.045         |                            |
| 274   | 11749     | 0.050         |                            |
| 278   | 11973     | 0.025         |                            |
| 288   | 12569     | 0.075         |                            |
| 296   | 13055     | 0.075         |                            |
| 299   | 13237     | 0.040         |                            |
| 309   | 13828     | 0.033         |                            |
| 319   | 14404     | 0.085         |                            |
| 324   | 14713     | 0.163         |                            |
| 325   | 14775     | 0.180         |                            |
| 329   | 15032     | 0.170         |                            |
| 349   | 16426     | 0.638         |                            |
| 350   | 16502     | 0.773         |                            |
| 352   | 16653     | 0.320         |                            |
| 363   | 17544     | 1.098         |                            |
| 374   | 18446     | 0.220         |                            |
| 379   | 18870     | 1.210         |                            |
| 399   | 20528     | 0.973         |                            |
| 402   | 20777     | 0.710         |                            |
| 403   | 20859     | 1.735         |                            |
| 417   | 22023     | 0.733         |                            |
| 424   | 22629     | 1.213         |                            |
| 433   | 23412     | 1.745         |                            |
| 447   | 24619     | 1.573         |                            |
| 449   | 24781     | 0.668         |                            |
| 451   | 24941     | 0.450         |                            |
| 460   | 25697     | 0.968         |                            |
| 474   | 26849     | 1.480         |                            |
| 475   | 26933     | 1.353         |                            |
| 492   | 28420     | 0.510         |                            |
| 499   | 29006     | 0.415         |                            |
| 500   | 29085     | 0.365         |                            |
| 502   | 29249     | 0.783         |                            |
| 524   | 31130     | 0.708         |                            |
| 549   | 33209     | 0.495         |                            |
| 574   | 35185     | 0.090         |                            |
| 575   | 35261     | 0.113         |                            |

Porters South  
 4-6 Crinan Street  
 London N1 9XW  
 Tel: +44 (0)171 833 4000  
 Fax: +44 (0)171 843 4596/7  
 email: nature@nature.com

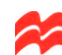

dustnat

# nature

Porters South  
4-6 Crinan Street  
London N1 9XW

Tel: +44 (0)171 833 4000  
Fax: +44 (0)171 843 4596/7  
email: nature@nature.com

|      |       |       |
|------|-------|-------|
| 598  | 37066 | 0.490 |
| 599  | 37148 | 0.603 |
| 601  | 37313 | 0.293 |
| 624  | 39185 | 0.203 |
| 625  | 39263 | 0.220 |
| 649  | 41191 | 0.188 |
| 650  | 41268 | 0.210 |
| 674  | 43073 | 0.238 |
| 675  | 43150 | 0.185 |
| 698  | 45055 | 0.190 |
| 699  | 45139 | 0.468 |
| 700  | 45225 | 0.375 |
| 724  | 47295 | 0.280 |
| 749  | 49350 | 0.128 |
| 750  | 49430 | 0.208 |
| 774  | 51306 | 0.073 |
| 775  | 51384 | 0.150 |
| 777  | 51549 | 0.295 |
| 799  | 53355 | 0.190 |
| 800  | 53436 | 0.165 |
| 802  | 53606 | 0.155 |
| 823  | 55377 | 0.278 |
| 824  | 55457 | 0.205 |
| 848  | 57289 | 0.210 |
| 849  | 57362 | 0.145 |
| 873  | 59262 | 0.833 |
| 874  | 59345 | 0.468 |
| 898  | 61406 | 0.475 |
| 899  | 61496 | 0.378 |
| 923  | 63688 | 0.980 |
| 924  | 63776 | 0.708 |
| 948  | 66045 | 1.100 |
| 949  | 66144 | 0.748 |
| 955  | 66708 | 0.425 |
| 973  | 68424 | 1.285 |
| 974  | 68520 | 0.860 |
| 984  | 69413 | 0.328 |
| 993  | 70243 | 0.305 |
| 998  | 70683 | 0.160 |
| 999  | 70766 | 0.063 |
| 1005 | 71264 | 0.085 |
| 1015 | 72070 | 0.098 |
| 1023 | 72753 | 0.155 |
| 1024 | 72840 | 0.053 |
| 1034 | 73706 | 0.190 |
| 1041 | 74322 | 0.205 |
| 1048 | 74903 | 0.063 |
| 1049 | 74985 | 0.103 |
| 1073 | 76854 | 0.073 |
| 1074 | 76933 | 0.075 |
| 1098 | 78937 | 0.178 |
| 1099 | 79020 | 0.233 |
| 1123 | 80869 | 0.280 |
| 1124 | 80943 | 0.193 |
| 1144 | 82352 | 0.078 |

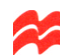

dustnat

# nature

Porters South  
4-6 Crinan Street  
London N1 9XW

Tel: +44 (0)171 833 4000  
Fax: +44 (0)171 843 4596/7  
email: nature@nature.com

|      |        |       |
|------|--------|-------|
| 1148 | 82647  | 0.188 |
| 1149 | 82721  | 0.223 |
| 1173 | 84378  | 0.068 |
| 1174 | 84448  | 0.058 |
| 1198 | 86016  | 0.065 |
| 1199 | 86083  | 0.078 |
| 1223 | 87766  | 0.090 |
| 1224 | 87837  | 0.090 |
| 1248 | 89597  | 0.190 |
| 1249 | 89672  | 0.208 |
| 1273 | 91480  | 0.113 |
| 1274 | 91547  | 0.120 |
| 1298 | 93254  | 0.270 |
| 1299 | 93325  | 0.238 |
| 1323 | 95000  | 0.070 |
| 1324 | 95070  | 0.103 |
| 1348 | 96722  | 0.048 |
| 1349 | 96791  | 0.043 |
| 1350 | 96861  | 0.053 |
| 1373 | 98505  | 0.075 |
| 1374 | 98572  | 0.068 |
| 1375 | 98640  | 0.005 |
| 1398 | 100232 | 0.170 |
| 1399 | 100301 | 0.140 |
| 1423 | 101868 | 0.133 |
| 1424 | 101930 | 0.110 |
| 1448 | 103481 | 0.248 |
| 1449 | 103553 | 0.180 |
| 1450 | 103625 | 0.315 |
| 1451 | 103697 | 0.258 |
| 1473 | 105271 | 0.058 |
| 1474 | 105342 | 0.058 |
| 1475 | 105413 | 0.058 |
| 1498 | 107048 | 0.128 |
| 1499 | 107121 | 0.098 |
| 1500 | 107194 | 0.085 |
| 1523 | 109121 | 0.093 |
| 1524 | 109206 | 0.050 |
| 1525 | 109292 | 0.065 |
| 1548 | 111159 | 0.070 |
| 1549 | 111239 | 0.043 |
| 1550 | 111319 | 0.010 |
| 1573 | 113195 | 0.050 |
| 1574 | 113272 | 0.078 |
| 1575 | 113348 | 0.043 |
| 1582 | 113891 | 0.068 |
| 1591 | 114562 | 0.058 |
| 1598 | 115077 | 0.035 |
| 1599 | 115150 | 0.080 |
| 1606 | 115617 | 0.028 |
| 1616 | 116296 | 0.048 |
| 1623 | 116762 | 0.033 |
| 1624 | 116827 | 0.028 |
| 1625 | 116891 | 0.073 |
| 1632 | 117326 | 0.068 |

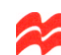

**Macmillan Magazines Ltd**

Registered Office:  
Brunel Road, Houndmills  
Basingstoke, Hampshire RG21 6XS  
Registered Number: 939565 England

dustnat

# nature

Porters South  
4-6 Crinan Street  
London N1 9XW

Tel: +44 (0)171 833 4000  
Fax: +44 (0)171 843 4596/7  
email: nature@nature.com

|      |        |       |
|------|--------|-------|
| 1635 | 117514 | 0.015 |
| 1643 | 118012 | 0.035 |
| 1648 | 118314 | 0.038 |
| 1649 | 118376 | 0.058 |
| 1655 | 118735 | 0.110 |
| 1665 | 119345 | 0.045 |
| 1673 | 119831 | 0.040 |
| 1674 | 119894 | 0.038 |
| 1675 | 119955 | 0.073 |
| 1682 | 120379 | 0.053 |
| 1692 | 120959 | 0.085 |
| 1698 | 121314 | 0.020 |
| 1699 | 121373 | 0.013 |
| 1709 | 121951 | 0.018 |
| 1716 | 122345 | 0.213 |
| 1723 | 122742 | 0.055 |
| 1724 | 122801 | 0.053 |
| 1732 | 123268 | 0.060 |
| 1739 | 123658 | 0.040 |
| 1749 | 124209 | 0.120 |
| 1756 | 124599 | 0.048 |
| 1761 | 124877 | 0.043 |
| 1768 | 125271 | 0.028 |
| 1783 | 126103 | 0.078 |
| 1798 | 126904 | 0.048 |
| 1799 | 126955 | 0.060 |
| 1800 | 127006 | 0.260 |
| 1816 | 127810 | 0.043 |
| 1823 | 128161 | 0.028 |
| 1824 | 128210 | 0.038 |
| 1825 | 128259 | 0.045 |
| 1830 | 128501 | 0.018 |
| 1848 | 129428 | 0.135 |
| 1849 | 129486 | 0.115 |
| 1850 | 129545 | 0.020 |
| 1866 | 130410 | 0.035 |
| 1872 | 130759 | 0.015 |
| 1873 | 130819 | 0.113 |
| 1874 | 130880 | 0.038 |
| 1875 | 130942 | 0.140 |
| 1879 | 131190 | 0.045 |
| 1883 | 131439 | 0.033 |
| 1886 | 131641 | 0.023 |
| 1890 | 131908 | 0.020 |
| 1895 | 132264 | 0.030 |
| 1898 | 132477 | 0.048 |
| 1899 | 132548 | 0.045 |
| 1900 | 132619 | 0.078 |
| 1901 | 132691 | 0.055 |
| 1902 | 132763 | 0.038 |
| 1903 | 132836 | 0.055 |
| 1906 | 133065 | 0.025 |
| 1907 | 133142 | 0.060 |
| 1912 | 133528 | 0.060 |
| 1919 | 134091 | 0.105 |

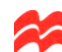

dustnat

# nature

Porters South  
4-6 Crinan Street  
London N1 9XW

Tel: +44 (0)171 833 4000  
Fax: +44 (0)171 843 4596/7  
email: nature@nature.com

|      |        |       |
|------|--------|-------|
| 1921 | 134266 | 0.095 |
| 1923 | 134447 | 0.500 |
| 1924 | 134538 | 0.120 |
| 1932 | 135308 | 0.298 |
| 1933 | 135408 | 0.095 |
| 1934 | 135507 | 0.105 |
| 1940 | 136103 | 0.160 |
| 1943 | 136411 | 0.123 |
| 1945 | 136614 | 0.245 |
| 1948 | 136923 | 0.883 |
| 1949 | 137026 | 0.860 |
| 1953 | 137446 | 0.158 |
| 1954 | 137549 | 0.183 |
| 1963 | 138532 | 0.288 |
| 1964 | 138644 | 0.235 |
| 1966 | 138868 | 0.553 |
| 1970 | 139308 | 0.338 |
| 1973 | 139643 | 0.848 |
| 1974 | 139756 | 0.498 |
| 1979 | 140319 | 0.405 |
| 1981 | 140542 | 0.553 |
| 1984 | 140876 | 0.688 |
| 1989 | 141434 | 0.245 |
| 1990 | 141547 | 0.438 |
| 1991 | 141661 | 0.303 |
| 1996 | 142218 | 0.565 |
| 1998 | 142440 | 1.010 |
| 1999 | 142551 | 0.753 |
| 2004 | 143117 | 0.625 |
| 2009 | 143675 | 0.740 |
| 2014 | 144237 | 0.460 |
| 2023 | 145226 | 0.973 |
| 2024 | 145337 | 0.673 |
| 2025 | 145449 | 0.738 |
| 2032 | 146242 | 0.528 |
| 2043 | 147459 | 0.423 |
| 2049 | 148141 | 0.770 |
| 2052 | 148471 | 0.158 |
| 2063 | 149679 | 0.265 |
| 2069 | 150333 | 0.550 |
| 2074 | 150868 | 0.418 |
| 2080 | 151502 | 0.325 |
| 2081 | 151611 | 0.318 |
| 2089 | 152513 | 0.313 |
| 2098 | 153523 | 0.871 |
| 2103 | 154094 | 0.305 |
| 2111 | 155029 | 1.177 |
| 2119 | 155983 | 1.228 |
| 2128 | 157080 | 0.671 |
| 2135 | 157909 | 0.715 |
| 2143 | 158815 | 0.426 |
| 2151 | 159651 | 0.130 |
| 2160 | 160626 | 0.237 |
| 2168 | 161545 | 0.728 |
| 2176 | 162440 | 0.238 |

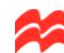

dustnat

# nature

Porters South  
4-6 Crinan Street  
London N1 9XW

Tel: +44 (0)171 833 4000  
Fax: +44 (0)171 843 4596/7  
email: nature@nature.com

|         |        |       |
|---------|--------|-------|
| 2184    | 163318 | 0.220 |
| 2191    | 164136 | 0.360 |
| 2199    | 165148 | 0.618 |
| 2202    | 165522 | 0.092 |
| 2208    | 166284 | 0.271 |
| 2217    | 167414 | 0.115 |
| 2225    | 168391 | 0.154 |
| 2232    | 169201 | 0.073 |
| 2241    | 170221 | 0.151 |
| 2248    | 171040 | 0.284 |
| 2256    | 172004 | 0.307 |
| 2264    | 173027 | 0.025 |
| 2272    | 173988 | 0.105 |
| 2280    | 174920 | 0.142 |
| 2287    | 175746 | 0.232 |
| 2294    | 176630 | 0.391 |
| 2308    | 178417 | 0.341 |
| 2325    | 180546 | 0.202 |
| 2325    | 180546 | 0.067 |
| 2333    | 181502 | 0.138 |
| 2342    | 182694 | 0.236 |
| 2348    | 183525 | 0.561 |
| 2356    | 184641 | 0.715 |
| 2364    | 185788 | 0.761 |
| 2373    | 187067 | 0.274 |
| 2387    | 189030 | 0.147 |
| 2398    | 190469 | 0.050 |
| 2400    | 190705 | 0.055 |
| 2404    | 191156 | 0.016 |
| 2410    | 191895 | 0.114 |
| 2414    | 192382 | 0.067 |
| 2420    | 193152 | 0.142 |
| 2425    | 193816 | 0.141 |
| 2430    | 194444 | 0.052 |
| 2434    | 194926 | 0.104 |
| 2440    | 195676 | 0.113 |
| 2444    | 196202 | 0.221 |
| 2451    | 197086 | 0.067 |
| 2454    | 197462 | 0.111 |
| 2459    | 198075 | 0.114 |
| 2462    | 198426 | 0.074 |
| 2471    | 199452 | 0.047 |
| 2473    | 199682 | 0.052 |
| 2475    | 199904 | 0.063 |
| 2477    | 200124 | 0.048 |
| 2479    | 200345 | 0.021 |
| 2491    | 201635 | 0.030 |
| 2502    | 202826 | 0.029 |
| 2505    | 203155 | 0.024 |
| 2505.41 | 203200 | 0.024 |
| 2508.41 | 203527 | 0.023 |
| 2509    | 203592 | 0.021 |
| 2512.41 | 203980 | 0.020 |
| 2515    | 204278 | 0.029 |
| 2515.41 | 204325 | 0.028 |

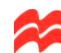

dustnat

# nature

Porters South  
4-6 Crinan Street  
London N1 9XW

Tel: +44 (0)171 833 4000  
Fax: +44 (0)171 843 4596/7  
email: nature@nature.com

|         |        |       |
|---------|--------|-------|
| 2521    | 204973 | 0.022 |
| 2524.41 | 205386 | 0.032 |
| 2525    | 205458 | 0.024 |
| 2527.41 | 205760 | 0.032 |
| 2531    | 206232 | 0.025 |
| 2531.41 | 206287 | 0.028 |
| 2534.41 | 206681 | 0.031 |
| 2537.41 | 207072 | 0.042 |
| 2540.41 | 207463 | 0.041 |
| 2543.41 | 207857 | 0.023 |
| 2545    | 208061 | 0.029 |
| 2546.41 | 208244 | 0.023 |
| 2549.41 | 208623 | 0.031 |
| 2555.41 | 209364 | 0.028 |
| 2559.41 | 209864 | 0.021 |
| 2564.41 | 210466 | 0.023 |
| 2568.41 | 210941 | 0.032 |
| 2569.41 | 211057 | 0.015 |
| 2574.41 | 211651 | 0.022 |
| 2576.41 | 211892 | 0.040 |
| 2579.41 | 212237 | 0.029 |
| 2583.41 | 212700 | 0.030 |
| 2585.41 | 212928 | 0.022 |
| 2597.41 | 214297 | 0.031 |
| 2600.41 | 214639 | 0.018 |
| 2603.41 | 214978 | 0.060 |
| 2607.41 | 215432 | 0.022 |
| 2612.41 | 216003 | 0.036 |
| 2612.41 | 216003 | 0.054 |
| 2615.41 | 216369 | 0.029 |
| 2619.41 | 216839 | 0.032 |
| 2629.41 | 217989 | 0.022 |
| 2634.41 | 218602 | 0.035 |
| 2637.41 | 219000 | 0.082 |
| 2640.41 | 219393 | 0.041 |
| 2642.41 | 219660 | 0.053 |
| 2646.41 | 220226 | 0.093 |
| 2651.41 | 220967 | 0.077 |
| 2653.41 | 221272 | 0.069 |
| 2660.41 | 222426 | 0.119 |
| 2664.41 | 223135 | 0.138 |
| 2667.41 | 223681 | 0.194 |
| 2670.41 | 224240 | 0.158 |
| 2674.41 | 224959 | 0.029 |
| 2677.41 | 225469 | 0.085 |
| 2680.41 | 225971 | 0.069 |
| 2684.41 | 226653 | 0.036 |
| 2691.41 | 227958 | 0.076 |
| 2694.41 | 228488 | 0.070 |
| 2697.41 | 229052 | 0.045 |
| 2701.41 | 229802 | 0.073 |
| 2703.41 | 230161 | 0.031 |
| 2706.41 | 230691 | 0.076 |
| 2715.41 | 232206 | 0.036 |
| 2715.41 | 232206 | 0.043 |

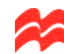



dustnat

# nature

Porters South  
4-6 Crinan Street  
London N1 9XW

Tel: +44 (0)171 833 4000  
Fax: +44 (0)171 843 4596/7  
email: nature@nature.com

|         |        |       |
|---------|--------|-------|
| 2718.41 | 232682 | 0.039 |
| 2719.41 | 232838 | 0.007 |
| 2721.41 | 233146 | 0.033 |
| 2721.41 | 233146 | 0.055 |
| 2723.41 | 233453 | 0.056 |
| 2733.41 | 234896 | 0.096 |
| 2736.41 | 235329 | 0.038 |
| 2748.41 | 236970 | 0.058 |
| 2751.41 | 237338 | 0.033 |
| 2754.41 | 237690 | 0.083 |
| 2756.41 | 237912 | 0.079 |
| 2762.41 | 238578 | 0.012 |
| 2765.41 | 238932 | 0.015 |
| 2768.41 | 239298 | 0.014 |
| 2771.41 | 239698 | 0.011 |
| 2774.41 | 240141 | 0.029 |
| 2777.41 | 240614 | 0.014 |
| 2780.41 | 241118 | 0.060 |
| 2780.41 | 241118 | 0.067 |
| 2783.41 | 241674 | 0.029 |
| 2786.41 | 242267 | 0.083 |
| 2789.41 | 242850 | 0.039 |
| 2792.41 | 243406 | 0.023 |
| 2795.41 | 243999 | 0.060 |
| 2797.41 | 244424 | 0.131 |
| 2797.41 | 244424 | 0.052 |
| 2798.41 | 244639 | 0.156 |
| 2801.41 | 245283 | 0.104 |
| 2807.41 | 246574 | 0.378 |
| 2816.41 | 248545 | 0.191 |
| 2819.41 | 249219 | 0.116 |
| 2825.41 | 250501 | 0.078 |
| 2828.41 | 251104 | 0.169 |
| 2834.41 | 252422 | 0.208 |
| 2837.41 | 253075 | 0.120 |
| 2840.41 | 253763 | 0.115 |
| 2846.41 | 255056 | 0.219 |
| 2849.41 | 255711 | 0.053 |
| 2852.41 | 256387 | 0.223 |
| 2858.41 | 257827 | 0.439 |
| 2864.41 | 259340 | 1.012 |
| 2868.41 | 260380 | 0.640 |
| 2871.41 | 261179 | 0.942 |
| 2874.41 | 261973 | 0.167 |
| 2878.41 | 263043 | 0.554 |
| 2883.41 | 264383 | 0.791 |
| 2888.41 | 265707 | 0.558 |
| 2897.41 | 268050 | 0.093 |
| 2903.41 | 269532 | 0.168 |
| 2907.41 | 270507 | 0.077 |
| 2913.41 | 271920 | 0.017 |
| 2918.41 | 273037 | 0.085 |
| 2922.41 | 273918 | 0.123 |
| 2928.41 | 275216 | 0.086 |
| 2937.41 | 277120 | 0.045 |

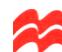

dustnat

# nature

Porters South  
4-6 Crinan Street  
London N1 9XW

Tel: +44 (0)171 833 4000  
Fax: +44 (0)171 843 4596/7  
email: nature@nature.com

|         |        |       |
|---------|--------|-------|
| 2943.41 | 278456 | 0.080 |
| 2948.41 | 279632 | 0.146 |
| 2954.41 | 281175 | 0.184 |
| 2958.41 | 282253 | 0.140 |
| 2968.41 | 284925 | 0.204 |
| 2974.41 | 286639 | 0.041 |
| 2978.41 | 287726 | 0.059 |
| 2981.41 | 288530 | 0.059 |
| 2987.41 | 290214 | 0.066 |
| 2993.41 | 291830 | 0.054 |
| 2998.41 | 293076 | 0.042 |
| 3001.41 | 293893 | 0.063 |
| 3005.41 | 295035 | 0.045 |
| 3008.41 | 295862 | 0.090 |
| 3017.41 | 298327 | 0.257 |
| 3021.41 | 299383 | 0.097 |
| 3025.41 | 300397 | 0.078 |
| 3028.41 | 301156 | 0.053 |
| 3031.41 | 301917 | 0.032 |
| 3034.41 | 302691 | 0.013 |
| 3035.41 | 302937 | 0.029 |
| 3038.41 | 303657 | 0.022 |
| 3044.41 | 305288 | 0.021 |
| 3047.41 | 306200 | 0.111 |
| 3050.41 | 307131 | 0.102 |
| 3053.41 | 308031 | 0.026 |
| 3056.41 | 308907 | 0.020 |
| 3058.41 | 309483 | 0.009 |
| 3061.41 | 310330 | 0.036 |
| 3065.41 | 311411 | 0.022 |
| 3068.41 | 312208 | 0.019 |
| 3077.41 | 314543 | 0.021 |
| 3080.41 | 315297 | 0.045 |
| 3085.41 | 316524 | 0.020 |
| 3086.41 | 316765 | 0.027 |
| 3088.41 | 317255 | 0.044 |
| 3091.41 | 317999 | 0.037 |
| 3098.41 | 319708 | 0.019 |
| 3107.41 | 321875 | 0.032 |
| 3110.41 | 322513 | 0.014 |
| 3118.41 | 324218 | 0.008 |
| 3124.41 | 325629 | 0.012 |
| 3128.41 | 326761 | 0.010 |
| 3131.41 | 327730 | 0.046 |
| 3137.41 | 329848 | 0.117 |
| 3140.41 | 331050 | 0.142 |
| 3147.41 | 334306 | 0.586 |
| 3148.41 | 334805 | 1.035 |
| 3152.41 | 336766 | 0.395 |
| 3155.41 | 338233 | 0.366 |
| 3158.41 | 339706 | 0.439 |
| 3161.41 | 341187 | 0.164 |
| 3164.41 | 342594 | 0.034 |
| 3172.41 | 346523 | 0.277 |
| 3178.41 | 349620 | 0.401 |

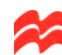

dustnat

nature

Porters South  
4-6 Crinan Street  
London N1 9XW

Tel: +44 (0)171 833 4000  
Fax: +44 (0)171 843 4596/7  
email: nature@nature.com

|         |        |       |
|---------|--------|-------|
| 3188.41 | 355187 | 0.380 |
| 3194.41 | 358466 | 0.240 |
| 3197.41 | 360071 | 0.155 |
| 3205.41 | 364333 | 0.076 |
| 3208.41 | 365962 | 0.268 |
| 3211.41 | 367507 | 0.058 |
| 3214.41 | 369034 | 0.091 |
| 3218.41 | 371188 | 0.224 |
| 3221.41 | 372991 | 0.208 |
| 3224.41 | 374711 | 0.071 |
| 3227.41 | 376381 | 0.085 |
| 3233.41 | 379524 | 0.019 |
| 3236.41 | 381227 | 0.125 |
| 3238.41 | 382318 | 0.033 |
| 3248.41 | 388065 | 0.122 |
| 3254.41 | 391928 | 0.114 |
| 3257.41 | 393908 | 0.157 |
| 3260.41 | 395792 | 0.023 |
| 3263.41 | 397482 | 0.023 |
| 3266.41 | 399134 | 0.019 |
| 3268.41 | 400228 | 0.021 |
| 3274.41 | 403501 | 0.033 |
| 3278.41 | 405617 | 0.016 |
| 3287.41 | 410200 | 0.018 |
| 3288.41 | 410683 | 0.012 |
| 3300.41 | 417095 | 0.013 |
| 3306.41 | 420527 | 0.015 |
| 3308.41 | 421761 | 0.012 |

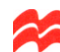

**Macmillan Magazines Ltd**

Registered Office:  
Brunel Road, Houndmills  
Basingstoke, Hampshire RG21 6XS  
Registered Number: 939565 England

|       |           |               | nanat    |
|-------|-----------|---------------|----------|
| depth | corrected | Ice age (GT4) | Na (ppb) |
| 4     | 72        | 12.48         |          |
| 7     | 129       | 65.37         |          |
| 9     | 170       | 30.31         |          |
| 11    | 211       | 24.26         |          |
| 13    | 258       | 21.47         |          |
| 19    | 397       | 37.25         |          |
| 21    | 444       | 22.55         |          |
| 22    | 469       | 33.63         |          |
| 24    | 523       | 25.58         |          |
| 26    | 581       | 38.08         |          |
| 29    | 665       | 39.3          |          |
| 31    | 726       | 22.84         |          |
| 33    | 788       | 19.43         |          |
| 35    | 848       | 25.52         |          |
| 37    | 912       | 43.26         |          |
| 39    | 976       | 19.35         |          |
| 42    | 1074      | 26.59         |          |
| 43    | 1107      | 29.77         |          |
| 46    | 1211      | 23.17         |          |
| 48    | 1285      | 16.53         |          |
| 50    | 1356      | 18.69         |          |
| 52    | 1426      | 53.09         |          |
| 55    | 1535      | 21.08         |          |
| 57    | 1612      | 33.45         |          |
| 59    | 1692      | 37.9          |          |
| 61    | 1772      | 21.91         |          |
| 63    | 1853      | 34.71         |          |
| 65    | 1931      | 35.05         |          |
| 68    | 2049      | 33.96         |          |
| 70    | 2129      | 36.11         |          |
| 73    | 2253      | 30.34         |          |
| 75    | 2331      | 28.41         |          |
| 77    | 2418      | 26.88         |          |
| 79    | 2501      | 27.66         |          |
| 81    | 2585      | 23.31         |          |
| 83    | 2670      | 24.74         |          |
| 83.1  | 2674.3    | 23.83         |          |
| 85    | 2760      | 39.99         |          |
| 85.1  | 2764.5    | 39.4          |          |
| 87    | 2847      | 38.47         |          |
| 89    | 2934      | 20.78         |          |
| 91    | 3026      | 28.09         |          |
| 93    | 3114      | 26.59         |          |
| 95    | 3201      | 29.98         |          |
| 97    | 3289      | 13.99         |          |
| 99    | 3379      | 39.39         |          |
| 101   | 3466      | 29.48         |          |
| 103   | 3558      | nan           |          |
| 105   | 3646      | 27.17         |          |
| 108   | 3778      | 26.13         |          |
| 109   | 3824      | 19.52         |          |
| 111   | 3915      | 27.1          |          |
| 113   | 4009      | 17.29         |          |
| 117   | 4202      | 34.44         |          |

nanat

|       |        |       |
|-------|--------|-------|
| 118   | 4250   | 34.38 |
| 121   | 4381   | 30.51 |
| 123   | 4466   | 36.42 |
| 125   | 4552   | 40.31 |
| 127   | 4642   | 33.79 |
| 129   | 4739   | 31.86 |
| 131   | 4831   | 18.21 |
| 133   | 4929   | 29.47 |
| 135   | 5025   | 32.21 |
| 137   | 5118   | 28.48 |
| 139   | 5212   | 17.05 |
| 140   | 5259   | 20.58 |
| 141   | 5305   | 18.33 |
| 143   | 5397   | 32.04 |
| 145   | 5488   | 26.23 |
| 147   | 5581   | 17.65 |
| 149   | 5674   | 29.53 |
| 151   | 5769   | 33.9  |
| 153   | 5863   | 45.13 |
| 155   | 5955   | 33.09 |
| 157   | 6052   | 29.09 |
| 159   | 6145   | 37.35 |
| 160   | 6193   | 30.4  |
| 161   | 6241   | 25.18 |
| 162   | 6287   | 21.04 |
| 163   | 6334   | 14.01 |
| 165   | 6436   | 33.44 |
| 167   | 6534   | 31.54 |
| 169   | 6631   | 26.69 |
| 170   | 6677   | 32.73 |
| 171   | 6724   | 24.22 |
| 173   | 6823   | 34.02 |
| 175   | 6924   | 26.4  |
| 177   | 7023   | 15.19 |
| 179   | 7124   | 30.18 |
| 180   | 7172   | 27.51 |
| 181   | 7220   | 23.01 |
| 183   | 7315   | 24.44 |
| 184   | 7364   | 32.18 |
| 187   | 7509   | 30.31 |
| 189   | 7602   | 30.32 |
| 191   | 7697   | 27.39 |
| 193   | 7794   | 18.9  |
| 195   | 7894   | 22.32 |
| 197   | 7994   | 23.01 |
| 199   | 8091   | 23.33 |
| 199.1 | 8095.4 | 37.95 |
| 201   | 8178   | 31.09 |
| 201.1 | 8182.8 | 34.28 |
| 203   | 8276   | 18.15 |
| 204   | 8325   | 19.34 |
| 205   | 8374   | 24.93 |
| 205.1 | 8378.8 | 22.52 |
| 206   | 8422   | 12.78 |
| 207   | 8471   | 27.54 |

nanat

|       |         |       |
|-------|---------|-------|
| 207.1 | 8475.9  | 19.66 |
| 209   | 8569    | 37.07 |
| 210   | 8619    | 18.11 |
| 211   | 8668    | 13.54 |
| 213   | 8763    | 22.66 |
| 215   | 8861    | 17.65 |
| 217   | 8960    | 20.83 |
| 220   | 9107    | 27.64 |
| 224   | 9298    | 37.51 |
| 224.1 | 9302.8  | 25.87 |
| 225   | 9346    | 13.25 |
| 230   | 9589    | 20.71 |
| 243   | 10218   | 24.32 |
| 247   | 10415   | 34.8  |
| 255   | 10812   | 18.33 |
| 262   | 11146   | 14.53 |
| 270   | 11537   | 12.47 |
| 273   | 11695   | 42.75 |
| 280   | 12087   | 26.97 |
| 282   | 12202   | 37.27 |
| 285   | 12385   | 27.74 |
| 285.1 | 12391.1 | 38.35 |
| 286   | 12446   | 30.17 |
| 287   | 12507   | 44.9  |
| 287.1 | 12513.2 | 33.32 |
| 288   | 12569   | 48.24 |
| 289   | 12632   | 44.41 |
| 290   | 12694   | 44.89 |
| 290.1 | 12700.1 | 52.1  |
| 291   | 12755   | 45.36 |
| 292   | 12815   | 53.88 |
| 293   | 12874   | 52.7  |
| 295   | 12994   | 61.92 |
| 295.1 | 13000.1 | 48.93 |
| 299   | 13237   | 64.09 |
| 302   | 13414   | 37.34 |
| 303   | 13476   | 49.56 |
| 303.1 | 13482.3 | 55.62 |
| 304   | 13539   | 61.78 |
| 305   | 13600   | 59    |
| 305.1 | 13605.9 | 53.55 |
| 306   | 13659   | 39.76 |
| 307   | 13718   | 60.57 |
| 307.1 | 13723.6 | 45.71 |
| 308   | 13774   | 55.7  |
| 310   | 13883   | 47.23 |
| 311   | 13938   | 53.23 |
| 312   | 13992   | 33.37 |
| 312.1 | 13997.6 | 24.23 |
| 313   | 14048   | 51.53 |
| 314   | 14105   | 43.09 |
| 314.1 | 14110.8 | 47.38 |
| 317   | 14281   | 56.46 |
| 318   | 14342   | 24.93 |
| 320   | 14466   | 58.41 |

nanat

|       |         |        |
|-------|---------|--------|
| 320.1 | 14472   | 44.5   |
| 322   | 14589   | 53.25  |
| 322.1 | 14595.2 | 30.43  |
| 323   | 14651   | 44.99  |
| 326   | 14839   | 55.12  |
| 326.1 | 14845.5 | 49.77  |
| 327   | 14904   | 54.54  |
| 328   | 14968   | 60.62  |
| 329   | 15032   | 58.51  |
| 330   | 15099   | 43.98  |
| 330.1 | 15105.8 | 56.4   |
| 331   | 15167   | 44     |
| 333   | 15300   | 44.21  |
| 333.1 | 15306.6 | 65.3   |
| 334   | 15366   | 44.42  |
| 336   | 15501   | 59.04  |
| 336.1 | 15507.9 | 70.17  |
| 337   | 15570   | 37.72  |
| 339   | 15708   | 50.57  |
| 339.1 | 15714.9 | 69.57  |
| 340   | 15777   | 65.36  |
| 341   | 15845   | 75.94  |
| 341.1 | 15852   | 76.7   |
| 342   | 15915   | 52.21  |
| 343   | 15987   | 61.37  |
| 344   | 16057   | 71.23  |
| 345   | 16128   | 61.45  |
| 345.1 | 16135.3 | 71.55  |
| 347   | 16275   | 79.02  |
| 347.1 | 16282.5 | 71.87  |
| 350   | 16502   | 84.24  |
| 350.1 | 16509.5 | 61.36  |
| 352   | 16653   | 100.18 |
| 352.1 | 16660.6 | 65.25  |
| 357   | 17058   | 120.49 |
| 357.1 | 17066.1 | 130.68 |
| 358   | 17139   | 134.4  |
| 360   | 17298   | 68.97  |
| 362   | 17462   | 72.63  |
| 363   | 17544   | 98.42  |
| 363.1 | 17552.1 | 126.79 |
| 371   | 18201   | 114.22 |
| 372   | 18283   | 138.89 |
| 372.1 | 18291.2 | 77.14  |
| 373   | 18365   | 86.78  |
| 374   | 18446   | 116.4  |
| 374.1 | 18454.4 | 96.42  |
| 375   | 18530   | 124.74 |
| 376   | 18615   | 78.66  |
| 377   | 18701   | 107.4  |
| 377.1 | 18709.6 | 136.65 |
| 378   | 18787   | 84.29  |
| 378.1 | 18795.3 | 135.79 |
| 379   | 18870   | 61.19  |
| 380   | 18950   | 62.06  |

nanat

|       |         |        |
|-------|---------|--------|
| 381   | 19032   | 83.37  |
| 381.1 | 19040.4 | 103.81 |
| 383   | 19199   | 111.81 |
| 383.1 | 19207.3 | 114.63 |
| 386   | 19443   | 119.81 |
| 386.1 | 19451.2 | 140.38 |
| 387   | 19525   | 140.92 |
| 390   | 19782   | 136.91 |
| 391   | 19868   | 131.83 |
| 392   | 19953   | 113.64 |
| 395   | 20197   | 133.06 |
| 400   | 20611   | 112.42 |
| 400.1 | 20619.3 | 153.84 |
| 403   | 20859   | 91.78  |
| 404   | 20943   | 94.67  |
| 409   | 21358   | 88.7   |
| 424   | 22629   | 124.33 |
| 428   | 22972   | 114.25 |
| 431   | 23234   | 125.51 |
| 441   | 24102   | 106.69 |
| 450   | 24860   | 145.12 |
| 461   | 25776   | 71.4   |
| 464   | 26017   | 70.6   |
| 476   | 27019   | 95.5   |
| 478   | 27202   | 101.82 |
| 483   | 27641   | 88.38  |
| 483.1 | 27649.9 | 87.35  |
| 489   | 28163   | 110.26 |
| 501   | 29166   | 115.8  |
| 503   | 29332   | 140.61 |
| 510   | 29949   | 72.12  |
| 510.1 | 29957.7 | 77.29  |
| 513   | 30201   | 103.8  |
| 531   | 31733   | 99.72  |
| 541   | 32546   | 102.12 |
| 544   | 32787   | 73.15  |
| 544.1 | 32795.4 | 77.9   |
| 554   | 33628   | 102.78 |
| 559   | 34041   | 55.34  |
| 567   | 34669   | 73.02  |
| 581   | 35705   | 107.78 |
| 586   | 36086   | 74.1   |
| 592   | 36585   | 90.5   |
| 592.1 | 36593.1 | 68.28  |
| 598   | 37066   | 74.52  |
| 600   | 37230   | 99.35  |
| 606   | 37718   | 118    |
| 609   | 37959   | 118.8  |
| 617   | 38619   | 115.38 |
| 619   | 38783   | 68.76  |
| 635   | 40054   | 113.61 |
| 647   | 41031   | 94.48  |
| 647.1 | 41039.1 | 95.26  |
| 655   | 41638   | 96.08  |
| 655.1 | 41645.2 | 100.45 |



nanat

|       |         |        |
|-------|---------|--------|
| 665   | 42374   | 141.54 |
| 670   | 42758   | 78.37  |
| 680   | 43540   | 83.26  |
| 691   | 44463   | 66.97  |
| 697   | 44972   | 112.63 |
| 700   | 45225   | 99.35  |
| 707   | 45846   | 104.12 |
| 718   | 46797   | 92.17  |
| 720   | 46966   | 93.26  |
| 726   | 47462   | 121.51 |
| 745   | 49034   | 57.22  |
| 750   | 49430   | 85.47  |
| 760   | 50217   | 99.48  |
| 762   | 50374   | 74.15  |
| 769   | 50928   | 49.46  |
| 780   | 51794   | 56.77  |
| 810   | 54286   | 78.61  |
| 815   | 54713   | 82.87  |
| 826   | 55615   | 107.51 |
| 828   | 55775   | 72.17  |
| 840   | 56698   | 60.08  |
| 842   | 56850   | 44.19  |
| 844   | 56993   | 67.57  |
| 846   | 57139   | 58.32  |
| 867   | 58759   | 63.37  |
| 877   | 59593   | 74.53  |
| 878   | 59674   | 85.6   |
| 888   | 60519   | 73.17  |
| 891   | 60779   | 66.08  |
| 895   | 61141   | 49.97  |
| 898   | 61406   | 124.98 |
| 898.1 | 61415   | 57.8   |
| 907   | 62213   | 101.47 |
| 925   | 63865   | 73.51  |
| 930   | 64322   | 56.01  |
| 930.1 | 64331.4 | 51.99  |
| 930.2 | 64340.8 | 101.7  |
| 931   | 64416   | 49.26  |
| 934   | 64698   | 63.67  |
| 940   | 65278   | 87.2   |
| 940.2 | 65296.6 | 65.28  |
| 948   | 66045   | 78.33  |
| 948.1 | 66054.9 | 131.69 |
| 953   | 66520   | 90.43  |
| 961   | 67272   | 90.91  |
| 961.1 | 67281.5 | 95.78  |
| 963   | 67462   | 99.97  |
| 965   | 67653   | 98.64  |
| 967   | 67848   | 161.81 |
| 971   | 68233   | 146.9  |
| 971.1 | 68242.7 | 78.42  |
| 973   | 68424   | 84.96  |
| 976   | 68715   | 82.35  |
| 980   | 69071   | 140.21 |
| 980.1 | 69079.4 | 70.84  |

nanat

|        |         |        |
|--------|---------|--------|
| 983    | 69324   | 79.54  |
| 990    | 69959   | 71.31  |
| 990.1  | 69968.5 | 122.34 |
| 995    | 70425   | 31.11  |
| 997    | 70600   | 82.72  |
| 997.1  | 70608.3 | 99.46  |
| 1011   | 71743   | 101.71 |
| 1011.1 | 71750.9 | 87.72  |
| 1012   | 71822   | 59.86  |
| 1020   | 72489   | 55.84  |
| 1020.1 | 72497.9 | 73.24  |
| 1021   | 72578   | 94.93  |
| 1024   | 72840   | 80.22  |
| 1031   | 73440   | 52.27  |
| 1035   | 73795   | 50.76  |
| 1037   | 73973   | 64.71  |
| 1040   | 74238   | 48.35  |
| 1040.1 | 74246.4 | 53.32  |
| 1049   | 74985   | 72.29  |
| 1050   | 75066   | 55.24  |
| 1050.1 | 75074.1 | 54.9   |
| 1051   | 75147   | 75.32  |
| 1051.1 | 75155.2 | 47.34  |
| 1061   | 75928   | 68.4   |
| 1061.1 | 75935.9 | 74.58  |
| 1068   | 76465   | 64.23  |
| 1069   | 76543   | 52.1   |
| 1070   | 76622   | 62.4   |
| 1072   | 76777   | 45.47  |
| 1072.1 | 76784.7 | 47.94  |
| 1080   | 77433   | 35.81  |
| 1081   | 77521   | 54.31  |
| 1081.1 | 77529.5 | 92.43  |
| 1083   | 77687   | 57.7   |
| 1092   | 78437   | 57.38  |
| 1092.1 | 78445.5 | 57.2   |
| 1095   | 78690   | 50.32  |
| 1096   | 78772   | 58.74  |
| 1097   | 78854   | 49.98  |
| 1098   | 78937   | 46.68  |
| 1098.1 | 78945.3 | 58.07  |
| 1115   | 80257   | 64.24  |
| 1131   | 81453   | 60.13  |
| 1145   | 82427   | 49.85  |
| 1158   | 83331   | 18.58  |
| 1160   | 83470   | 42.5   |
| 1172   | 84308   | 47.5   |
| 1172.1 | 84315   | 37.45  |
| 1181   | 84905   | 43.38  |
| 1182   | 84971   | 34.26  |
| 1193   | 85680   | 31.86  |
| 1194   | 85746   | 36.86  |
| 1205   | 86492   | 90.42  |
| 1220   | 87554   | 39.08  |
| 1221   | 87624   | 16.54  |

nanat

|        |          |        |       |
|--------|----------|--------|-------|
| 1243   | 89221    | 27.95  |       |
| 1250   | 89748    | 29.08  |       |
| 1257   | 90286    | 34.89  |       |
| 1270   | 91258    | 55.97  |       |
| 1281   | 92040    | 72.26  |       |
| 1301   | 93468    | 59.83  |       |
| 1308   | 93961    | 46.19  |       |
| 1309   | 94026    | 59.97  |       |
| 1317   | 94585    | 51.44  |       |
| 1330   | 95487    | 110.06 |       |
| 1333   | 95693    | 37.7   |       |
| 1334   | 95761    | 21.68  |       |
| 1345   | 96511    | 37.88  |       |
| 1350   | 96861    | 42.46  |       |
| 1368   | 98157    | 49.79  |       |
| 1370   | 98300    | 49.35  |       |
| 1372   | 98439    | 51.73  |       |
| 1377   | 98783    | 45.07  |       |
| 1381   | 99063    | 48.17  |       |
| 1382   | 99134    | 45.43  |       |
| 1389   | 99622    | 36     |       |
| 1399   | 100301   | 54.07  |       |
| 1399.1 | 100307.6 |        | 48.59 |
| 1402   | 100498   | 51.16  |       |
| 1413   | 101234   | 49.13  |       |
| 1428   | 102177   | 39.89  |       |
| 1449   | 103553   | 39.23  |       |
| 1449.1 | 103560.2 |        | 35.93 |
| 1459   | 104266   | 37.06  |       |
| 1460   | 104337   | 42.65  |       |
| 1474   | 105342   | 31.16  |       |
| 1480   | 105772   | 34.5   |       |
| 1480.1 | 105779   | 44.5   |       |
| 1485   | 106114   | 27.74  |       |
| 1499   | 107121   | 44.73  |       |
| 1507   | 107767   | 67.88  |       |
| 1508   | 107852   | 65.42  |       |
| 1518   | 108706   | 66.17  |       |
| 1531   | 109790   | 49.75  |       |
| 1532   | 109872   | 64.05  |       |
| 1533   | 109952   | 66.34  |       |
| 1549   | 111239   | 52.51  |       |
| 1549.1 | 111247   | 39.32  |       |
| 1550   | 111319   | 28.85  |       |
| 1567   | 112708   | 76.98  |       |
| 1568   | 112790   | 53.19  |       |
| 1576   | 113425   | 51.84  |       |
| 1578   | 113578   | 54.88  |       |
| 1579   | 113656   | 34.05  |       |
| 1579.1 | 113664   | 78.38  |       |
| 1591   | 114562   | 57.83  |       |
| 1592   | 114639   | 37.28  |       |
| 1593   | 114715   | 70.02  |       |
| 1599   | 115150   | 44.54  |       |
| 1599.1 | 115157.2 |        | 42.59 |

nanat

|        |          |       |       |
|--------|----------|-------|-------|
| 1607   | 115683   | 33.38 |       |
| 1616   | 116296   | 50.82 |       |
| 1619   | 116497   | 23.29 |       |
| 1619.1 | 116503.6 |       | 25.46 |
| 1624   | 116827   | 23.86 |       |
| 1631   | 117264   | 56.56 |       |
| 1636   | 117575   | 23.17 |       |
| 1637   | 117635   | 18.3  |       |
| 1638   | 117697   | 24.25 |       |
| 1645   | 118135   | 13.19 |       |
| 1648   | 118314   | 19.84 |       |
| 1649   | 118376   | 14.28 |       |
| 1650   | 118438   | 18.19 |       |
| 1650.1 | 118444.1 |       | 27.03 |
| 1651   | 118499   | 20.2  |       |
| 1652   | 118559   | 27.42 |       |
| 1671   | 119710   | 29.7  |       |
| 1679   | 120199   | 21.23 |       |
| 1679.1 | 120205   | 25.33 |       |
| 1683   | 120439   | 19.93 |       |
| 1684   | 120498   | 19.52 |       |
| 1687   | 120669   | 15.86 |       |
| 1698   | 121314   | 24.96 |       |
| 1699   | 121373   | 10.08 |       |
| 1699.1 | 121378.9 |       | 14.62 |
| 1700   | 121432   | 10.22 |       |
| 1701   | 121492   | 9.37  |       |
| 1710   | 122006   | 18.79 |       |
| 1711   | 122064   | 9.64  |       |
| 1712   | 122122   | 10.13 |       |
| 1715   | 122290   | 9.78  |       |
| 1719   | 122515   | 17.18 |       |
| 1719.1 | 122520.6 |       | 13.86 |
| 1726   | 122919   | 24.59 |       |
| 1730   | 123154   | 10.88 |       |
| 1738   | 123602   | 7.96  |       |
| 1739   | 123658   | 15.62 |       |
| 1740   | 123715   | 17.56 |       |
| 1740.1 | 123720.5 |       | 13.7  |
| 1741   | 123770   | 9.47  |       |
| 1744   | 123936   | 18.25 |       |
| 1759   | 124765   | 18.49 |       |
| 1759.1 | 124770.6 |       | 12.92 |
| 1760   | 124821   | 10.36 |       |
| 1762   | 124935   | 13.58 |       |
| 1763   | 124993   | 14.69 |       |
| 1768   | 125271   | 11.31 |       |
| 1775   | 125653   | 12    |       |
| 1779   | 125877   | 71.15 |       |
| 1780   | 125933   | 18.02 |       |
| 1783   | 126103   | 16.51 |       |
| 1785   | 126217   | 13.27 |       |
| 1787   | 126327   | 10.03 |       |
| 1792   | 126598   | 16.98 |       |
| 1798   | 126904   | 10.21 |       |

|        |          |       |       |
|--------|----------|-------|-------|
| 1798.1 | 126909.1 | 12.4  | nanat |
| 1800   | 127006   | 5.3   |       |
| 1801   | 127057   | 17.55 |       |
| 1802   | 127108   | 7.9   |       |
| 1802.1 | 127113.1 | 11.43 |       |
| 1805   | 127260   | 9.4   |       |
| 1807   | 127360   | 23.39 |       |
| 1807.1 | 127365   | 12.81 |       |
| 1810   | 127510   | 4.93  |       |
| 1812   | 127610   | 14.54 |       |
| 1815   | 127760   | 38.46 |       |
| 1816   | 127810   | 7.88  |       |
| 1817   | 127860   | 10.41 |       |
| 1821   | 128062   | 18.31 |       |
| 1821.1 | 128067   | 12.51 |       |
| 1822   | 128112   | 7.58  |       |
| 1823   | 128161   | 43.53 |       |
| 1825   | 128259   | 12.29 |       |
| 1825.5 | 128284   | 7.13  |       |
| 1826   | 128309   | 16.99 |       |
| 1828   | 128405   | 9.06  |       |
| 1830   | 128501   | 7.18  |       |
| 1831   | 128549   | 7.51  |       |
| 1831.1 | 128554   | 10.48 |       |
| 1832   | 128599   | 8.48  |       |
| 1837   | 128854   | 13.7  |       |
| 1837.1 | 128859.2 | 7.48  |       |
| 1840   | 129011   | 6.56  |       |
| 1840.1 | 129016.4 | 6.48  |       |
| 1845   | 129274   | 8.05  |       |
| 1845.1 | 129279   | 8.23  |       |
| 1848   | 129428   | 13.2  |       |
| 1850   | 129545   | 14.37 |       |
| 1852   | 129653   | 9.65  |       |
| 1853   | 129705   | 19.33 |       |
| 1856   | 129863   | 13.82 |       |
| 1857   | 129916   | 46.67 |       |
| 1860   | 130079   | 9.65  |       |
| 1862   | 130185   | 8.78  |       |
| 1867   | 130467   | 24.3  |       |
| 1868   | 130525   | 23.66 |       |
| 1872   | 130759   | 17.74 |       |
| 1876   | 131004   | 22.55 |       |
| 1877   | 131066   | 8.79  |       |
| 1882   | 131374   | 23.95 |       |
| 1882.1 | 131380.5 | 39.24 |       |
| 1883   | 131439   | 27.46 |       |
| 1887   | 131707   | 27.22 |       |
| 1888   | 131773   | 16.77 |       |
| 1892   | 132048   | 19.56 |       |
| 1898   | 132477   | 30.96 |       |
| 1898.1 | 132484.1 | 44.13 |       |
| 1900   | 132619   | 24.3  |       |
| 1901   | 132691   | 44.56 |       |
| 1903   | 132836   | 59.62 |       |

nanat

|        |          |        |        |
|--------|----------|--------|--------|
| 1905   | 132987   | 40     |        |
| 1907   | 133142   | 53.42  |        |
| 1910   | 133374   | 114.71 |        |
| 1914   | 133679   | 35.48  |        |
| 1918   | 134005   | 92.94  |        |
| 1918.1 | 134013.6 |        | 76.93  |
| 1925   | 134628   | 58.82  |        |
| 1932   | 135308   | 73.02  |        |
| 1935   | 135604   | 90.31  |        |
| 1938   | 135903   | 91     |        |
| 1941   | 136206   | 85.39  |        |
| 1941.1 | 136216.3 |        | 86.67  |
| 1947   | 136819   | 45.5   |        |
| 1947.1 | 136829.4 |        | 83.2   |
| 1952   | 137341   | 73.67  |        |
| 1956   | 137754   | 94.57  |        |
| 1957   | 137858   | 89.55  |        |
| 1958   | 137966   | 72.08  |        |
| 1963   | 138532   | 133.02 |        |
| 1963.1 | 138543.2 |        | 105.98 |
| 1964   | 138644   | 118.94 |        |
| 1971   | 139418   | 128.74 |        |
| 1971.1 | 139429.2 |        | 89.33  |
| 1972   | 139530   | 96.64  |        |
| 1977   | 140093   | 111.28 |        |
| 1981   | 140542   | 120.81 |        |
| 1982   | 140655   | 124.93 |        |
| 1985   | 140986   | 101.95 |        |
| 1988   | 141323   | 95.72  |        |
| 1988.1 | 141334.1 |        | 115.76 |
| 1994   | 141997   | 90.62  |        |
| 1995   | 142108   | 67.48  |        |
| 1995.1 | 142119   | 114.97 |        |
| 1998   | 142440   | 58.58  |        |
| 2008   | 143562   | 49.93  |        |
| 2010   | 143790   | 91.26  |        |
| 2020   | 144894   | 71.85  |        |
| 2029   | 145905   | 59.46  |        |
| 2038   | 146903   | 71.9   |        |
| 2042   | 147347   | 69.29  |        |
| 2048   | 148025   | 61.61  |        |
| 2054   | 148691   | 53.09  |        |
| 2070   | 150440   | 55.93  |        |
| 2080   | 151502   | 103.89 |        |
| 2089   | 152513   | 69.11  |        |
| 2101   | 153868   | 80.61  |        |
| 2108   | 154664   | 66.64  |        |
| 2109   | 154783   | 37.41  |        |
| 2124   | 156593   | 67.74  |        |
| 2129   | 157202   | 60.69  |        |
| 2139   | 158359   | 71.28  |        |
| 2149   | 159444   | 83.36  |        |
| 2155   | 160076   | 78.25  |        |
| 2158   | 160403   | 77.29  |        |
| 2167   | 161427   | 93.62  |        |

nanat

|      |        |        |
|------|--------|--------|
| 2173 | 162117 | 78.68  |
| 2177 | 162543 | 104.38 |
| 2188 | 163777 | 98.77  |
| 2198 | 165021 | 90.35  |
| 2202 | 165522 | 98.31  |
| 2210 | 166537 | 126.27 |
| 2219 | 167664 | 81.46  |
| 2225 | 168391 | 53.41  |
| 2233 | 169314 | 81.57  |
| 2242 | 170340 | 52.79  |
| 2255 | 171880 | 65.29  |
| 2259 | 172393 | 65.69  |
| 2269 | 173642 | 59.95  |
| 2278 | 174688 | 59.06  |
| 2279 | 174804 | 52.24  |
| 2290 | 176117 | 39.72  |
| 2298 | 177142 | 58.09  |
| 2302 | 177644 | 41.86  |
| 2309 | 178554 | 91.38  |
| 2319 | 179820 | 52.96  |
| 2324 | 180426 | 70.21  |
| 2329 | 181011 | 90.16  |
| 2338 | 182146 | 70.73  |
| 2350 | 183807 | 113.05 |
| 2354 | 184367 | 50.49  |
| 2359 | 185069 | 95.38  |
| 2369 | 186499 | 107.09 |
| 2373 | 187067 | 93.49  |
| 2377 | 187630 | 89.19  |
| 2388 | 189165 | 57.84  |
| 2400 | 190705 | 49.83  |
| 2401 | 190822 | 54.17  |
| 2412 | 192138 | 79.28  |
| 2422 | 193421 | 42.49  |
| 2431 | 194565 | 28.36  |
| 2441 | 195808 | 50.52  |
| 2449 | 196846 | 41.02  |
| 2452 | 197211 | 18.92  |
| 2462 | 198426 | 40.27  |
| 2469 | 199220 | 56.9   |
| 2480 | 200451 | 35.62  |
| 2489 | 201423 | 31.96  |
| 2499 | 202496 | 56.86  |
| 2501 | 202717 | 41.35  |
| 2502 | 202826 | 18.98  |
| 2504 | 203046 | 37.4   |
| 2509 | 203592 | 20.35  |
| 2510 | 203704 | 52.28  |
| 2516 | 204394 | 41.63  |
| 2517 | 204512 | 26.85  |
| 2519 | 204743 | 49.52  |
| 2522 | 205092 | 18.47  |
| 2525 | 205458 | 51.83  |
| 2526 | 205582 | 46.53  |
| 2527 | 205708 | 49.61  |

nanat

|         |        |        |
|---------|--------|--------|
| 2529    | 205965 | 75.03  |
| 2533    | 206496 | nan    |
| 2536    | 206890 | 38.87  |
| 2537    | 207019 | 59.8   |
| 2538    | 207149 | 71.69  |
| 2541    | 207540 | 33.81  |
| 2543    | 207803 | 51.11  |
| 2550.41 | 208747 | 69.53  |
| 2553.41 | 209122 | 49.73  |
| 2556.41 | 209487 | 60.12  |
| 2560.41 | 209989 | 65.41  |
| 2563.41 | 210348 | 60.67  |
| 2570.41 | 211176 | 67.99  |
| 2575.41 | 211771 | 26.45  |
| 2578.41 | 212122 | 43.49  |
| 2581.41 | 212470 | 32.43  |
| 2584.41 | 212813 | 56.56  |
| 2587.41 | 213156 | 19.34  |
| 2590.41 | 213500 | nan    |
| 2593.41 | 213845 | 19.14  |
| 2599.41 | 214525 | 25.16  |
| 2602.41 | 214865 | 28.8   |
| 2605.41 | 215207 | 25.99  |
| 2612.41 | 216004 | 32.29  |
| 2614.41 | 216247 | 40.27  |
| 2617.41 | 216608 | 11.73  |
| 2620.41 | 216951 | 28.13  |
| 2627.41 | 217747 | 13.13  |
| 2630.41 | 218110 | 17.83  |
| 2632.41 | 218353 | 21.9   |
| 2635.41 | 218736 | 27.88  |
| 2639.41 | 219261 | 51.7   |
| 2641.41 | 219527 | 51.84  |
| 2642.41 | 219660 | 49.4   |
| 2645.41 | 220082 | 78.06  |
| 2648.41 | 220523 | 59.71  |
| 2649.41 | 220674 | 60.54  |
| 2652.41 | 221120 | 61.13  |
| 2653.41 | 221273 | 58.67  |
| 2656.41 | 221752 | 72.5   |
| 2657.41 | 221918 | 69.48  |
| 2659.41 | 222253 | 84.76  |
| 2662.41 | 222782 | 95.22  |
| 2669.41 | 224055 | 108.38 |
| 2672.41 | 224610 | 96.28  |
| 2675.41 | 225128 | 85.88  |
| 2678.41 | 225629 | 79.65  |
| 2679.41 | 225797 | 68.98  |
| 2681.41 | 226140 | 51.41  |
| 2686.41 | 227016 | 83.93  |
| 2690.41 | 227774 | 97.45  |
| 2693.41 | 228313 | 97.61  |
| 2697.41 | 229052 | 84     |
| 2700.41 | 229617 | 81.33  |
| 2704.41 | 230336 | 68.56  |



nanat

|         |        |        |
|---------|--------|--------|
| 2707.41 | 230867 | 84.27  |
| 2710.41 | 231383 | 89.03  |
| 2716.41 | 232364 | 50.14  |
| 2720.41 | 232993 | 51.59  |
| 2723.41 | 233452 | 55.91  |
| 2729.41 | 234327 | 42.02  |
| 2731.41 | 234610 | 38.69  |
| 2734.41 | 235043 | 48.32  |
| 2737.41 | 235469 | 31.74  |
| 2741.41 | 236033 | 33.01  |
| 2743.41 | 236305 | 31.69  |
| 2746.41 | 236707 | 32.84  |
| 2750.41 | 237216 | 22.82  |
| 2752.41 | 237459 | 21.55  |
| 2755.41 | 237801 | 15.41  |
| 2757.41 | 238020 | 17.53  |
| 2761.41 | 238465 | 6.05   |
| 2764.41 | 238813 | 6.96   |
| 2767.41 | 239175 | 8.07   |
| 2770.41 | 239562 | 12.78  |
| 2773.41 | 239992 | 26.09  |
| 2776.41 | 240453 | 33.28  |
| 2779.41 | 240947 | 36.3   |
| 2782.41 | 241484 | 47.91  |
| 2785.41 | 242071 | 78.17  |
| 2788.41 | 242656 | 69.91  |
| 2791.41 | 243220 | 74.54  |
| 2794.41 | 243797 | 85.04  |
| 2797.41 | 244425 | 79.57  |
| 2800.41 | 245070 | 98.61  |
| 2803.41 | 245707 | 92.62  |
| 2806.41 | 246358 | 116.58 |
| 2810.41 | 247224 | 121.2  |
| 2812.41 | 247656 | 104.81 |
| 2815.41 | 248321 | 102.13 |
| 2818.41 | 248998 | 121.44 |
| 2821.41 | 249647 | 90.69  |
| 2824.41 | 250287 | 124.37 |
| 2827.41 | 250901 | 69.62  |
| 2829.41 | 251320 | 90.61  |
| 2833.41 | 252195 | 95.03  |
| 2836.41 | 252858 | 90.32  |
| 2839.41 | 253535 | 106.94 |
| 2845.41 | 254851 | 71.49  |
| 2848.41 | 255490 | 87.84  |
| 2851.41 | 256161 | 74.37  |
| 2854.41 | 256855 | 95.55  |
| 2857.41 | 257580 | 104.24 |
| 2860.41 | 258325 | 94.87  |
| 2863.41 | 259083 | 102.24 |
| 2866.41 | 259856 | 152.41 |
| 2870.41 | 260911 | 120.4  |
| 2872.41 | 261445 | 105.18 |
| 2875.41 | 262241 | 126.3  |
| 2878.41 | 263043 | 129.02 |

nanat

|         |        |        |
|---------|--------|--------|
| 2880.41 | 263575 | 119.87 |
| 2881.41 | 263844 | 123.72 |
| 2883.41 | 264380 | 122.58 |
| 2884.41 | 264639 | 99.62  |
| 2886.41 | 265164 | 107.27 |
| 2887.41 | 265433 | 120.12 |
| 2888.41 | 265706 | 116.87 |
| 2889.41 | 265971 | 121.51 |
| 2890.41 | 266228 | 98.71  |
| 2892.41 | 266750 | 103.33 |
| 2893.41 | 267012 | 143.65 |
| 2895.41 | 267538 | 101.75 |
| 2896.41 | 267796 | 107.78 |
| 2897.41 | 268048 | 118.83 |
| 2899.41 | 268534 | 71.4   |
| 2901.41 | 269029 | 80.69  |
| 2902.41 | 269281 | 88.42  |
| 2904.41 | 269780 | 90.81  |
| 2905.41 | 270026 | nan    |
| 2907.41 | 270507 | 75.76  |
| 2908.41 | 270744 | 85.8   |
| 2910.41 | 271210 | 69.34  |
| 2911.41 | 271444 | 73.1   |
| 2913.41 | 271917 | 69.78  |
| 2914.41 | 272144 | 88.86  |
| 2916.41 | 272592 | 64.61  |
| 2917.41 | 272815 | 59.54  |
| 2919.41 | 273256 | 65.43  |
| 2920.41 | 273475 | 71.84  |
| 2922.41 | 273918 | 53.95  |
| 2923.41 | 274136 | 62.12  |
| 2925.41 | 274565 | 55.54  |
| 2926.41 | 274781 | 63.28  |
| 2928.41 | 275216 | 49.32  |
| 2929.41 | 275432 | 53.09  |
| 2931.41 | 275859 | 53.64  |
| 2932.41 | 276070 | 38.61  |
| 2934.41 | 276496 | 51.02  |
| 2935.41 | 276707 | 56.48  |
| 2937.41 | 277122 | 28.88  |
| 2938.41 | 277334 | 64.71  |
| 2940.41 | 277771 | nan    |
| 2941.41 | 277996 | 46.55  |
| 2943.41 | 278456 | 61.5   |
| 2944.41 | 278688 | 48.24  |
| 2946.41 | 279153 | 57.12  |
| 2947.41 | 279391 | 64.55  |
| 2949.41 | 279886 | 69.77  |
| 2950.41 | 280147 | 69.41  |
| 2952.41 | 280668 | 90.39  |
| 2953.41 | 280921 | 58.66  |
| 2955.41 | 281443 | 84.92  |
| 2956.41 | 281714 | 79.55  |
| 2958.41 | 282250 | 70.82  |
| 2959.41 | 282510 | 77.79  |

nanat

|         |        |       |
|---------|--------|-------|
| 2961.41 | 283013 | 69.26 |
| 2962.41 | 283265 | 51    |
| 2964.41 | 283785 | 74.48 |
| 2966.41 | 284337 | 76.29 |
| 2967.41 | 284629 | 104.6 |
| 2969.41 | 285223 | 92.4  |
| 2970.41 | 285516 | 97.76 |
| 2972.41 | 286083 | 73.43 |
| 2973.41 | 286362 | 84.72 |
| 2975.41 | 286916 | 70.9  |
| 2976.41 | 287191 | 78.39 |
| 2978.41 | 287724 | 84.38 |
| 2979.41 | 287988 | 64.82 |
| 2981.41 | 288533 | 75.35 |
| 2982.41 | 288816 | 65.14 |
| 2984.41 | 289385 | 93.47 |
| 2985.41 | 289661 | 80.19 |
| 2987.41 | 290216 | 69.83 |
| 2988.41 | 290496 | 73.23 |
| 2990.41 | 291037 | 90.97 |
| 2991.41 | 291300 | 65.61 |
| 2993.41 | 291830 | 75.93 |
| 2994.41 | 292091 | 74.12 |
| 2996.41 | 292589 | 64.82 |
| 2997.41 | 292832 | 55.87 |
| 2999.41 | 293343 | 55.48 |
| 3000.41 | 293616 | 68.27 |
| 3002.41 | 294178 | 64.23 |
| 3003.41 | 294466 | 73.7  |
| 3005.41 | 295033 | 68.2  |
| 3006.41 | 295311 | 68.31 |
| 3008.41 | 295860 | 67.77 |
| 3009.41 | 296130 | 58.63 |
| 3011.41 | 296676 | 62.09 |
| 3012.41 | 296953 | 62.97 |
| 3014.41 | 297506 | 62.69 |
| 3015.41 | 297781 | 49.44 |
| 3017.41 | 298326 | 53.35 |
| 3018.41 | 298593 | 38.52 |
| 3020.41 | 299120 | 28.21 |
| 3021.41 | 299381 | 38.36 |
| 3023.41 | 299891 | 40.24 |
| 3024.41 | 300143 | 30.97 |
| 3026.41 | 300650 | 47.9  |
| 3027.41 | 300903 | 40.73 |
| 3029.41 | 301410 | 40.04 |
| 3030.41 | 301664 | 45.19 |
| 3032.41 | 302167 | 36.66 |
| 3033.41 | 302428 | 44.06 |
| 3035.41 | 302934 | 47.28 |
| 3036.41 | 303175 | 30.82 |
| 3038.41 | 303661 | 23.9  |
| 3039.41 | 303916 | 41.87 |
| 3041.41 | 304445 | 38.98 |
| 3042.41 | 304721 | 38.69 |

nanat

|         |        |       |
|---------|--------|-------|
| 3044.41 | 305291 | 42.16 |
| 3045.41 | 305586 | 47.17 |
| 3047.41 | 306201 | 51.02 |
| 3048.41 | 306514 | 67.72 |
| 3050.41 | 307130 | 73.51 |
| 3051.41 | 307432 | 62.96 |
| 3053.41 | 308030 | 71.44 |
| 3054.41 | 308327 | 44.96 |
| 3056.41 | 308907 | 38.55 |
| 3057.41 | 309195 | 39.65 |
| 3059.41 | 309767 | 37.12 |
| 3060.41 | 310049 | 43.61 |
| 3062.41 | 310605 | 31.7  |
| 3063.41 | 310876 | 32.56 |
| 3065.41 | 311411 | 31.85 |
| 3066.41 | 311676 | 34.77 |
| 3068.41 | 312209 | 29.93 |
| 3069.41 | 312476 | 29.19 |
| 3071.41 | 313006 | 38.6  |
| 3072.41 | 313265 | 30.89 |
| 3074.41 | 313778 | 28.01 |
| 3075.41 | 314033 | 24.26 |
| 3077.41 | 314542 | 22.58 |
| 3078.41 | 314795 | 22.1  |
| 3080.41 | 315296 | 28.73 |
| 3081.41 | 315544 | 24.91 |
| 3083.41 | 316034 | 26.09 |
| 3084.41 | 316279 | 13.6  |
| 3086.41 | 316766 | 26.07 |
| 3087.41 | 317010 | 33.98 |
| 3089.41 | 317503 | 21.41 |
| 3090.41 | 317751 | 16.87 |
| 3092.41 | 318241 | 17.47 |
| 3093.41 | 318485 | 19.44 |
| 3095.41 | 318973 | 18.58 |
| 3096.41 | 319219 | 23.1  |
| 3098.41 | 319708 | 17.32 |
| 3099.41 | 319955 | 18.23 |
| 3101.41 | 320458 | 14.45 |
| 3102.41 | 320709 | 20.94 |
| 3104.41 | 321191 | 15    |
| 3105.41 | 321423 | 9.17  |
| 3107.41 | 321872 | 12.19 |
| 3108.41 | 322088 | 8.11  |
| 3110.41 | 322513 | 5.78  |
| 3111.41 | 322724 | 3.1   |
| 3113.41 | 323144 | 6.48  |
| 3114.41 | 323356 | 6.54  |
| 3116.41 | 323784 | 7.25  |
| 3117.41 | 324000 | 10.96 |
| 3119.41 | 324441 | 7.09  |
| 3120.41 | 324668 | 7.29  |
| 3122.41 | 325137 | 8.01  |
| 3123.41 | 325380 | 3.51  |
| 3125.41 | 325901 | 8.08  |

nanat

|         |        |        |
|---------|--------|--------|
| 3126.41 | 326176 | 14.17  |
| 3128.41 | 326767 | 20.91  |
| 3128.51 | 326799 | 23.16  |
| 3131.41 | 327731 | 31.46  |
| 3132.41 | 328061 | 28.24  |
| 3134.41 | 328747 | 36.26  |
| 3135.41 | 329104 | nan    |
| 3137.41 | 329853 | 41.72  |
| 3138.41 | 330243 | 48.31  |
| 3140.41 | 331054 | 62.99  |
| 3141.41 | 331474 | 61.53  |
| 3143.41 | 332353 | 74.36  |
| 3146.41 | 333807 | 113.44 |
| 3148.41 | 334805 | 97.23  |
| 3150.41 | 335794 | 96.69  |
| 3152.41 | 336767 | 83.12  |
| 3153.41 | 337255 | 92.62  |
| 3155.41 | 338233 | 93.92  |
| 3156.41 | 338724 | 84.24  |
| 3158.41 | 339705 | 82.6   |
| 3159.41 | 340197 | 85.15  |
| 3161.41 | 341180 | 86.87  |
| 3162.41 | 341654 | 67.34  |
| 3164.41 | 342597 | 68.9   |
| 3165.41 | 343078 | 72.37  |
| 3167.41 | 344056 | 70.02  |
| 3168.41 | 344549 | 74.55  |
| 3170.41 | 345530 | 109.49 |
| 3171.41 | 346025 | 77.95  |
| 3173.41 | 347031 | 86.12  |
| 3174.41 | 347540 | 76.63  |
| 3176.41 | 348570 | 86.57  |
| 3177.41 | 349093 | 78.71  |
| 3179.41 | 350170 | 90.73  |
| 3180.41 | 350719 | 98.93  |
| 3182.41 | 351823 | 90.39  |
| 3183.41 | 352380 | 106.55 |
| 3185.41 | 353505 | 100.68 |
| 3186.41 | 354068 | 109.37 |
| 3188.41 | 355185 | 110.17 |
| 3189.41 | 355737 | 93.71  |
| 3191.41 | 356840 | 82.89  |
| 3192.41 | 357390 | 101.89 |
| 3194.41 | 358468 | 149.64 |
| 3195.41 | 359008 | 83.1   |
| 3197.41 | 360069 | 70.08  |
| 3198.41 | 360592 | 64.83  |
| 3200.41 | 361659 | 74.51  |
| 3201.41 | 362190 | 78.73  |
| 3203.41 | 363263 | 91.53  |
| 3204.41 | 363799 | 73.63  |
| 3206.41 | 364884 | 70.34  |
| 3207.41 | 365427 | 62.14  |
| 3209.41 | 366479 | 64.19  |
| 3210.41 | 366994 | 48.81  |

nanat

|         |        |       |
|---------|--------|-------|
| 3212.41 | 368026 | 52.89 |
| 3213.41 | 368534 | 51.18 |
| 3215.41 | 369547 | 46.94 |
| 3216.41 | 370081 | 56.68 |
| 3218.41 | 371200 | 71.29 |
| 3219.41 | 371793 | 76.02 |
| 3221.41 | 372986 | 65.6  |
| 3222.41 | 373568 | 63.69 |
| 3224.41 | 374709 | 56.66 |
| 3225.41 | 375272 | 48.85 |
| 3227.41 | 376374 | 54.06 |
| 3228.41 | 376901 | 43.41 |
| 3230.41 | 377910 | 41.26 |
| 3231.41 | 378429 | 41.02 |
| 3233.41 | 379529 | 57.55 |
| 3234.41 | 380098 | 56.98 |
| 3236.41 | 381224 | 52.06 |
| 3237.41 | 381774 | 51.24 |
| 3239.41 | 382832 | 43.43 |
| 3240.41 | 383342 | 42.94 |
| 3242.41 | 384385 | 45.09 |
| 3245.41 | 386154 | 53.8  |
| 3246.41 | 386790 | 68.94 |
| 3248.41 | 388063 | 58.75 |
| 3249.41 | 388692 | 69.96 |
| 3251.41 | 389966 | 58.76 |
| 3252.41 | 390616 | 65.76 |
| 3254.41 | 391928 | 61.27 |
| 3255.41 | 392586 | 63.6  |
| 3257.41 | 393907 | 64.1  |
| 3258.41 | 394559 | 53.91 |
| 3260.41 | 395782 | 46.24 |
| 3261.41 | 396359 | 42.3  |
| 3263.41 | 397481 | 36.28 |
| 3264.41 | 398035 | 27.19 |
| 3266.41 | 399133 | 28.63 |
| 3267.41 | 399680 | 29.19 |
| 3269.41 | 400776 | 28.8  |
| 3270.41 | 401318 | 26.18 |
| 3272.41 | 402404 | 23.05 |
| 3273.41 | 402953 | 19.64 |
| 3275.41 | 404033 | 19.78 |
| 3276.41 | 404562 | 16.92 |
| 3278.41 | 405615 | 16.13 |
| 3279.41 | 406135 | 14.84 |
| 3280.41 | 406653 | 16.83 |
| 3282.41 | 407677 | 14.94 |
| 3283.41 | 408185 | 11.54 |
| 3285.41 | 409199 | 13.78 |
| 3286.41 | 409701 | 13.42 |
| 3288.41 | 410686 | 10.98 |
| 3289.41 | 411189 | 13.75 |
| 3291.41 | 412224 | 13.2  |
| 3292.41 | 412750 | 12.29 |
| 3294.41 | 413825 | 13.9  |

|         |        |       |
|---------|--------|-------|
| 3295.41 | 414370 | 13.85 |
| 3297.41 | 415459 | 14.72 |
| 3298.41 | 416005 | 13.41 |
| 3300.41 | 417096 | 13.78 |
| 3301.41 | 417645 | 13.32 |
| 3303.41 | 418759 | 12.02 |
| 3304.41 | 419336 | 13.66 |

nanat

|       |           |         |       | deutnat |         |
|-------|-----------|---------|-------|---------|---------|
| Depth | corrected | Ice age | (GT4) | deut    | deltaTS |
| 0     | 0         | -438    | 0.00  |         |         |
| 1     | 17        | -438    | 0.00  |         |         |
| 2     | 35        | -438    | 0.00  |         |         |
| 3     | 53        | -438    | 0.00  |         |         |
| 4     | 72        | -438    | 0.00  |         |         |
| 5     | 91        | -438    | 0.00  |         |         |
| 6     | 110       | -438    | 0.00  |         |         |
| 7     | 129       | -438    | 0.00  |         |         |
| 8     | 149       | -442.9  | -0.81 |         |         |
| 9     | 170       | -437.9  | 0.02  |         |         |
| 10    | 190       | -435.8  | 0.36  |         |         |
| 11    | 211       | -443.7  | -0.95 |         |         |
| 12    | 234       | -449.1  | -1.84 |         |         |
| 13    | 258       | -444.6  | -1.09 |         |         |
| 14    | 281       | -442.5  | -0.75 |         |         |
| 15    | 304       | -439.3  | -0.22 |         |         |
| 16    | 327       | -440.9  | -0.48 |         |         |
| 17    | 351       | -442.5  | -0.75 |         |         |
| 18    | 375       | -436.6  | 0.23  |         |         |
| 19    | 397       | -430    | 1.33  |         |         |
| 20    | 420       | -435.9  | 0.35  |         |         |
| 21    | 444       | -436.9  | 0.18  |         |         |
| 22    | 469       | -438.5  | -0.08 |         |         |
| 23    | 495       | -444.5  | -1.08 |         |         |
| 24    | 523       | -446.4  | -1.39 |         |         |
| 25    | 552       | -447.7  | -1.61 |         |         |
| 26    | 581       | -443.4  | -0.90 |         |         |
| 27    | 609       | -441.6  | -0.60 |         |         |
| 28    | 637       | -438.1  | -0.02 |         |         |
| 29    | 665       | -439.1  | -0.18 |         |         |
| 30    | 695       | -445.4  | -1.23 |         |         |
| 31    | 726       | -447.3  | -1.54 |         |         |
| 32    | 757       | -443.1  | -0.85 |         |         |
| 33    | 788       | -438.6  | -0.10 |         |         |
| 34    | 817       | -439    | -0.17 |         |         |
| 35    | 848       | -442.7  | -0.78 |         |         |
| 36    | 881       | -442.7  | -0.78 |         |         |
| 37    | 912       | -439    | -0.17 |         |         |
| 38    | 944       | -439.5  | -0.25 |         |         |
| 39    | 976       | -439.7  | -0.28 |         |         |
| 40    | 1009      | -442.9  | -0.81 |         |         |
| 41    | 1042      | -438.3  | -0.05 |         |         |
| 42    | 1074      | -436.4  | 0.27  |         |         |
| 43    | 1107      | -443    | -0.83 |         |         |
| 44    | 1142      | -441.9  | -0.65 |         |         |
| 45    | 1176      | -439.6  | -0.27 |         |         |
| 46    | 1211      | -441.9  | -0.65 |         |         |
| 47    | 1247      | -446.9  | -1.48 |         |         |
| 48    | 1285      | -447.9  | -1.64 |         |         |
| 49    | 1321      | -440.4  | -0.40 |         |         |
| 50    | 1356      | -436    | 0.33  |         |         |
| 51    | 1390      | -438.3  | -0.05 |         |         |
| 52    | 1426      | -438.8  | -0.13 |         |         |
| 53    | 1461      | -438.2  | -0.03 |         |         |



deutnat

|     |      |        |       |
|-----|------|--------|-------|
| 54  | 1497 | -440.8 | -0.46 |
| 55  | 1535 | -444   | -1.00 |
| 56  | 1573 | -443.8 | -0.96 |
| 57  | 1612 | -446   | -1.33 |
| 58  | 1652 | -447.1 | -1.51 |
| 59  | 1692 | -443.3 | -0.88 |
| 60  | 1732 | -444.4 | -1.06 |
| 61  | 1772 | -445.3 | -1.21 |
| 62  | 1812 | -445.5 | -1.24 |
| 63  | 1853 | -443.8 | -0.96 |
| 64  | 1893 | -441.2 | -0.53 |
| 65  | 1931 | -437.1 | 0.15  |
| 66  | 1970 | -439.7 | -0.28 |
| 67  | 2009 | -440.7 | -0.45 |
| 68  | 2049 | -440.3 | -0.38 |
| 69  | 2089 | -441.2 | -0.53 |
| 70  | 2129 | -441.7 | -0.61 |
| 71  | 2171 | -443.7 | -0.95 |
| 72  | 2212 | -442.4 | -0.73 |
| 73  | 2253 | -437.3 | 0.12  |
| 74  | 2291 | -431   | 1.16  |
| 75  | 2331 | -443.9 | -0.98 |
| 76  | 2374 | -446.7 | -1.44 |
| 77  | 2418 | -442.4 | -0.73 |
| 78  | 2460 | -441.8 | -0.63 |
| 79  | 2501 | -436.2 | 0.30  |
| 80  | 2542 | -439.6 | -0.27 |
| 81  | 2585 | -446.2 | -1.36 |
| 82  | 2628 | -439   | -0.17 |
| 83  | 2670 | -438.1 | -0.02 |
| 84  | 2713 | -445.2 | -1.19 |
| 85  | 2760 | -449.9 | -1.97 |
| 86  | 2805 | -441.7 | -0.61 |
| 87  | 2847 | -434.5 | 0.58  |
| 88  | 2889 | -440.3 | -0.38 |
| 89  | 2934 | -446.1 | -1.34 |
| 90  | 2980 | -446.5 | -1.41 |
| 91  | 3026 | -442.4 | -0.73 |
| 92  | 3070 | -439.5 | -0.25 |
| 93  | 3114 | -441.2 | -0.53 |
| 94  | 3158 | -438.5 | -0.08 |
| 95  | 3201 | -437.1 | 0.15  |
| 96  | 3245 | -440.6 | -0.43 |
| 97  | 3289 | -441.7 | -0.61 |
| 98  | 3334 | -439.8 | -0.30 |
| 99  | 3379 | -438.8 | -0.13 |
| 100 | 3422 | -436.7 | 0.22  |
| 101 | 3466 | -437   | 0.17  |
| 102 | 3511 | -443.5 | -0.91 |
| 103 | 3558 | -443.4 | -0.90 |
| 104 | 3603 | -436.2 | 0.30  |
| 105 | 3646 | -434.1 | 0.65  |
| 106 | 3689 | -434.5 | 0.58  |
| 107 | 3732 | -437.8 | 0.03  |
| 108 | 3778 | -441.8 | -0.63 |

deutnat

|     |      |         |       |
|-----|------|---------|-------|
| 109 | 3824 | -440.8  | -0.46 |
| 110 | 3870 | -438    | 0.00  |
| 111 | 3915 | -439.4  | -0.23 |
| 112 | 3962 | -442    | -0.66 |
| 113 | 4009 | -442.4  | -0.73 |
| 114 | 4057 | -442.5  | -0.75 |
| 115 | 4104 | -443.5  | -0.91 |
| 116 | 4153 | -444.6  | -1.09 |
| 117 | 4202 | -444    | -1.00 |
| 118 | 4250 | -441.2  | -0.53 |
| 119 | 4295 | -434.7  | 0.55  |
| 120 | 4339 | -431.2  | 1.13  |
| 121 | 4381 | -431.2  | 1.13  |
| 122 | 4423 | -431.2  | 1.13  |
| 123 | 4466 | -431.2  | 1.13  |
| 124 | 4509 | -431.2  | 1.13  |
| 125 | 4552 | -432.7  | 0.88  |
| 126 | 4596 | -436.8  | 0.20  |
| 127 | 4642 | -440    | -0.33 |
| 128 | 4690 | -443.3  | -0.88 |
| 129 | 4739 | -441.5  | -0.58 |
| 130 | 4786 | -436.5  | 0.25  |
| 131 | 4831 | -438    | 0.00  |
| 132 | 4880 | -444.9  | -1.14 |
| 133 | 4929 | -442    | -0.66 |
| 134 | 4977 | -440.2  | -0.36 |
| 135 | 5025 | -442    | -0.66 |
| 136 | 5072 | -437.2  | 0.13  |
| 137 | 5118 | -436.9  | 0.18  |
| 138 | 5165 | -440.3  | -0.38 |
| 139 | 5212 | -439.3  | -0.22 |
| 140 | 5259 | -436.3  | 0.28  |
| 141 | 5305 | -437.4  | 0.10  |
| 142 | 5351 | -437.5  | 0.08  |
| 143 | 5397 | -435    | 0.50  |
| 144 | 5442 | -435    | 0.50  |
| 145 | 5488 | -436.8  | 0.20  |
| 146 | 5534 | -437.9  | 0.02  |
| 147 | 5581 | -437.5  | 0.08  |
| 148 | 5627 | -437.8  | 0.03  |
| 149 | 5674 | -438.37 | -0.06 |
| 150 | 5721 | -438.93 | -0.15 |
| 151 | 5769 | -439.5  | -0.25 |
| 152 | 5816 | -439.3  | -0.22 |
| 153 | 5863 | -437.1  | 0.15  |
| 154 | 5909 | -435.3  | 0.45  |
| 155 | 5955 | -438.8  | -0.13 |
| 156 | 6004 | -442.4  | -0.73 |
| 157 | 6052 | -439.25 | -0.21 |
| 158 | 6099 | -436.1  | 0.32  |
| 159 | 6145 | -439    | -0.17 |
| 160 | 6193 | -440.2  | -0.33 |
| 161 | 6241 | -437.6  | 0.09  |
| 162 | 6287 | -436.4  | 0.28  |
| 163 | 6334 | -441.3  | -0.55 |

deutnat

|     |      |         |       |
|-----|------|---------|-------|
| 164 | 6385 | -447.5  | -1.59 |
| 165 | 6436 | -444.4  | -1.09 |
| 166 | 6486 | -439.6  | -0.31 |
| 167 | 6534 | -441.4  | -0.62 |
| 168 | 6583 | -441.5  | -0.65 |
| 169 | 6631 | -435.3  | 0.37  |
| 170 | 6677 | -435.2  | 0.37  |
| 171 | 6724 | -439.5  | -0.36 |
| 172 | 6773 | -442.3  | -0.84 |
| 173 | 6823 | -444.9  | -1.28 |
| 174 | 6874 | -444    | -1.14 |
| 175 | 6924 | -440.5  | -0.58 |
| 176 | 6973 | -440.5  | -0.59 |
| 177 | 7023 | -443.2  | -1.05 |
| 178 | 7074 | -444    | -1.20 |
| 179 | 7124 | -440.5  | -0.63 |
| 180 | 7172 | -436.5  | 0.02  |
| 181 | 7220 | -436.8  | -0.04 |
| 182 | 7267 | -437.1  | -0.11 |
| 183 | 7315 | -438.1  | -0.29 |
| 184 | 7364 | -441.2  | -0.81 |
| 185 | 7413 | -439.7  | -0.58 |
| 186 | 7462 | -436    | 0.02  |
| 187 | 7509 | -436.2  | -0.03 |
| 188 | 7555 | -433.1  | 0.48  |
| 189 | 7602 | -436    | -0.02 |
| 190 | 7649 | -435.7  | 0.02  |
| 191 | 7697 | -436    | -0.04 |
| 192 | 7745 | -440    | -0.72 |
| 193 | 7794 | -439    | -0.57 |
| 194 | 7844 | -440.9  | -0.90 |
| 195 | 7894 | -441    | -0.93 |
| 196 | 7944 | -439.5  | -0.69 |
| 197 | 7994 | -438.5  | -0.54 |
| 198 | 8043 | -439    | -0.64 |
| 199 | 8091 | -433.3  | 0.30  |
| 200 | 8135 | -422.6  | 2.06  |
| 201 | 8178 | -431.35 | 0.59  |
| 202 | 8226 | -440.1  | -0.87 |
| 203 | 8276 | -439.5  | -0.78 |
| 204 | 8325 | -438    | -0.55 |
| 205 | 8374 | -435.9  | -0.21 |
| 206 | 8422 | -436.1  | -0.26 |
| 207 | 8471 | -437.6  | -0.52 |
| 208 | 8520 | -438.3  | -0.65 |
| 209 | 8569 | -438.4  | -0.68 |
| 210 | 8619 | -438.6  | -0.73 |
| 211 | 8668 | -437.5  | -0.56 |
| 212 | 8716 | -432    | 0.34  |
| 213 | 8763 | -433.2  | 0.13  |
| 214 | 8811 | -438.8  | -0.81 |
| 215 | 8861 | -437    | -0.53 |
| 216 | 8910 | -437    | -0.54 |
| 217 | 8960 | -439    | -0.88 |
| 218 | 9009 | -436.5  | -0.48 |

deutnat

|     |       |        |       |
|-----|-------|--------|-------|
| 219 | 9058  | -436   | -0.41 |
| 220 | 9107  | -437.1 | -0.60 |
| 221 | 9156  | -436.5 | -0.51 |
| 222 | 9204  | -434.1 | -0.13 |
| 223 | 9252  | -431.7 | 0.26  |
| 224 | 9298  | -433   | 0.03  |
| 225 | 9346  | -435.5 | -0.39 |
| 226 | 9396  | -438   | -0.82 |
| 227 | 9445  | -437.2 | -0.70 |
| 228 | 9494  | -433.9 | -0.16 |
| 229 | 9542  | -433.8 | -0.16 |
| 230 | 9589  | -430.2 | 0.43  |
| 231 | 9635  | -429.6 | 0.51  |
| 232 | 9682  | -435.4 | -0.46 |
| 233 | 9732  | -437.4 | -0.80 |
| 234 | 9782  | -437.6 | -0.85 |
| 235 | 9831  | -436.9 | -0.74 |
| 236 | 9881  | -434.5 | -0.36 |
| 237 | 9929  | -434.5 | -0.37 |
| 238 | 9978  | -436.1 | -0.65 |
| 239 | 10027 | -433.8 | -0.28 |
| 240 | 10075 | -434.9 | -0.47 |
| 241 | 10124 | -435.5 | -0.58 |
| 242 | 10172 | -430   | 0.31  |
| 243 | 10218 | -428.7 | 0.52  |
| 244 | 10265 | -432.8 | -0.18 |
| 245 | 10315 | -439.5 | -1.30 |
| 246 | 10366 | -437.4 | -0.97 |
| 247 | 10415 | -434.1 | -0.43 |
| 248 | 10465 | -436   | -0.76 |
| 249 | 10515 | -436   | -0.77 |
| 250 | 10564 | -436   | -0.79 |
| 251 | 10614 | -436.6 | -0.90 |
| 252 | 10665 | -436.9 | -0.96 |
| 253 | 10715 | -435.2 | -0.70 |
| 254 | 10764 | -432.5 | -0.26 |
| 255 | 10812 | -433.5 | -0.44 |
| 256 | 10861 | -434.5 | -0.62 |
| 257 | 10910 | -431.6 | -0.15 |
| 258 | 10957 | -431.3 | -0.12 |
| 259 | 11005 | -431.9 | -0.23 |
| 260 | 11053 | -430.3 | 0.02  |
| 261 | 11100 | -429.8 | 0.09  |
| 262 | 11146 | -425.8 | 0.74  |
| 263 | 11191 | -425.3 | 0.81  |
| 264 | 11237 | -431.2 | -0.18 |
| 265 | 11286 | -433   | -0.48 |
| 266 | 11334 | -431.7 | -0.27 |
| 267 | 11383 | -434.5 | -0.73 |
| 268 | 11434 | -437.4 | -1.22 |
| 269 | 11485 | -437.8 | -1.29 |
| 270 | 11537 | -439.5 | -1.57 |
| 271 | 11590 | -439.6 | -1.59 |
| 272 | 11642 | -439.7 | -1.61 |
| 273 | 11695 | -441   | -1.83 |

deutnat

|     |       |         |       |
|-----|-------|---------|-------|
| 274 | 11749 | -443.2  | -2.20 |
| 275 | 11805 | -444.2  | -2.37 |
| 276 | 11861 | -447.1  | -2.85 |
| 277 | 11918 | -445.3  | -2.55 |
| 278 | 11973 | -443.1  | -2.19 |
| 279 | 12029 | -447    | -2.84 |
| 280 | 12087 | -448.5  | -3.09 |
| 281 | 12144 | -446.5  | -2.77 |
| 282 | 12202 | -447.3  | -2.90 |
| 283 | 12261 | -453.2  | -3.88 |
| 284 | 12323 | -455    | -4.18 |
| 285 | 12385 | -453.6  | -3.96 |
| 286 | 12446 | -451.5  | -3.61 |
| 287 | 12507 | -452.4  | -3.76 |
| 288 | 12569 | -455.3  | -4.25 |
| 289 | 12632 | -455.3  | -4.25 |
| 290 | 12694 | -453.27 | -3.91 |
| 291 | 12755 | -451.23 | -3.57 |
| 292 | 12815 | -449.2  | -3.24 |
| 293 | 12874 | -450.2  | -3.40 |
| 294 | 12934 | -450.8  | -3.50 |
| 295 | 12994 | -451.8  | -3.67 |
| 296 | 13055 | -452.9  | -3.85 |
| 297 | 13116 | -452.3  | -3.75 |
| 298 | 13177 | -452.1  | -3.72 |
| 299 | 13237 | -450.5  | -3.45 |
| 300 | 13296 | -448.8  | -3.17 |
| 301 | 13355 | -448.8  | -3.17 |
| 302 | 13414 | -451.8  | -3.67 |
| 303 | 13476 | -455.5  | -4.28 |
| 304 | 13539 | -453.9  | -4.02 |
| 305 | 13600 | -451.2  | -3.57 |
| 306 | 13659 | -449.4  | -3.27 |
| 307 | 13718 | -447.2  | -2.91 |
| 308 | 13774 | -442.9  | -2.19 |
| 309 | 13828 | -442    | -2.04 |
| 310 | 13883 | -443.2  | -2.24 |
| 311 | 13938 | -442.1  | -2.06 |
| 312 | 13992 | -443.65 | -2.32 |
| 313 | 14048 | -445.2  | -2.57 |
| 314 | 14105 | -446.75 | -2.83 |
| 315 | 14163 | -448.3  | -3.08 |
| 316 | 14221 | -449.85 | -3.34 |
| 317 | 14281 | -451.4  | -3.60 |
| 318 | 14342 | -452.95 | -3.85 |
| 319 | 14404 | -454.5  | -4.11 |
| 320 | 14466 | -451.7  | -3.64 |
| 321 | 14526 | -452.8  | -3.82 |
| 322 | 14589 | -456    | -4.34 |
| 323 | 14651 | -453.8  | -3.98 |
| 324 | 14713 | -453.5  | -3.92 |
| 325 | 14775 | -454.8  | -4.14 |
| 326 | 14839 | -457.1  | -4.52 |
| 327 | 14904 | -458.1  | -4.68 |
| 328 | 14968 | -456.7  | -4.44 |

deutnat

|     |       |         |       |
|-----|-------|---------|-------|
| 329 | 15032 | -458    | -4.66 |
| 330 | 15099 | -462    | -5.32 |
| 331 | 15167 | -462.5  | -5.40 |
| 332 | 15234 | -460.1  | -5.00 |
| 333 | 15300 | -459    | -4.81 |
| 334 | 15366 | -458.6  | -4.74 |
| 335 | 15432 | -461.1  | -5.15 |
| 336 | 15501 | -464.5  | -5.71 |
| 337 | 15570 | -463.8  | -5.60 |
| 338 | 15639 | -462.9  | -5.44 |
| 339 | 15708 | -463.7  | -5.57 |
| 340 | 15777 | -462    | -5.29 |
| 341 | 15845 | -462.4  | -5.35 |
| 342 | 15915 | -467.5  | -6.19 |
| 343 | 15987 | -466.3  | -5.99 |
| 344 | 16057 | -464.9  | -5.75 |
| 345 | 16128 | -466.9  | -6.08 |
| 346 | 16201 | -468.5  | -6.34 |
| 347 | 16275 | -470.9  | -6.74 |
| 348 | 16350 | -471.8  | -6.88 |
| 349 | 16426 | -471.8  | -6.88 |
| 350 | 16502 | -471    | -6.74 |
| 351 | 16577 | -471.2  | -6.77 |
| 352 | 16653 | -472.4  | -6.97 |
| 353 | 16729 | -473.6  | -7.16 |
| 354 | 16808 | -475.6  | -7.49 |
| 355 | 16889 | -480.7  | -8.33 |
| 356 | 16974 | -481.8  | -8.51 |
| 357 | 17058 | -479    | -8.04 |
| 358 | 17139 | -476.4  | -7.60 |
| 359 | 17219 | -476    | -7.53 |
| 360 | 17298 | -475.5  | -7.45 |
| 361 | 17379 | -479.4  | -8.09 |
| 362 | 17462 | -480.5  | -8.27 |
| 363 | 17544 | -477    | -7.68 |
| 364 | 17625 | -477.6  | -7.78 |
| 365 | 17706 | -478    | -7.84 |
| 366 | 17787 | -477.9  | -7.82 |
| 367 | 17868 | -477.3  | -7.72 |
| 368 | 17949 | -477.5  | -7.75 |
| 369 | 18031 | -480.15 | -8.19 |
| 370 | 18116 | -482.8  | -8.63 |
| 371 | 18201 | -480    | -8.16 |
| 372 | 18283 | -478.4  | -7.89 |
| 373 | 18365 | -477.5  | -7.74 |
| 374 | 18446 | -478.9  | -7.97 |
| 375 | 18530 | -482.1  | -8.50 |
| 376 | 18615 | -481.7  | -8.43 |
| 377 | 18701 | -483.5  | -8.73 |
| 378 | 18787 | -481.9  | -8.46 |
| 379 | 18870 | -476.6  | -7.58 |
| 380 | 18950 | -476.9  | -7.63 |
| 381 | 19032 | -479.8  | -8.11 |
| 382 | 19116 | -480.7  | -8.26 |
| 383 | 19199 | -479.35 | -8.03 |

deutnat

|     |       |         |       |
|-----|-------|---------|-------|
| 384 | 19282 | -478    | -7.81 |
| 385 | 19362 | -476.4  | -7.54 |
| 386 | 19443 | -477.4  | -7.70 |
| 387 | 19525 | -480.1  | -8.15 |
| 388 | 19610 | -481.9  | -8.45 |
| 389 | 19696 | -483.5  | -8.71 |
| 390 | 19782 | -482.4  | -8.52 |
| 391 | 19868 | -482.9  | -8.61 |
| 392 | 19953 | -479.2  | -7.99 |
| 393 | 20035 | -477    | -7.62 |
| 394 | 20116 | -478.3  | -7.84 |
| 395 | 20197 | -476.4  | -7.52 |
| 396 | 20278 | -478.2  | -7.82 |
| 397 | 20361 | -480    | -8.11 |
| 398 | 20444 | -479.8  | -8.08 |
| 399 | 20528 | -479.5  | -8.03 |
| 400 | 20611 | -479.6  | -8.04 |
| 401 | 20694 | -479.1  | -7.96 |
| 402 | 20777 | -478.6  | -7.87 |
| 403 | 20859 | -479    | -7.94 |
| 404 | 20943 | -480.1  | -8.12 |
| 405 | 21026 | -480    | -8.10 |
| 406 | 21110 | -479    | -7.93 |
| 407 | 21192 | -478.9  | -7.91 |
| 408 | 21275 | -478.9  | -7.91 |
| 409 | 21358 | -479.45 | -8.00 |
| 410 | 21442 | -480    | -8.09 |
| 411 | 21525 | -477.8  | -7.73 |
| 412 | 21605 | -475.6  | -7.36 |
| 413 | 21686 | -477.4  | -7.66 |
| 414 | 21769 | -480.9  | -8.24 |
| 415 | 21854 | -481.5  | -8.33 |
| 416 | 21939 | -480.2  | -8.12 |
| 417 | 22023 | -480.4  | -8.15 |
| 418 | 22108 | -482    | -8.41 |
| 419 | 22196 | -484.5  | -8.82 |
| 420 | 22284 | -484.5  | -8.82 |
| 421 | 22371 | -482.3  | -8.45 |
| 422 | 22457 | -481.4  | -8.30 |
| 423 | 22543 | -481.85 | -8.37 |
| 424 | 22629 | -482.3  | -8.45 |
| 425 | 22716 | -482.75 | -8.52 |
| 426 | 22803 | -483.2  | -8.59 |
| 427 | 22888 | -479.5  | -7.97 |
| 428 | 22972 | -479.2  | -7.92 |
| 429 | 23057 | -482.7  | -8.50 |
| 430 | 23145 | -484.5  | -8.80 |
| 431 | 23234 | -485.1  | -8.89 |
| 432 | 23324 | -485.8  | -9.01 |
| 433 | 23412 | -483    | -8.54 |
| 434 | 23497 | -478.3  | -7.76 |
| 435 | 23581 | -480.95 | -8.20 |
| 436 | 23668 | -483.6  | -8.63 |
| 437 | 23755 | -483.6  | -8.63 |
| 438 | 23843 | -483.6  | -8.63 |

deutnat

|     |       |         |       |
|-----|-------|---------|-------|
| 439 | 23931 | -482.5  | -8.44 |
| 440 | 24017 | -481.4  | -8.26 |
| 441 | 24102 | -480    | -8.03 |
| 442 | 24186 | -479.1  | -7.87 |
| 443 | 24272 | -484    | -8.68 |
| 444 | 24363 | -488.3  | -9.39 |
| 445 | 24453 | -482.7  | -8.46 |
| 446 | 24537 | -477.1  | -7.53 |
| 447 | 24619 | -477    | -7.51 |
| 448 | 24700 | -477    | -7.50 |
| 449 | 24781 | -475.5  | -7.25 |
| 450 | 24860 | -474    | -7.00 |
| 451 | 24941 | -477.45 | -7.57 |
| 452 | 25024 | -480.9  | -8.14 |
| 453 | 25109 | -480    | -7.98 |
| 454 | 25193 | -479.1  | -7.83 |
| 455 | 25277 | -478.2  | -7.68 |
| 456 | 25360 | -479.5  | -7.89 |
| 457 | 25445 | -481.8  | -8.27 |
| 458 | 25531 | -481    | -8.13 |
| 459 | 25615 | -478.4  | -7.70 |
| 460 | 25697 | -474.5  | -7.05 |
| 461 | 25776 | -474.1  | -6.98 |
| 462 | 25855 | -475.8  | -7.26 |
| 463 | 25936 | -476    | -7.29 |
| 464 | 26017 | -477.1  | -7.47 |
| 465 | 26099 | -477.2  | -7.48 |
| 466 | 26180 | -475.3  | -7.16 |
| 467 | 26261 | -475.8  | -7.24 |
| 468 | 26342 | -477.7  | -7.55 |
| 469 | 26425 | -479.3  | -7.82 |
| 470 | 26510 | -480.7  | -8.05 |
| 471 | 26595 | -481    | -8.09 |
| 472 | 26681 | -481    | -8.09 |
| 473 | 26766 | -478.9  | -7.74 |
| 474 | 26849 | -477.8  | -7.56 |
| 475 | 26933 | -479.9  | -7.90 |
| 476 | 27019 | -484.4  | -8.64 |
| 477 | 27110 | -486.7  | -9.02 |
| 478 | 27202 | -486.7  | -9.02 |
| 479 | 27293 | -485.5  | -8.82 |
| 480 | 27382 | -484.3  | -8.62 |
| 481 | 27470 | -481.4  | -8.14 |
| 482 | 27555 | -479.6  | -7.84 |
| 483 | 27641 | -482.3  | -8.28 |
| 484 | 27730 | -484.6  | -8.66 |
| 485 | 27819 | -483.8  | -8.52 |
| 486 | 27907 | -482.3  | -8.27 |
| 487 | 27993 | -481.2  | -8.09 |
| 488 | 28079 | -480.1  | -7.90 |
| 489 | 28163 | -478.85 | -7.69 |
| 490 | 28247 | -477.6  | -7.49 |
| 491 | 28331 | -481.7  | -8.16 |
| 492 | 28420 | -485.7  | -8.82 |
| 493 | 28510 | -483.58 | -8.47 |



|     |       |         |       |
|-----|-------|---------|-------|
| 494 | 28597 | -481.47 | -8.12 |
| 495 | 28683 | -479.35 | -7.77 |
| 496 | 28766 | -477.23 | -7.42 |
| 497 | 28848 | -475.12 | -7.07 |
| 498 | 28927 | -473    | -6.71 |
| 499 | 29006 | -473    | -6.71 |
| 500 | 29085 | -474.62 | -6.98 |
| 501 | 29166 | -476.24 | -7.25 |
| 502 | 29249 | -477.86 | -7.52 |
| 503 | 29332 | -479.48 | -7.79 |
| 504 | 29418 | -481.1  | -8.05 |
| 505 | 29505 | -482.9  | -8.35 |
| 506 | 29594 | -483    | -8.37 |
| 507 | 29682 | -482.8  | -8.33 |
| 508 | 29771 | -484.3  | -8.58 |
| 509 | 29861 | -483.4  | -8.43 |
| 510 | 29949 | -482.6  | -8.30 |
| 511 | 30036 | -480.5  | -7.95 |
| 512 | 30120 | -475.6  | -7.14 |
| 513 | 30201 | -474.9  | -7.02 |
| 514 | 30283 | -478.5  | -7.62 |
| 515 | 30368 | -479.8  | -7.83 |
| 516 | 30453 | -479.3  | -7.75 |
| 517 | 30538 | -478.63 | -7.64 |
| 518 | 30622 | -477.95 | -7.52 |
| 519 | 30705 | -477.27 | -7.41 |
| 520 | 30788 | -476.6  | -7.30 |
| 521 | 30871 | -478.6  | -7.63 |
| 522 | 30957 | -480.5  | -7.95 |
| 523 | 31043 | -480.8  | -8.00 |
| 524 | 31130 | -481.1  | -8.05 |
| 525 | 31216 | -479.9  | -7.85 |
| 526 | 31302 | -478.7  | -7.65 |
| 527 | 31387 | -479.4  | -7.77 |
| 528 | 31473 | -481    | -8.03 |
| 529 | 31560 | -482    | -8.20 |
| 530 | 31648 | -480.4  | -7.93 |
| 531 | 31733 | -477.2  | -7.40 |
| 532 | 31815 | -475.6  | -7.14 |
| 533 | 31896 | -473.4  | -6.77 |
| 534 | 31976 | -473.2  | -6.74 |
| 535 | 32056 | -473.5  | -6.79 |
| 536 | 32137 | -475.3  | -7.09 |
| 537 | 32219 | -476.4  | -7.27 |
| 538 | 32300 | -472.4  | -6.61 |
| 539 | 32380 | -475.2  | -7.07 |
| 540 | 32463 | -477.7  | -7.49 |
| 541 | 32546 | -474.7  | -6.99 |
| 542 | 32626 | -472.5  | -6.62 |
| 543 | 32705 | -473    | -6.71 |
| 544 | 32787 | -477.6  | -7.47 |
| 545 | 32871 | -477.6  | -7.47 |
| 546 | 32955 | -476.5  | -7.29 |
| 547 | 33039 | -478.3  | -7.59 |
| 548 | 33124 | -478.4  | -7.60 |

deutnat

|     |       |         |       |
|-----|-------|---------|-------|
| 549 | 33209 | -478.4  | -7.60 |
| 550 | 33293 | -476.8  | -7.34 |
| 551 | 33376 | -475.2  | -7.07 |
| 552 | 33459 | -477.4  | -7.44 |
| 553 | 33544 | -478    | -7.54 |
| 554 | 33628 | -476.6  | -7.31 |
| 555 | 33711 | -475.5  | -7.12 |
| 556 | 33793 | -475.8  | -7.17 |
| 557 | 33877 | -476.9  | -7.36 |
| 558 | 33960 | -475.8  | -7.17 |
| 559 | 34041 | -471.9  | -6.53 |
| 560 | 34121 | -474    | -6.88 |
| 561 | 34202 | -473.3  | -6.76 |
| 562 | 34281 | -470.2  | -6.25 |
| 563 | 34360 | -472.3  | -6.59 |
| 564 | 34438 | -469.2  | -6.08 |
| 565 | 34515 | -468.8  | -6.01 |
| 566 | 34592 | -469.6  | -6.15 |
| 567 | 34669 | -467.9  | -5.87 |
| 568 | 34744 | -466.9  | -5.70 |
| 569 | 34818 | -463.5  | -5.14 |
| 570 | 34889 | -461.6  | -4.82 |
| 571 | 34960 | -463    | -5.05 |
| 572 | 35033 | -465.8  | -5.52 |
| 573 | 35108 | -468.6  | -5.98 |
| 574 | 35185 | -468.1  | -5.90 |
| 575 | 35261 | -467.6  | -5.82 |
| 576 | 35336 | -465    | -5.39 |
| 577 | 35409 | -464.1  | -5.24 |
| 578 | 35482 | -464.9  | -5.37 |
| 579 | 35556 | -466    | -5.55 |
| 580 | 35631 | -466.6  | -5.65 |
| 581 | 35705 | -465.1  | -5.41 |
| 582 | 35780 | -466.4  | -5.62 |
| 583 | 35855 | -467    | -5.72 |
| 584 | 35930 | -467.3  | -5.77 |
| 585 | 36007 | -470    | -6.22 |
| 586 | 36086 | -471.1  | -6.40 |
| 587 | 36166 | -472.9  | -6.70 |
| 588 | 36248 | -474.9  | -7.03 |
| 589 | 36331 | -476    | -7.22 |
| 590 | 36416 | -478.9  | -7.70 |
| 591 | 36502 | -476.5  | -7.30 |
| 592 | 36585 | -472.7  | -6.67 |
| 593 | 36666 | -474.5  | -6.97 |
| 594 | 36748 | -472.6  | -6.65 |
| 595 | 36827 | -468.8  | -6.02 |
| 596 | 36905 | -470.6  | -6.32 |
| 597 | 36985 | -472.4  | -6.62 |
| 598 | 37066 | -473.25 | -6.76 |
| 599 | 37148 | -474.1  | -6.90 |
| 600 | 37230 | -474.1  | -6.90 |
| 601 | 37313 | -474.5  | -6.97 |
| 602 | 37396 | -475.9  | -7.20 |
| 603 | 37479 | -473.5  | -6.80 |

deutnat

|     |       |         |       |
|-----|-------|---------|-------|
| 604 | 37558 | -468.5  | -5.97 |
| 605 | 37637 | -471    | -6.38 |
| 606 | 37718 | -474    | -6.88 |
| 607 | 37799 | -472.3  | -6.60 |
| 608 | 37880 | -471.4  | -6.45 |
| 609 | 37959 | -470.5  | -6.30 |
| 610 | 38039 | -471.3  | -6.43 |
| 611 | 38120 | -472.7  | -6.66 |
| 612 | 38201 | -473.5  | -6.80 |
| 613 | 38284 | -474.5  | -6.96 |
| 614 | 38367 | -475.3  | -7.09 |
| 615 | 38451 | -475.8  | -7.18 |
| 616 | 38535 | -475.8  | -7.18 |
| 617 | 38619 | -474.4  | -6.94 |
| 618 | 38702 | -473.1  | -6.73 |
| 619 | 38783 | -472.85 | -6.69 |
| 620 | 38865 | -472.6  | -6.64 |
| 621 | 38946 | -472.35 | -6.60 |
| 622 | 39027 | -472.1  | -6.56 |
| 623 | 39107 | -470    | -6.21 |
| 624 | 39185 | -468.3  | -5.93 |
| 625 | 39263 | -468.3  | -5.93 |
| 626 | 39341 | -469.7  | -6.16 |
| 627 | 39420 | -470.2  | -6.24 |
| 628 | 39499 | -470.2  | -6.24 |
| 629 | 39579 | -469.5  | -6.13 |
| 630 | 39657 | -469.5  | -6.13 |
| 631 | 39735 | -468.2  | -5.91 |
| 632 | 39812 | -465.6  | -5.48 |
| 633 | 39889 | -470.2  | -6.24 |
| 634 | 39971 | -474.5  | -6.96 |
| 635 | 40054 | -474.2  | -6.91 |
| 636 | 40138 | -476    | -7.21 |
| 637 | 40223 | -475.2  | -7.07 |
| 638 | 40305 | -470.6  | -6.31 |
| 639 | 40386 | -471.8  | -6.51 |
| 640 | 40468 | -474.2  | -6.91 |
| 641 | 40551 | -473    | -6.71 |
| 642 | 40632 | -472.1  | -6.56 |
| 643 | 40714 | -472.8  | -6.67 |
| 644 | 40796 | -471.5  | -6.46 |
| 645 | 40875 | -467.2  | -5.74 |
| 646 | 40952 | -467.2  | -5.74 |
| 647 | 41031 | -471    | -6.37 |
| 648 | 41112 | -472.3  | -6.59 |
| 649 | 41191 | -468.1  | -5.89 |
| 650 | 41268 | -463.9  | -5.19 |
| 651 | 41342 | -463.4  | -5.11 |
| 652 | 41415 | -462.9  | -5.02 |
| 653 | 41489 | -463.3  | -5.09 |
| 654 | 41564 | -465.7  | -5.48 |
| 655 | 41638 | -461.6  | -4.80 |
| 656 | 41710 | -460    | -4.53 |
| 657 | 41782 | -463.3  | -5.08 |
| 658 | 41855 | -461.7  | -4.81 |

deutnat

|     |       |        |       |
|-----|-------|--------|-------|
| 659 | 41927 | -460.9 | -4.68 |
| 660 | 42001 | -464.5 | -5.27 |
| 661 | 42077 | -467   | -5.69 |
| 662 | 42152 | -462.8 | -4.99 |
| 663 | 42225 | -460.8 | -4.65 |
| 664 | 42298 | -464.7 | -5.30 |
| 665 | 42374 | -467.1 | -5.70 |
| 666 | 42451 | -465.3 | -5.40 |
| 667 | 42527 | -465.9 | -5.49 |
| 668 | 42603 | -465.5 | -5.43 |
| 669 | 42679 | -467.1 | -5.69 |
| 670 | 42758 | -469.8 | -6.13 |
| 671 | 42837 | -468.7 | -5.95 |
| 672 | 42916 | -468.3 | -5.88 |
| 673 | 42994 | -468.6 | -5.93 |
| 674 | 43073 | -467.8 | -5.80 |
| 675 | 43150 | -466.2 | -5.53 |
| 676 | 43226 | -466   | -5.50 |
| 677 | 43304 | -469.3 | -6.04 |
| 678 | 43385 | -471.8 | -6.45 |
| 679 | 43464 | -465.6 | -5.42 |
| 680 | 43540 | -465.9 | -5.47 |
| 681 | 43619 | -473.2 | -6.68 |
| 682 | 43702 | -472.7 | -6.60 |
| 683 | 43785 | -472   | -6.48 |
| 684 | 43868 | -474.8 | -6.94 |
| 685 | 43952 | -474.4 | -6.88 |
| 686 | 44036 | -473.5 | -6.72 |
| 687 | 44120 | -475.1 | -6.99 |
| 688 | 44206 | -476.8 | -7.27 |
| 689 | 44292 | -474.8 | -6.94 |
| 690 | 44377 | -475   | -6.97 |
| 691 | 44463 | -478.3 | -7.51 |
| 692 | 44551 | -476   | -7.13 |
| 693 | 44634 | -470.1 | -6.15 |
| 694 | 44715 | -472.5 | -6.55 |
| 695 | 44800 | -477.9 | -7.44 |
| 696 | 44887 | -475.5 | -7.04 |
| 697 | 44972 | -473.3 | -6.68 |
| 698 | 45055 | -473.6 | -6.72 |
| 699 | 45139 | -473.4 | -6.69 |
| 700 | 45225 | -477.7 | -7.40 |
| 701 | 45315 | -482.3 | -8.16 |
| 702 | 45407 | -480.8 | -7.91 |
| 703 | 45497 | -479.2 | -7.64 |
| 704 | 45587 | -481   | -7.94 |
| 705 | 45677 | -477.6 | -7.38 |
| 706 | 45762 | -472.6 | -6.55 |
| 707 | 45846 | -474.9 | -6.93 |
| 708 | 45932 | -475.4 | -7.01 |
| 709 | 46018 | -475.5 | -7.02 |
| 710 | 46104 | -477.7 | -7.39 |
| 711 | 46193 | -477.7 | -7.38 |
| 712 | 46281 | -478.2 | -7.47 |
| 713 | 46370 | -478.5 | -7.51 |

## deutnat

|     |       |        |       |
|-----|-------|--------|-------|
| 714 | 46457 | -476.3 | -7.15 |
| 715 | 46543 | -474.1 | -6.78 |
| 716 | 46628 | -474.8 | -6.90 |
| 717 | 46713 | -474.9 | -6.91 |
| 718 | 46797 | -472.3 | -6.48 |
| 719 | 46881 | -473.7 | -6.71 |
| 720 | 46966 | -475   | -6.92 |
| 721 | 47050 | -473.5 | -6.67 |
| 722 | 47133 | -471.2 | -6.29 |
| 723 | 47214 | -469   | -5.92 |
| 724 | 47295 | -470.5 | -6.17 |
| 725 | 47378 | -473.9 | -6.73 |
| 726 | 47462 | -472.8 | -6.55 |
| 727 | 47546 | -474.2 | -6.78 |
| 728 | 47631 | -475.5 | -6.99 |
| 729 | 47716 | -471.7 | -6.36 |
| 730 | 47798 | -471.2 | -6.28 |
| 731 | 47881 | -474   | -6.74 |
| 732 | 47966 | -474.7 | -6.85 |
| 733 | 48050 | -472.3 | -6.46 |
| 734 | 48134 | -473.5 | -6.65 |
| 735 | 48218 | -472.5 | -6.49 |
| 736 | 48300 | -469.7 | -6.02 |
| 737 | 48381 | -469.9 | -6.05 |
| 738 | 48461 | -468.4 | -5.80 |
| 739 | 48541 | -468.6 | -5.83 |
| 740 | 48622 | -471.2 | -6.26 |
| 741 | 48704 | -471.8 | -6.36 |
| 742 | 48787 | -472.5 | -6.48 |
| 743 | 48870 | -472   | -6.39 |
| 744 | 48953 | -471.1 | -6.24 |
| 745 | 49034 | -468.2 | -5.76 |
| 746 | 49113 | -468.3 | -5.77 |
| 747 | 49193 | -469   | -5.89 |
| 748 | 49272 | -466.7 | -5.51 |
| 749 | 49350 | -466.7 | -5.51 |
| 750 | 49430 | -469   | -5.89 |
| 751 | 49510 | -469.5 | -5.97 |
| 752 | 49591 | -470.1 | -6.07 |
| 753 | 49672 | -468.3 | -5.78 |
| 754 | 49750 | -465.4 | -5.30 |
| 755 | 49828 | -467.1 | -5.58 |
| 756 | 49907 | -467.2 | -5.60 |
| 757 | 49985 | -464.7 | -5.18 |
| 758 | 50061 | -463.8 | -5.03 |
| 759 | 50138 | -466.3 | -5.45 |
| 760 | 50217 | -467.8 | -5.70 |
| 761 | 50295 | -465.8 | -5.37 |
| 762 | 50374 | -466.8 | -5.54 |
| 763 | 50452 | -466.8 | -5.54 |
| 764 | 50531 | -467.5 | -5.65 |
| 765 | 50610 | -467   | -5.57 |
| 766 | 50688 | -464.7 | -5.19 |
| 767 | 50766 | -467.9 | -5.72 |
| 768 | 50847 | -470   | -6.07 |

## deutnat

|     |       |         |       |
|-----|-------|---------|-------|
| 769 | 50928 | -468.9  | -5.89 |
| 770 | 51009 | -468    | -5.74 |
| 771 | 51086 | -463    | -4.91 |
| 772 | 51159 | -456.1  | -3.77 |
| 773 | 51230 | -459.5  | -4.34 |
| 774 | 51306 | -465.8  | -5.38 |
| 775 | 51384 | -467.1  | -5.60 |
| 776 | 51465 | -470.8  | -6.21 |
| 777 | 51549 | -473.1  | -6.60 |
| 778 | 51633 | -472.1  | -6.43 |
| 779 | 51715 | -466.3  | -5.47 |
| 780 | 51794 | -467    | -5.59 |
| 781 | 51874 | -469.6  | -6.02 |
| 782 | 51955 | -466.8  | -5.56 |
| 783 | 52034 | -466.8  | -5.56 |
| 784 | 52114 | -468.3  | -5.81 |
| 785 | 52195 | -468.5  | -5.84 |
| 786 | 52275 | -466.7  | -5.55 |
| 787 | 52352 | -463.6  | -5.03 |
| 788 | 52430 | -467    | -5.60 |
| 789 | 52511 | -470.2  | -6.13 |
| 790 | 52594 | -470.8  | -6.23 |
| 791 | 52679 | -473.7  | -6.71 |
| 792 | 52763 | -470.3  | -6.15 |
| 793 | 52846 | -470    | -6.10 |
| 794 | 52931 | -475    | -6.93 |
| 795 | 53019 | -476.5  | -7.18 |
| 796 | 53107 | -475.8  | -7.07 |
| 797 | 53193 | -471.5  | -6.36 |
| 798 | 53275 | -467.2  | -5.65 |
| 799 | 53355 | -466.6  | -5.55 |
| 800 | 53436 | -469.6  | -6.05 |
| 801 | 53520 | -473.2  | -6.65 |
| 802 | 53606 | -473.2  | -6.65 |
| 803 | 53692 | -472.6  | -6.55 |
| 804 | 53775 | -469.5  | -6.04 |
| 805 | 53858 | -470.6  | -6.22 |
| 806 | 53942 | -472.2  | -6.49 |
| 807 | 54026 | -470.1  | -6.14 |
| 808 | 54111 | -472.85 | -6.60 |
| 809 | 54198 | -475.6  | -7.06 |
| 810 | 54286 | -475    | -6.96 |
| 811 | 54372 | -471.6  | -6.40 |
| 812 | 54457 | -472.4  | -6.53 |
| 813 | 54544 | -474    | -6.80 |
| 814 | 54629 | -470.2  | -6.17 |
| 815 | 54713 | -471.3  | -6.35 |
| 816 | 54797 | -470.9  | -6.29 |
| 817 | 54881 | -471.3  | -6.36 |
| 818 | 54967 | -473.4  | -6.71 |
| 819 | 55052 | -471    | -6.31 |
| 820 | 55136 | -470.1  | -6.16 |
| 821 | 55218 | -466.6  | -5.58 |
| 822 | 55297 | -465.1  | -5.34 |
| 823 | 55377 | -467    | -5.65 |

deutnat

|     |       |        |       |
|-----|-------|--------|-------|
| 824 | 55457 | -465.6 | -5.42 |
| 825 | 55536 | -464.3 | -5.21 |
| 826 | 55615 | -465.6 | -5.43 |
| 827 | 55694 | -466.3 | -5.54 |
| 828 | 55775 | -467.9 | -5.81 |
| 829 | 55855 | -464.4 | -5.23 |
| 830 | 55933 | -461.8 | -4.80 |
| 831 | 56009 | -463.5 | -5.09 |
| 832 | 56087 | -462.7 | -4.95 |
| 833 | 56163 | -461.2 | -4.71 |
| 834 | 56239 | -462.5 | -4.92 |
| 835 | 56317 | -463.6 | -5.11 |
| 836 | 56394 | -461.5 | -4.76 |
| 837 | 56471 | -463.5 | -5.09 |
| 838 | 56548 | -463.5 | -5.10 |
| 839 | 56624 | -459   | -4.35 |
| 840 | 56698 | -459.4 | -4.42 |
| 841 | 56774 | -462.2 | -4.88 |
| 842 | 56850 | -459.7 | -4.47 |
| 843 | 56922 | -455.1 | -3.71 |
| 844 | 56993 | -454.9 | -3.68 |
| 845 | 57065 | -457.9 | -4.18 |
| 846 | 57139 | -460.1 | -4.54 |
| 847 | 57215 | -461.2 | -4.73 |
| 848 | 57289 | -456.9 | -4.01 |
| 849 | 57362 | -457.1 | -4.05 |
| 850 | 57436 | -461.9 | -4.85 |
| 851 | 57513 | -461.9 | -4.85 |
| 852 | 57590 | -462   | -4.86 |
| 853 | 57669 | -467.5 | -5.78 |
| 854 | 57750 | -465.9 | -5.51 |
| 855 | 57828 | -460.7 | -4.65 |
| 856 | 57905 | -462.7 | -4.98 |
| 857 | 57981 | -460.7 | -4.65 |
| 858 | 58057 | -460.5 | -4.62 |
| 859 | 58133 | -462.2 | -4.90 |
| 860 | 58211 | -462.6 | -4.96 |
| 861 | 58286 | -458.4 | -4.27 |
| 862 | 58360 | -458.1 | -4.22 |
| 863 | 58436 | -462.4 | -4.93 |
| 864 | 58514 | -464.1 | -5.21 |
| 865 | 58594 | -466.8 | -5.66 |
| 866 | 58676 | -468   | -5.86 |
| 867 | 58759 | -469.2 | -6.06 |
| 868 | 58842 | -468.4 | -5.93 |
| 869 | 58925 | -467.9 | -5.85 |
| 870 | 59008 | -469.1 | -6.04 |
| 871 | 59093 | -471.3 | -6.41 |
| 872 | 59178 | -470.7 | -6.31 |
| 873 | 59262 | -468   | -5.86 |
| 874 | 59345 | -467.9 | -5.85 |
| 875 | 59428 | -469   | -6.03 |
| 876 | 59511 | -468   | -5.86 |
| 877 | 59593 | -466   | -5.53 |
| 878 | 59674 | -466   | -5.53 |

deutnat

|     |       |        |       |
|-----|-------|--------|-------|
| 879 | 59755 | -466   | -5.53 |
| 880 | 59836 | -467.7 | -5.81 |
| 881 | 59921 | -471.8 | -6.49 |
| 882 | 60007 | -472   | -6.53 |
| 883 | 60093 | -469.7 | -6.15 |
| 884 | 60177 | -469.5 | -6.11 |
| 885 | 60262 | -470   | -6.20 |
| 886 | 60348 | -471.5 | -6.45 |
| 887 | 60433 | -470.6 | -6.30 |
| 888 | 60519 | -470.5 | -6.28 |
| 889 | 60605 | -472   | -6.53 |
| 890 | 60692 | -472.3 | -6.58 |
| 891 | 60779 | -472.5 | -6.61 |
| 892 | 60869 | -476.7 | -7.31 |
| 893 | 60961 | -477.7 | -7.48 |
| 894 | 61052 | -474.7 | -6.98 |
| 895 | 61141 | -473.7 | -6.81 |
| 896 | 61229 | -472   | -6.53 |
| 897 | 61317 | -474.1 | -6.88 |
| 898 | 61406 | -474   | -6.86 |
| 899 | 61496 | -474.8 | -7.00 |
| 900 | 61586 | -476.4 | -7.26 |
| 901 | 61677 | -474   | -6.86 |
| 902 | 61765 | -471.8 | -6.50 |
| 903 | 61852 | -472.4 | -6.60 |
| 904 | 61941 | -474.8 | -7.00 |
| 905 | 62031 | -475.4 | -7.10 |
| 906 | 62121 | -475.1 | -7.05 |
| 907 | 62213 | -477.5 | -7.44 |
| 908 | 62307 | -479.2 | -7.72 |
| 909 | 62401 | -478.7 | -7.64 |
| 910 | 62497 | -481.4 | -8.09 |
| 911 | 62594 | -481   | -8.02 |
| 912 | 62689 | -478.9 | -7.67 |
| 913 | 62783 | -478.1 | -7.54 |
| 914 | 62877 | -477.9 | -7.51 |
| 915 | 62970 | -477.9 | -7.51 |
| 916 | 63064 | -477.9 | -7.51 |
| 917 | 63157 | -477.9 | -7.51 |
| 918 | 63249 | -475.5 | -7.11 |
| 919 | 63338 | -471.4 | -6.43 |
| 920 | 63424 | -470.4 | -6.26 |
| 921 | 63512 | -473.9 | -6.84 |
| 922 | 63600 | -472.8 | -6.66 |
| 923 | 63688 | -471.3 | -6.41 |
| 924 | 63776 | -473.8 | -6.83 |
| 925 | 63865 | -473.8 | -6.82 |
| 926 | 63954 | -473.6 | -6.79 |
| 927 | 64043 | -474.5 | -6.94 |
| 928 | 64134 | -476.5 | -7.27 |
| 929 | 64228 | -479.1 | -7.70 |
| 930 | 64322 | -478.2 | -7.55 |
| 931 | 64416 | -477.3 | -7.40 |
| 932 | 64510 | -480.4 | -7.91 |
| 933 | 64605 | -477.5 | -7.43 |



deutnat

|     |       |        |       |
|-----|-------|--------|-------|
| 934 | 64698 | -477.9 | -7.49 |
| 935 | 64793 | -480.8 | -7.97 |
| 936 | 64890 | -480.5 | -7.92 |
| 937 | 64987 | -482   | -8.17 |
| 938 | 65085 | -480.9 | -7.98 |
| 939 | 65182 | -480.7 | -7.95 |
| 940 | 65278 | -479.6 | -7.76 |
| 941 | 65371 | -476.5 | -7.25 |
| 942 | 65464 | -478   | -7.49 |
| 943 | 65559 | -479.3 | -7.71 |
| 944 | 65655 | -482   | -8.15 |
| 945 | 65756 | -486.2 | -8.85 |
| 946 | 65855 | -479.6 | -7.75 |
| 947 | 65949 | -477.5 | -7.40 |
| 948 | 66045 | -482.4 | -8.21 |
| 949 | 66144 | -483   | -8.31 |
| 950 | 66243 | -481.5 | -8.06 |
| 951 | 66338 | -477.1 | -7.33 |
| 952 | 66429 | -474.4 | -6.88 |
| 953 | 66520 | -475.6 | -7.07 |
| 954 | 66613 | -479.6 | -7.73 |
| 955 | 66708 | -479.8 | -7.76 |
| 956 | 66803 | -478.5 | -7.54 |
| 957 | 66898 | -479.7 | -7.73 |
| 958 | 66992 | -478   | -7.44 |
| 959 | 67085 | -476.7 | -7.22 |
| 960 | 67178 | -478.2 | -7.47 |
| 961 | 67272 | -479.2 | -7.63 |
| 962 | 67367 | -478.6 | -7.52 |
| 963 | 67462 | -480.3 | -7.80 |
| 964 | 67557 | -479.8 | -7.71 |
| 965 | 67653 | -480.7 | -7.86 |
| 966 | 67750 | -482.5 | -8.15 |
| 967 | 67848 | -481.9 | -8.04 |
| 968 | 67945 | -481   | -7.89 |
| 969 | 68041 | -479   | -7.55 |
| 970 | 68136 | -480.5 | -7.80 |
| 971 | 68233 | -483.4 | -8.27 |
| 972 | 68330 | -479.7 | -7.65 |
| 973 | 68424 | -478.5 | -7.45 |
| 974 | 68520 | -481.9 | -8.01 |
| 975 | 68617 | -481.5 | -7.94 |
| 976 | 68715 | -483.1 | -8.20 |
| 977 | 68811 | -479.5 | -7.59 |
| 978 | 68902 | -472.1 | -6.36 |
| 979 | 68987 | -468.8 | -5.81 |
| 980 | 69071 | -470.7 | -6.12 |
| 981 | 69155 | -467.7 | -5.62 |
| 982 | 69238 | -468.5 | -5.75 |
| 983 | 69324 | -474.2 | -6.69 |
| 984 | 69413 | -475.6 | -6.92 |
| 985 | 69506 | -479.4 | -7.54 |
| 986 | 69599 | -478.1 | -7.33 |
| 987 | 69691 | -476   | -6.97 |
| 988 | 69780 | -473.5 | -6.55 |

## deutnat

|      |       |        |       |
|------|-------|--------|-------|
| 989  | 69869 | -474.7 | -6.75 |
| 990  | 69959 | -478.1 | -7.31 |
| 991  | 70054 | -481.3 | -7.84 |
| 992  | 70149 | -480.6 | -7.72 |
| 993  | 70243 | -476.6 | -7.05 |
| 994  | 70334 | -476.8 | -7.08 |
| 995  | 70425 | -477.9 | -7.26 |
| 996  | 70515 | -473.5 | -6.52 |
| 997  | 70600 | -468.4 | -5.67 |
| 998  | 70683 | -468.4 | -5.67 |
| 999  | 70766 | -468.4 | -5.67 |
| 1000 | 70848 | -468.4 | -5.66 |
| 1001 | 70931 | -468.4 | -5.66 |
| 1002 | 71013 | -468.7 | -5.70 |
| 1003 | 71096 | -469   | -5.75 |
| 1004 | 71180 | -470.1 | -5.93 |
| 1005 | 71264 | -470.5 | -5.99 |
| 1006 | 71347 | -467.2 | -5.44 |
| 1007 | 71427 | -465.5 | -5.15 |
| 1008 | 71506 | -462.2 | -4.60 |
| 1009 | 71584 | -466.4 | -5.30 |
| 1010 | 71664 | -465.8 | -5.20 |
| 1011 | 71743 | -463.5 | -4.81 |
| 1012 | 71822 | -466.8 | -5.36 |
| 1013 | 71905 | -471.5 | -6.13 |
| 1014 | 71989 | -468   | -5.55 |
| 1015 | 72070 | -467   | -5.38 |
| 1016 | 72152 | -468.9 | -5.69 |
| 1017 | 72235 | -469.6 | -5.81 |
| 1018 | 72318 | -469.7 | -5.82 |
| 1019 | 72403 | -472.5 | -6.28 |
| 1020 | 72489 | -474   | -6.53 |
| 1021 | 72578 | -476.2 | -6.89 |
| 1022 | 72666 | -473.2 | -6.39 |
| 1023 | 72753 | -474.7 | -6.64 |
| 1024 | 72840 | -470.7 | -5.97 |
| 1025 | 72922 | -466.6 | -5.29 |
| 1026 | 73003 | -469.5 | -5.77 |
| 1027 | 73087 | -470.9 | -6.00 |
| 1028 | 73172 | -472.8 | -6.31 |
| 1029 | 73258 | -473.6 | -6.44 |
| 1030 | 73347 | -477.6 | -7.10 |
| 1031 | 73440 | -481.9 | -7.81 |
| 1032 | 73533 | -476.8 | -6.96 |
| 1033 | 73620 | -471.6 | -6.10 |
| 1034 | 73706 | -474.7 | -6.61 |
| 1035 | 73795 | -477.8 | -7.12 |
| 1036 | 73885 | -476.2 | -6.85 |
| 1037 | 73973 | -473.8 | -6.45 |
| 1038 | 74060 | -474.5 | -6.56 |
| 1039 | 74150 | -478.2 | -7.17 |
| 1040 | 74238 | -473   | -6.31 |
| 1041 | 74322 | -470.6 | -5.91 |
| 1042 | 74405 | -468.9 | -5.62 |
| 1043 | 74484 | -463.6 | -4.74 |

deutnat

|      |       |        |       |
|------|-------|--------|-------|
| 1044 | 74565 | -471.4 | -6.03 |
| 1045 | 74651 | -476.8 | -6.92 |
| 1046 | 74738 | -470.5 | -5.87 |
| 1047 | 74821 | -470.4 | -5.85 |
| 1048 | 74903 | -469.4 | -5.68 |
| 1049 | 74985 | -469   | -5.61 |
| 1050 | 75066 | -467.8 | -5.41 |
| 1051 | 75147 | -469.7 | -5.72 |
| 1052 | 75229 | -467.9 | -5.42 |
| 1053 | 75308 | -466.1 | -5.12 |
| 1054 | 75388 | -467.3 | -5.32 |
| 1055 | 75468 | -467.9 | -5.41 |
| 1056 | 75547 | -466.2 | -5.13 |
| 1057 | 75625 | -463.4 | -4.66 |
| 1058 | 75701 | -462.6 | -4.53 |
| 1059 | 75776 | -461.8 | -4.39 |
| 1060 | 75850 | -461.6 | -4.35 |
| 1061 | 75928 | -468   | -5.41 |
| 1062 | 76007 | -465.5 | -5.00 |
| 1063 | 76084 | -464.5 | -4.83 |
| 1064 | 76162 | -466.9 | -5.23 |
| 1065 | 76239 | -461.7 | -4.37 |
| 1066 | 76313 | -459.8 | -4.05 |
| 1067 | 76388 | -464.3 | -4.80 |
| 1068 | 76465 | -466   | -5.08 |
| 1069 | 76543 | -466.5 | -5.16 |
| 1070 | 76622 | -466.9 | -5.22 |
| 1071 | 76700 | -465.1 | -4.92 |
| 1072 | 76777 | -463.6 | -4.67 |
| 1073 | 76854 | -466.1 | -5.09 |
| 1074 | 76933 | -468.6 | -5.50 |
| 1075 | 77014 | -468.4 | -5.47 |
| 1076 | 77094 | -468.1 | -5.42 |
| 1077 | 77175 | -471   | -5.90 |
| 1078 | 77259 | -473.6 | -6.33 |
| 1079 | 77345 | -475.9 | -6.71 |
| 1080 | 77433 | -478.5 | -7.14 |
| 1081 | 77521 | -475.2 | -6.59 |
| 1082 | 77606 | -470.5 | -5.81 |
| 1083 | 77687 | -470.2 | -5.76 |
| 1084 | 77769 | -470.5 | -5.81 |
| 1085 | 77853 | -474.4 | -6.45 |
| 1086 | 77938 | -474.8 | -6.52 |
| 1087 | 78025 | -475.4 | -6.62 |
| 1088 | 78113 | -479.4 | -7.28 |
| 1089 | 78200 | -472   | -6.06 |
| 1090 | 78277 | -458.5 | -3.82 |
| 1091 | 78353 | -469.9 | -5.71 |
| 1092 | 78437 | -476.4 | -6.79 |
| 1093 | 78522 | -472.4 | -6.12 |
| 1094 | 78606 | -473.6 | -6.32 |
| 1095 | 78690 | -472   | -6.06 |
| 1096 | 78772 | -470.3 | -5.78 |
| 1097 | 78854 | -470.9 | -5.87 |
| 1098 | 78937 | -473.1 | -6.24 |

deutnat

|      |       |        |       |
|------|-------|--------|-------|
| 1099 | 79020 | -471.1 | -5.91 |
| 1100 | 79098 | -464.4 | -4.80 |
| 1101 | 79174 | -464.4 | -4.80 |
| 1102 | 79251 | -465.6 | -5.00 |
| 1103 | 79327 | -464.2 | -4.76 |
| 1104 | 79402 | -461.6 | -4.33 |
| 1105 | 79478 | -468.2 | -5.43 |
| 1106 | 79557 | -468.6 | -5.50 |
| 1107 | 79636 | -467   | -5.23 |
| 1108 | 79714 | -465.2 | -4.93 |
| 1109 | 79791 | -467.3 | -5.28 |
| 1110 | 79870 | -468.1 | -5.41 |
| 1111 | 79947 | -465.3 | -4.95 |
| 1112 | 80020 | -457.5 | -3.66 |
| 1113 | 80093 | -464.8 | -4.87 |
| 1114 | 80173 | -473.9 | -6.38 |
| 1115 | 80257 | -472.3 | -6.11 |
| 1116 | 80341 | -474   | -6.39 |
| 1117 | 80422 | -468.1 | -5.41 |
| 1118 | 80498 | -462.3 | -4.45 |
| 1119 | 80572 | -461.1 | -4.25 |
| 1120 | 80645 | -462   | -4.40 |
| 1121 | 80719 | -464.1 | -4.75 |
| 1122 | 80794 | -464.1 | -4.75 |
| 1123 | 80869 | -462.6 | -4.50 |
| 1124 | 80943 | -463.6 | -4.67 |
| 1125 | 81019 | -465.2 | -4.93 |
| 1126 | 81096 | -466.8 | -5.20 |
| 1127 | 81170 | -459.8 | -4.04 |
| 1128 | 81240 | -455.3 | -3.29 |
| 1129 | 81309 | -458.8 | -3.87 |
| 1130 | 81381 | -462.3 | -4.45 |
| 1131 | 81453 | -458.9 | -3.89 |
| 1132 | 81523 | -455.5 | -3.33 |
| 1133 | 81592 | -458.3 | -3.79 |
| 1134 | 81662 | -458.3 | -3.79 |
| 1135 | 81732 | -458.4 | -3.81 |
| 1136 | 81802 | -458   | -3.74 |
| 1137 | 81872 | -457.9 | -3.73 |
| 1138 | 81942 | -458.5 | -3.83 |
| 1139 | 82012 | -456.4 | -3.48 |
| 1140 | 82080 | -456.9 | -3.56 |
| 1141 | 82148 | -453.6 | -3.01 |
| 1142 | 82213 | -450.7 | -2.54 |
| 1143 | 82280 | -457.4 | -3.65 |
| 1144 | 82352 | -464.6 | -4.85 |
| 1145 | 82427 | -463   | -4.59 |
| 1146 | 82500 | -461.3 | -4.31 |
| 1147 | 82573 | -462.6 | -4.53 |
| 1148 | 82647 | -463.9 | -4.75 |
| 1149 | 82721 | -461   | -4.27 |
| 1150 | 82792 | -458   | -3.78 |
| 1151 | 82860 | -453.9 | -3.10 |
| 1152 | 82925 | -449.8 | -2.42 |
| 1153 | 82990 | -453.1 | -2.98 |

deutnat

|      |       |        |       |
|------|-------|--------|-------|
| 1154 | 83055 | -450.7 | -2.58 |
| 1155 | 83121 | -456   | -3.46 |
| 1156 | 83190 | -458.7 | -3.92 |
| 1157 | 83261 | -458.8 | -3.94 |
| 1158 | 83331 | -458.8 | -3.94 |
| 1159 | 83401 | -457.3 | -3.70 |
| 1160 | 83470 | -456.8 | -3.62 |
| 1161 | 83538 | -454.7 | -3.27 |
| 1162 | 83608 | -461.4 | -4.39 |
| 1163 | 83679 | -457.3 | -3.71 |
| 1164 | 83747 | -454.4 | -3.23 |
| 1165 | 83814 | -454.2 | -3.20 |
| 1166 | 83881 | -456.2 | -3.54 |
| 1167 | 83952 | -460.9 | -4.32 |
| 1168 | 84025 | -462.8 | -4.64 |
| 1169 | 84097 | -460.5 | -4.27 |
| 1170 | 84168 | -458.3 | -3.91 |
| 1171 | 84238 | -458.3 | -3.91 |
| 1172 | 84308 | -458.3 | -3.92 |
| 1173 | 84378 | -458.8 | -4.01 |
| 1174 | 84448 | -457.3 | -3.76 |
| 1175 | 84515 | -449.8 | -2.53 |
| 1176 | 84576 | -444.4 | -1.64 |
| 1177 | 84638 | -450.5 | -2.65 |
| 1178 | 84703 | -452.7 | -3.03 |
| 1179 | 84770 | -455.1 | -3.43 |
| 1180 | 84838 | -455.4 | -3.49 |
| 1181 | 84905 | -454.2 | -3.29 |
| 1182 | 84971 | -451.9 | -2.92 |
| 1183 | 85036 | -450.2 | -2.64 |
| 1184 | 85100 | -449.2 | -2.48 |
| 1185 | 85164 | -451.8 | -2.92 |
| 1186 | 85229 | -453   | -3.12 |
| 1187 | 85296 | -453.6 | -3.23 |
| 1188 | 85361 | -450.3 | -2.69 |
| 1189 | 85425 | -450   | -2.64 |
| 1190 | 85489 | -448.9 | -2.47 |
| 1191 | 85551 | -448.1 | -2.34 |
| 1192 | 85615 | -450.3 | -2.71 |
| 1193 | 85680 | -452   | -3.00 |
| 1194 | 85746 | -455.2 | -3.53 |
| 1195 | 85814 | -454.5 | -3.42 |
| 1196 | 85881 | -455.1 | -3.53 |
| 1197 | 85949 | -455   | -3.51 |
| 1198 | 86016 | -454.2 | -3.38 |
| 1199 | 86083 | -454.2 | -3.38 |
| 1200 | 86150 | -454.2 | -3.38 |
| 1201 | 86218 | -455.7 | -3.63 |
| 1202 | 86286 | -456.5 | -3.76 |
| 1203 | 86355 | -455.8 | -3.64 |
| 1204 | 86423 | -456.6 | -3.78 |
| 1205 | 86492 | -457.4 | -3.91 |
| 1206 | 86562 | -460   | -4.34 |
| 1207 | 86635 | -463.2 | -4.87 |
| 1208 | 86707 | -457.9 | -3.99 |

deutnat

|      |       |        |       |
|------|-------|--------|-------|
| 1209 | 86777 | -460.1 | -4.35 |
| 1210 | 86848 | -458.8 | -4.14 |
| 1211 | 86919 | -458.7 | -4.12 |
| 1212 | 86989 | -459   | -4.17 |
| 1213 | 87060 | -460.4 | -4.40 |
| 1214 | 87132 | -460.9 | -4.49 |
| 1215 | 87203 | -460.3 | -4.39 |
| 1216 | 87274 | -457.1 | -3.86 |
| 1217 | 87342 | -454.7 | -3.46 |
| 1218 | 87410 | -458.9 | -4.15 |
| 1219 | 87482 | -463   | -4.83 |
| 1220 | 87554 | -460.1 | -4.35 |
| 1221 | 87624 | -456.8 | -3.80 |
| 1222 | 87695 | -461.3 | -4.55 |
| 1223 | 87766 | -459.7 | -4.28 |
| 1224 | 87837 | -458.8 | -4.13 |
| 1225 | 87907 | -459.3 | -4.21 |
| 1226 | 87978 | -460.7 | -4.43 |
| 1227 | 88049 | -460.7 | -4.43 |
| 1228 | 88122 | -462.9 | -4.79 |
| 1229 | 88196 | -465   | -5.13 |
| 1230 | 88271 | -465   | -5.12 |
| 1231 | 88345 | -465   | -5.12 |
| 1232 | 88420 | -465   | -5.11 |
| 1233 | 88495 | -465   | -5.10 |
| 1234 | 88570 | -464.8 | -5.07 |
| 1235 | 88644 | -464.6 | -5.03 |
| 1236 | 88719 | -464.9 | -5.07 |
| 1237 | 88793 | -464.1 | -4.93 |
| 1238 | 88866 | -463.7 | -4.86 |
| 1239 | 88938 | -459.1 | -4.09 |
| 1240 | 89008 | -459.2 | -4.10 |
| 1241 | 89077 | -459.3 | -4.11 |
| 1242 | 89148 | -462.6 | -4.65 |
| 1243 | 89221 | -464.2 | -4.91 |
| 1244 | 89296 | -466.8 | -5.34 |
| 1245 | 89373 | -469.4 | -5.76 |
| 1246 | 89450 | -466.2 | -5.23 |
| 1247 | 89523 | -463   | -4.69 |
| 1248 | 89597 | -465.5 | -5.10 |
| 1249 | 89672 | -467.5 | -5.43 |
| 1250 | 89748 | -467.5 | -5.42 |
| 1251 | 89825 | -467.5 | -5.41 |
| 1252 | 89900 | -465.4 | -5.06 |
| 1253 | 89973 | -463.2 | -4.69 |
| 1254 | 90048 | -468.8 | -5.61 |
| 1255 | 90128 | -475.3 | -6.68 |
| 1256 | 90209 | -470.9 | -5.94 |
| 1257 | 90286 | -467.3 | -5.34 |
| 1258 | 90362 | -468.8 | -5.58 |
| 1259 | 90440 | -469.7 | -5.73 |
| 1260 | 90517 | -470   | -5.77 |
| 1261 | 90594 | -466.5 | -5.18 |
| 1262 | 90668 | -466.1 | -5.11 |
| 1263 | 90740 | -460.4 | -4.16 |

deutnat

|      |       |        |       |
|------|-------|--------|-------|
| 1264 | 90812 | -465.5 | -5.00 |
| 1265 | 90885 | -464.3 | -4.79 |
| 1266 | 90959 | -465.7 | -5.02 |
| 1267 | 91033 | -465.6 | -4.99 |
| 1268 | 91107 | -466.8 | -5.19 |
| 1269 | 91182 | -467   | -5.21 |
| 1270 | 91258 | -470.1 | -5.72 |
| 1271 | 91336 | -470.7 | -5.81 |
| 1272 | 91411 | -464.2 | -4.73 |
| 1273 | 91480 | -457   | -3.53 |
| 1274 | 91547 | -457.5 | -3.61 |
| 1275 | 91615 | -460.2 | -4.05 |
| 1276 | 91685 | -460.7 | -4.12 |
| 1277 | 91753 | -459.1 | -3.85 |
| 1278 | 91823 | -463.7 | -4.61 |
| 1279 | 91896 | -465.2 | -4.85 |
| 1280 | 91968 | -463.6 | -4.59 |
| 1281 | 92040 | -465.1 | -4.83 |
| 1282 | 92114 | -466.7 | -5.10 |
| 1283 | 92187 | -464.4 | -4.71 |
| 1284 | 92259 | -463.4 | -4.54 |
| 1285 | 92329 | -460.1 | -3.99 |
| 1286 | 92398 | -460.9 | -4.12 |
| 1287 | 92470 | -465.8 | -4.94 |
| 1288 | 92542 | -464.8 | -4.77 |
| 1289 | 92617 | -468.9 | -5.45 |
| 1290 | 92690 | -463.7 | -4.58 |
| 1291 | 92759 | -456.1 | -3.32 |
| 1292 | 92827 | -461.9 | -4.28 |
| 1293 | 92897 | -463   | -4.46 |
| 1294 | 92967 | -460.6 | -4.06 |
| 1295 | 93037 | -461.1 | -4.14 |
| 1296 | 93107 | -464   | -4.62 |
| 1297 | 93180 | -467.2 | -5.15 |
| 1298 | 93254 | -464.5 | -4.70 |
| 1299 | 93325 | -463.2 | -4.48 |
| 1300 | 93397 | -464.5 | -4.69 |
| 1301 | 93468 | -463   | -4.44 |
| 1302 | 93540 | -465.9 | -4.92 |
| 1303 | 93615 | -470.1 | -5.61 |
| 1304 | 93690 | -464.5 | -4.68 |
| 1305 | 93761 | -462   | -4.27 |
| 1306 | 93829 | -457.1 | -3.45 |
| 1307 | 93895 | -456   | -3.27 |
| 1308 | 93961 | -457.1 | -3.45 |
| 1309 | 94026 | -455.9 | -3.25 |
| 1310 | 94093 | -459.7 | -3.88 |
| 1311 | 94164 | -466.3 | -4.97 |
| 1312 | 94238 | -466.3 | -4.97 |
| 1313 | 94311 | -465.5 | -4.84 |
| 1314 | 94382 | -461.2 | -4.12 |
| 1315 | 94450 | -458.4 | -3.66 |
| 1316 | 94517 | -457.5 | -3.51 |
| 1317 | 94585 | -461.4 | -4.15 |
| 1318 | 94655 | -462.6 | -4.35 |

## deutnat

|      |       |        |       |
|------|-------|--------|-------|
| 1319 | 94725 | -463.2 | -4.45 |
| 1320 | 94795 | -460.8 | -4.05 |
| 1321 | 94864 | -459.7 | -3.87 |
| 1322 | 94932 | -459.3 | -3.80 |
| 1323 | 95000 | -460.3 | -3.96 |
| 1324 | 95070 | -462.9 | -4.39 |
| 1325 | 95141 | -465.2 | -4.77 |
| 1326 | 95214 | -466   | -4.90 |
| 1327 | 95284 | -458.4 | -3.64 |
| 1328 | 95351 | -456.9 | -3.39 |
| 1329 | 95418 | -459.9 | -3.89 |
| 1330 | 95487 | -460.6 | -4.00 |
| 1331 | 95556 | -460.6 | -4.00 |
| 1332 | 95624 | -460.6 | -4.00 |
| 1333 | 95693 | -459.7 | -3.85 |
| 1334 | 95761 | -458.8 | -3.70 |
| 1335 | 95828 | -458.8 | -3.70 |
| 1336 | 95895 | -458.8 | -3.70 |
| 1337 | 95964 | -460.6 | -4.00 |
| 1338 | 96033 | -462.4 | -4.30 |
| 1339 | 96103 | -460.3 | -3.95 |
| 1340 | 96170 | -457.6 | -3.50 |
| 1341 | 96237 | -457.6 | -3.50 |
| 1342 | 96304 | -459.4 | -3.80 |
| 1343 | 96372 | -459.8 | -3.87 |
| 1344 | 96441 | -462   | -4.23 |
| 1345 | 96511 | -462.7 | -4.35 |
| 1346 | 96582 | -462.3 | -4.28 |
| 1347 | 96652 | -462.7 | -4.35 |
| 1348 | 96722 | -459.9 | -3.88 |
| 1349 | 96791 | -461.8 | -4.20 |
| 1350 | 96861 | -463.7 | -4.51 |
| 1351 | 96933 | -463.7 | -4.51 |
| 1352 | 97004 | -463.7 | -4.51 |
| 1353 | 97075 | -463.1 | -4.42 |
| 1354 | 97148 | -468.1 | -5.24 |
| 1355 | 97222 | -466   | -4.90 |
| 1356 | 97294 | -462.7 | -4.35 |
| 1357 | 97365 | -464   | -4.57 |
| 1358 | 97439 | -469.4 | -5.46 |
| 1359 | 97514 | -466.5 | -4.98 |
| 1360 | 97588 | -465.9 | -4.88 |
| 1361 | 97659 | -461.3 | -4.12 |
| 1362 | 97727 | -456.7 | -3.36 |
| 1363 | 97794 | -461.2 | -4.10 |
| 1364 | 97864 | -462   | -4.24 |
| 1365 | 97936 | -465.5 | -4.82 |
| 1366 | 98010 | -468.9 | -5.38 |
| 1367 | 98085 | -465.8 | -4.87 |
| 1368 | 98157 | -462.8 | -4.38 |
| 1369 | 98228 | -463.6 | -4.51 |
| 1370 | 98300 | -465.6 | -4.84 |
| 1371 | 98371 | -460.1 | -3.93 |
| 1372 | 98439 | -457.5 | -3.50 |
| 1373 | 98505 | -457.5 | -3.51 |



deutnat

|      |        |        |       |
|------|--------|--------|-------|
| 1374 | 98572  | -457.5 | -3.51 |
| 1375 | 98640  | -461.2 | -4.12 |
| 1376 | 98712  | -465   | -4.75 |
| 1377 | 98783  | -462.8 | -4.39 |
| 1378 | 98855  | -463.8 | -4.56 |
| 1379 | 98925  | -460.4 | -4.00 |
| 1380 | 98994  | -459.2 | -3.80 |
| 1381 | 99063  | -461.4 | -4.17 |
| 1382 | 99134  | -463.9 | -4.58 |
| 1383 | 99205  | -462.5 | -4.35 |
| 1384 | 99275  | -461.1 | -4.12 |
| 1385 | 99345  | -460.8 | -4.07 |
| 1386 | 99414  | -460.5 | -4.03 |
| 1387 | 99484  | -460.4 | -4.01 |
| 1388 | 99553  | -460   | -3.95 |
| 1389 | 99622  | -459.8 | -3.92 |
| 1390 | 99691  | -460.8 | -4.08 |
| 1391 | 99760  | -459.6 | -3.89 |
| 1392 | 99828  | -457.2 | -3.49 |
| 1393 | 99894  | -457.2 | -3.49 |
| 1394 | 99961  | -457.2 | -3.49 |
| 1395 | 100028 | -456.9 | -3.45 |
| 1396 | 100095 | -458.1 | -3.65 |
| 1397 | 100163 | -459.2 | -3.83 |
| 1398 | 100232 | -460.7 | -4.08 |
| 1399 | 100301 | -457.7 | -3.59 |
| 1400 | 100367 | -454.8 | -3.11 |
| 1401 | 100432 | -454.8 | -3.11 |
| 1402 | 100498 | -456.5 | -3.39 |
| 1403 | 100565 | -458.2 | -3.68 |
| 1404 | 100633 | -458.2 | -3.68 |
| 1405 | 100700 | -457.8 | -3.61 |
| 1406 | 100768 | -457.3 | -3.53 |
| 1407 | 100835 | -456.6 | -3.42 |
| 1408 | 100902 | -457.9 | -3.64 |
| 1409 | 100969 | -457.2 | -3.52 |
| 1410 | 101036 | -456.5 | -3.41 |
| 1411 | 101102 | -455.8 | -3.29 |
| 1412 | 101168 | -455.1 | -3.18 |
| 1413 | 101234 | -455.1 | -3.18 |
| 1414 | 101299 | -453.9 | -2.99 |
| 1415 | 101363 | -452.6 | -2.77 |
| 1416 | 101427 | -452   | -2.67 |
| 1417 | 101490 | -451.4 | -2.58 |
| 1418 | 101554 | -453.7 | -2.96 |
| 1419 | 101618 | -452.8 | -2.81 |
| 1420 | 101681 | -449.5 | -2.27 |
| 1421 | 101743 | -450.1 | -2.37 |
| 1422 | 101806 | -450.8 | -2.49 |
| 1423 | 101868 | -450   | -2.36 |
| 1424 | 101930 | -449.2 | -2.23 |
| 1425 | 101991 | -448.4 | -2.10 |
| 1426 | 102052 | -447.6 | -1.97 |
| 1427 | 102114 | -450.3 | -2.42 |
| 1428 | 102177 | -452.9 | -2.86 |

deutnat

|      |        |        |       |
|------|--------|--------|-------|
| 1429 | 102241 | -451.5 | -2.63 |
| 1430 | 102304 | -450.2 | -2.42 |
| 1431 | 102366 | -449.2 | -2.26 |
| 1432 | 102427 | -448.3 | -2.11 |
| 1433 | 102489 | -450.5 | -2.48 |
| 1434 | 102553 | -452.7 | -2.85 |
| 1435 | 102618 | -454.1 | -3.08 |
| 1436 | 102684 | -455.5 | -3.32 |
| 1437 | 102749 | -452.5 | -2.82 |
| 1438 | 102812 | -449.5 | -2.33 |
| 1439 | 102876 | -453.1 | -2.93 |
| 1440 | 102942 | -456.8 | -3.55 |
| 1441 | 103008 | -454   | -3.09 |
| 1442 | 103073 | -451.1 | -2.61 |
| 1443 | 103137 | -454.6 | -3.19 |
| 1444 | 103205 | -458.1 | -3.78 |
| 1445 | 103273 | -457.4 | -3.67 |
| 1446 | 103341 | -456.7 | -3.55 |
| 1447 | 103410 | -459.6 | -4.04 |
| 1448 | 103481 | -462.5 | -4.52 |
| 1449 | 103553 | -462.1 | -4.46 |
| 1450 | 103625 | -461.8 | -4.41 |
| 1451 | 103697 | -461.8 | -4.41 |
| 1452 | 103769 | -462.3 | -4.50 |
| 1453 | 103841 | -462   | -4.45 |
| 1454 | 103912 | -461.1 | -4.30 |
| 1455 | 103984 | -460.7 | -4.24 |
| 1456 | 104054 | -460.2 | -4.16 |
| 1457 | 104125 | -459.9 | -4.11 |
| 1458 | 104195 | -459.5 | -4.05 |
| 1459 | 104266 | -460.5 | -4.22 |
| 1460 | 104337 | -461.6 | -4.40 |
| 1461 | 104409 | -461.4 | -4.37 |
| 1462 | 104480 | -461.1 | -4.32 |
| 1463 | 104552 | -461.1 | -4.33 |
| 1464 | 104623 | -461.1 | -4.33 |
| 1465 | 104695 | -460.6 | -4.25 |
| 1466 | 104766 | -460.1 | -4.17 |
| 1467 | 104837 | -460.1 | -4.17 |
| 1468 | 104908 | -462.2 | -4.52 |
| 1469 | 104982 | -464.2 | -4.85 |
| 1470 | 105055 | -463   | -4.66 |
| 1471 | 105128 | -461.9 | -4.48 |
| 1472 | 105200 | -460.7 | -4.28 |
| 1473 | 105271 | -459.6 | -4.10 |
| 1474 | 105342 | -460.2 | -4.20 |
| 1475 | 105413 | -460.7 | -4.29 |
| 1476 | 105485 | -462   | -4.51 |
| 1477 | 105559 | -463.2 | -4.71 |
| 1478 | 105631 | -460.9 | -4.33 |
| 1479 | 105702 | -458.5 | -3.93 |
| 1480 | 105772 | -458.5 | -3.93 |
| 1481 | 105842 | -458.5 | -3.92 |
| 1482 | 105911 | -457.9 | -3.82 |
| 1483 | 105980 | -457.2 | -3.71 |

## deutnat

|      |        |        |       |
|------|--------|--------|-------|
| 1484 | 106048 | -454.2 | -3.21 |
| 1485 | 106114 | -451.2 | -2.71 |
| 1486 | 106179 | -455.2 | -3.37 |
| 1487 | 106248 | -459.1 | -4.02 |
| 1488 | 106319 | -460.5 | -4.25 |
| 1489 | 106391 | -461.9 | -4.48 |
| 1490 | 106463 | -460.6 | -4.26 |
| 1491 | 106535 | -459.3 | -4.04 |
| 1492 | 106606 | -461   | -4.32 |
| 1493 | 106678 | -462.7 | -4.60 |
| 1494 | 106752 | -464.1 | -4.84 |
| 1495 | 106828 | -465.5 | -5.07 |
| 1496 | 106902 | -463.5 | -4.73 |
| 1497 | 106976 | -461.5 | -4.40 |
| 1498 | 107048 | -461.5 | -4.40 |
| 1499 | 107121 | -461.5 | -4.40 |
| 1500 | 107194 | -464.4 | -4.88 |
| 1501 | 107270 | -467.3 | -5.36 |
| 1502 | 107349 | -470.7 | -5.92 |
| 1503 | 107431 | -474.1 | -6.48 |
| 1504 | 107515 | -474.1 | -6.48 |
| 1505 | 107599 | -474.1 | -6.48 |
| 1506 | 107683 | -474.1 | -6.48 |
| 1507 | 107767 | -475.3 | -6.67 |
| 1508 | 107852 | -476.4 | -6.85 |
| 1509 | 107938 | -476.7 | -6.90 |
| 1510 | 108025 | -477   | -6.95 |
| 1511 | 108111 | -477   | -6.95 |
| 1512 | 108198 | -476.3 | -6.83 |
| 1513 | 108283 | -475.6 | -6.71 |
| 1514 | 108369 | -475.6 | -6.71 |
| 1515 | 108454 | -475.2 | -6.64 |
| 1516 | 108538 | -474.8 | -6.57 |
| 1517 | 108622 | -474   | -6.43 |
| 1518 | 108706 | -473.1 | -6.28 |
| 1519 | 108789 | -473.1 | -6.28 |
| 1520 | 108872 | -473.1 | -6.28 |
| 1521 | 108954 | -473.1 | -6.27 |
| 1522 | 109037 | -473.1 | -6.27 |
| 1523 | 109121 | -474.7 | -6.53 |
| 1524 | 109206 | -476.4 | -6.81 |
| 1525 | 109292 | -476.4 | -6.81 |
| 1526 | 109378 | -474.2 | -6.44 |
| 1527 | 109461 | -472.1 | -6.09 |
| 1528 | 109543 | -472.1 | -6.09 |
| 1529 | 109625 | -472.1 | -6.09 |
| 1530 | 109707 | -472.8 | -6.20 |
| 1531 | 109790 | -473.4 | -6.30 |
| 1532 | 109872 | -470.9 | -5.88 |
| 1533 | 109952 | -468.4 | -5.47 |
| 1534 | 110031 | -468.8 | -5.53 |
| 1535 | 110110 | -469.1 | -5.58 |
| 1536 | 110189 | -469.1 | -5.58 |
| 1537 | 110269 | -469.1 | -5.58 |
| 1538 | 110348 | -469.1 | -5.58 |

deutnat

|      |        |        |       |
|------|--------|--------|-------|
| 1539 | 110427 | -469.1 | -5.57 |
| 1540 | 110507 | -469.1 | -5.57 |
| 1541 | 110586 | -469.1 | -5.57 |
| 1542 | 110666 | -469.1 | -5.57 |
| 1543 | 110746 | -471.7 | -6.00 |
| 1544 | 110829 | -474.2 | -6.42 |
| 1545 | 110913 | -473.2 | -6.25 |
| 1546 | 110996 | -472.2 | -6.08 |
| 1547 | 111078 | -471   | -5.88 |
| 1548 | 111159 | -469.8 | -5.68 |
| 1549 | 111239 | -469.8 | -5.68 |
| 1550 | 111319 | -469.8 | -5.68 |
| 1551 | 111399 | -469.8 | -5.68 |
| 1552 | 111480 | -469.8 | -5.68 |
| 1553 | 111560 | -469.8 | -5.68 |
| 1554 | 111640 | -469.8 | -5.68 |
| 1555 | 111721 | -471.9 | -6.02 |
| 1556 | 111805 | -474   | -6.37 |
| 1557 | 111889 | -474   | -6.37 |
| 1558 | 111973 | -472.7 | -6.16 |
| 1559 | 112055 | -471.4 | -5.94 |
| 1560 | 112137 | -471.4 | -5.94 |
| 1561 | 112219 | -471.4 | -5.94 |
| 1562 | 112301 | -471.4 | -5.94 |
| 1563 | 112383 | -471.4 | -5.94 |
| 1564 | 112465 | -471.4 | -5.93 |
| 1565 | 112547 | -470.7 | -5.82 |
| 1566 | 112628 | -470   | -5.70 |
| 1567 | 112708 | -469.8 | -5.67 |
| 1568 | 112790 | -471   | -5.86 |
| 1569 | 112872 | -472.2 | -6.06 |
| 1570 | 112954 | -471.4 | -5.93 |
| 1571 | 113036 | -470.6 | -5.80 |
| 1572 | 113116 | -468.2 | -5.40 |
| 1573 | 113195 | -465.7 | -4.98 |
| 1574 | 113272 | -465.7 | -4.98 |
| 1575 | 113348 | -465   | -4.86 |
| 1576 | 113425 | -464.9 | -4.85 |
| 1577 | 113501 | -465.2 | -4.89 |
| 1578 | 113578 | -465.5 | -4.94 |
| 1579 | 113656 | -467.5 | -5.27 |
| 1580 | 113736 | -469.6 | -5.62 |
| 1581 | 113815 | -466.5 | -5.10 |
| 1582 | 113891 | -463.3 | -4.57 |
| 1583 | 113966 | -463.3 | -4.57 |
| 1584 | 114041 | -462.6 | -4.45 |
| 1585 | 114115 | -461.9 | -4.33 |
| 1586 | 114189 | -462.1 | -4.36 |
| 1587 | 114264 | -462.3 | -4.39 |
| 1588 | 114338 | -461.8 | -4.31 |
| 1589 | 114411 | -461.4 | -4.24 |
| 1590 | 114486 | -463.5 | -4.59 |
| 1591 | 114562 | -465.7 | -4.95 |
| 1592 | 114639 | -464.7 | -4.78 |
| 1593 | 114715 | -463.6 | -4.60 |

|      |        |        |       |
|------|--------|--------|-------|
| 1594 | 114790 | -462   | -4.33 |
| 1595 | 114863 | -460.4 | -4.06 |
| 1596 | 114935 | -458.5 | -3.75 |
| 1597 | 115006 | -456.7 | -3.45 |
| 1598 | 115077 | -459.4 | -3.89 |
| 1599 | 115150 | -462   | -4.32 |
| 1600 | 115222 | -456.5 | -3.41 |
| 1601 | 115289 | -450.9 | -2.48 |
| 1602 | 115355 | -450.9 | -2.47 |
| 1603 | 115420 | -450.9 | -2.47 |
| 1604 | 115486 | -450.9 | -2.47 |
| 1605 | 115551 | -450.9 | -2.47 |
| 1606 | 115617 | -450.9 | -2.47 |
| 1607 | 115683 | -451.5 | -2.56 |
| 1608 | 115749 | -452   | -2.64 |
| 1609 | 115816 | -454.8 | -3.11 |
| 1610 | 115886 | -457.6 | -3.57 |
| 1611 | 115956 | -456.2 | -3.34 |
| 1612 | 116025 | -454.7 | -3.08 |
| 1613 | 116093 | -454   | -2.97 |
| 1614 | 116161 | -453.4 | -2.86 |
| 1615 | 116228 | -453.5 | -2.88 |
| 1616 | 116296 | -453.2 | -2.83 |
| 1617 | 116363 | -452.8 | -2.76 |
| 1618 | 116430 | -452.5 | -2.71 |
| 1619 | 116497 | -452.3 | -2.67 |
| 1620 | 116563 | -452.3 | -2.67 |
| 1621 | 116630 | -452.3 | -2.67 |
| 1622 | 116697 | -451.5 | -2.53 |
| 1623 | 116762 | -450.8 | -2.41 |
| 1624 | 116827 | -449   | -2.11 |
| 1625 | 116891 | -447.3 | -1.83 |
| 1626 | 116954 | -446.1 | -1.62 |
| 1627 | 117016 | -445   | -1.44 |
| 1628 | 117077 | -445   | -1.44 |
| 1629 | 117139 | -446.2 | -1.63 |
| 1630 | 117202 | -447.4 | -1.83 |
| 1631 | 117264 | -446   | -1.59 |
| 1632 | 117326 | -444.6 | -1.36 |
| 1633 | 117388 | -446.5 | -1.67 |
| 1634 | 117451 | -448.5 | -2.00 |
| 1635 | 117514 | -445.5 | -1.50 |
| 1636 | 117575 | -442.4 | -0.98 |
| 1637 | 117635 | -444.1 | -1.26 |
| 1638 | 117697 | -445.8 | -1.54 |
| 1639 | 117759 | -446.6 | -1.67 |
| 1640 | 117822 | -447.7 | -1.85 |
| 1641 | 117886 | -447.9 | -1.88 |
| 1642 | 117949 | -447.3 | -1.78 |
| 1643 | 118012 | -446.6 | -1.66 |
| 1644 | 118074 | -444.5 | -1.31 |
| 1645 | 118135 | -442.3 | -0.94 |
| 1646 | 118194 | -442.3 | -0.93 |
| 1647 | 118254 | -442.3 | -0.93 |
| 1648 | 118314 | -443.9 | -1.19 |

deutnat

|      |        |        |       |
|------|--------|--------|-------|
| 1649 | 118376 | -445.5 | -1.46 |
| 1650 | 118438 | -445.5 | -1.45 |
| 1651 | 118499 | -443.5 | -1.12 |
| 1652 | 118559 | -441.6 | -0.80 |
| 1653 | 118618 | -440.2 | -0.57 |
| 1654 | 118676 | -438.7 | -0.31 |
| 1655 | 118735 | -443.1 | -1.04 |
| 1656 | 118796 | -447.5 | -1.77 |
| 1657 | 118859 | -445.7 | -1.47 |
| 1658 | 118921 | -443.9 | -1.16 |
| 1659 | 118981 | -443.9 | -1.16 |
| 1660 | 119042 | -442   | -0.84 |
| 1661 | 119101 | -440   | -0.51 |
| 1662 | 119160 | -442.7 | -0.95 |
| 1663 | 119221 | -445.4 | -1.40 |
| 1664 | 119283 | -445.4 | -1.40 |
| 1665 | 119345 | -445   | -1.33 |
| 1666 | 119406 | -444.7 | -1.27 |
| 1667 | 119467 | -443.5 | -1.07 |
| 1668 | 119528 | -443.6 | -1.09 |
| 1669 | 119589 | -445   | -1.31 |
| 1670 | 119650 | -443.1 | -1.00 |
| 1671 | 119710 | -441.2 | -0.68 |
| 1672 | 119770 | -443.6 | -1.07 |
| 1673 | 119831 | -446   | -1.47 |
| 1674 | 119894 | -446   | -1.47 |
| 1675 | 119955 | -444.2 | -1.16 |
| 1676 | 120016 | -442.4 | -0.86 |
| 1677 | 120076 | -443.7 | -1.08 |
| 1678 | 120138 | -445   | -1.29 |
| 1679 | 120199 | -443.8 | -1.09 |
| 1680 | 120259 | -442.5 | -0.87 |
| 1681 | 120319 | -442.5 | -0.86 |
| 1682 | 120379 | -442.5 | -0.86 |
| 1683 | 120439 | -441.1 | -0.63 |
| 1684 | 120498 | -439.8 | -0.41 |
| 1685 | 120555 | -438.2 | -0.14 |
| 1686 | 120612 | -436.6 | 0.13  |
| 1687 | 120669 | -437.3 | 0.02  |
| 1688 | 120726 | -438   | -0.10 |
| 1689 | 120783 | -438.9 | -0.24 |
| 1690 | 120841 | -440.4 | -0.49 |
| 1691 | 120900 | -441   | -0.59 |
| 1692 | 120959 | -441   | -0.58 |
| 1693 | 121018 | -442   | -0.75 |
| 1694 | 121079 | -443.1 | -0.93 |
| 1695 | 121139 | -443.1 | -0.92 |
| 1696 | 121199 | -440.4 | -0.47 |
| 1697 | 121256 | -437.6 | 0.00  |
| 1698 | 121314 | -439.5 | -0.32 |
| 1699 | 121373 | -441.5 | -0.65 |
| 1700 | 121432 | -441.5 | -0.64 |
| 1701 | 121492 | -441.4 | -0.62 |
| 1702 | 121551 | -441.3 | -0.60 |
| 1703 | 121610 | -441.3 | -0.60 |

deutnat

|      |        |        |       |
|------|--------|--------|-------|
| 1704 | 121669 | -439.6 | -0.32 |
| 1705 | 121727 | -437.9 | -0.03 |
| 1706 | 121784 | -437.9 | -0.03 |
| 1707 | 121840 | -436.1 | 0.28  |
| 1708 | 121896 | -434.3 | 0.58  |
| 1709 | 121951 | -434.3 | 0.59  |
| 1710 | 122006 | -437.2 | 0.11  |
| 1711 | 122064 | -440.1 | -0.37 |
| 1712 | 122122 | -438   | -0.01 |
| 1713 | 122178 | -436   | 0.32  |
| 1714 | 122234 | -435.5 | 0.41  |
| 1715 | 122290 | -435   | 0.50  |
| 1716 | 122345 | -436.1 | 0.32  |
| 1717 | 122402 | -437.3 | 0.13  |
| 1718 | 122458 | -437.3 | 0.13  |
| 1719 | 122515 | -436.5 | 0.27  |
| 1720 | 122571 | -435.8 | 0.39  |
| 1721 | 122627 | -437.1 | 0.18  |
| 1722 | 122684 | -438.5 | -0.05 |
| 1723 | 122742 | -440.6 | -0.39 |
| 1724 | 122801 | -442.8 | -0.75 |
| 1725 | 122861 | -440.1 | -0.30 |
| 1726 | 122919 | -438.9 | -0.09 |
| 1727 | 122977 | -440.3 | -0.32 |
| 1728 | 123036 | -440.9 | -0.41 |
| 1729 | 123095 | -441.5 | -0.51 |
| 1730 | 123154 | -439.9 | -0.24 |
| 1731 | 123211 | -438.2 | 0.05  |
| 1732 | 123268 | -435.3 | 0.54  |
| 1733 | 123322 | -432.4 | 1.02  |
| 1734 | 123377 | -434.8 | 0.63  |
| 1735 | 123432 | -437.3 | 0.22  |
| 1736 | 123489 | -437   | 0.27  |
| 1737 | 123545 | -436.6 | 0.34  |
| 1738 | 123602 | -437.2 | 0.25  |
| 1739 | 123658 | -437.8 | 0.16  |
| 1740 | 123715 | -436.1 | 0.44  |
| 1741 | 123770 | -434.5 | 0.71  |
| 1742 | 123825 | -434.5 | 0.72  |
| 1743 | 123880 | -435.1 | 0.62  |
| 1744 | 123936 | -435.8 | 0.51  |
| 1745 | 123991 | -436.5 | 0.40  |
| 1746 | 124046 | -432.5 | 1.07  |
| 1747 | 124100 | -431.5 | 1.24  |
| 1748 | 124154 | -435.4 | 0.59  |
| 1749 | 124209 | -435.4 | 0.60  |
| 1750 | 124265 | -435.4 | 0.60  |
| 1751 | 124320 | -436   | 0.50  |
| 1752 | 124376 | -436.6 | 0.40  |
| 1753 | 124432 | -436   | 0.50  |
| 1754 | 124488 | -435.5 | 0.58  |
| 1755 | 124544 | -435.3 | 0.62  |
| 1756 | 124599 | -435.1 | 0.65  |
| 1757 | 124654 | -435.3 | 0.62  |
| 1758 | 124710 | -435.4 | 0.60  |

deutnat

|      |        |        |       |
|------|--------|--------|-------|
| 1759 | 124765 | -435.4 | 0.60  |
| 1760 | 124821 | -435.1 | 0.65  |
| 1761 | 124877 | -437.4 | 0.27  |
| 1762 | 124935 | -439.9 | -0.14 |
| 1763 | 124993 | -438.8 | 0.04  |
| 1764 | 125050 | -437.6 | 0.24  |
| 1765 | 125107 | -436.2 | 0.47  |
| 1766 | 125162 | -434.9 | 0.69  |
| 1767 | 125217 | -433.3 | 0.95  |
| 1768 | 125271 | -431.7 | 1.22  |
| 1769 | 125325 | -433.5 | 0.92  |
| 1770 | 125380 | -435.4 | 0.61  |
| 1771 | 125435 | -434.1 | 0.82  |
| 1772 | 125490 | -432.9 | 1.02  |
| 1773 | 125544 | -432.6 | 1.07  |
| 1774 | 125598 | -432.4 | 1.11  |
| 1775 | 125653 | -434.5 | 0.76  |
| 1776 | 125708 | -436.5 | 0.43  |
| 1777 | 125765 | -436.4 | 0.45  |
| 1778 | 125821 | -435.9 | 0.53  |
| 1779 | 125877 | -435.4 | 0.61  |
| 1780 | 125933 | -435.8 | 0.55  |
| 1781 | 125989 | -436.3 | 0.47  |
| 1782 | 126046 | -436.8 | 0.38  |
| 1783 | 126103 | -437.4 | 0.28  |
| 1784 | 126160 | -438.1 | 0.17  |
| 1785 | 126217 | -435.9 | 0.53  |
| 1786 | 126272 | -432.9 | 1.03  |
| 1787 | 126327 | -433.1 | 1.00  |
| 1788 | 126381 | -433.3 | 0.97  |
| 1789 | 126436 | -433.5 | 0.93  |
| 1790 | 126491 | -433.7 | 0.90  |
| 1791 | 126545 | -431.5 | 1.26  |
| 1792 | 126598 | -429.3 | 1.61  |
| 1793 | 126650 | -427.3 | 1.93  |
| 1794 | 126700 | -423.8 | 2.50  |
| 1795 | 126749 | -422.3 | 2.74  |
| 1796 | 126799 | -426.3 | 2.07  |
| 1797 | 126851 | -430.2 | 1.41  |
| 1798 | 126904 | -428.2 | 1.73  |
| 1799 | 126955 | -426.1 | 2.07  |
| 1800 | 127006 | -426.1 | 2.06  |
| 1801 | 127057 | -426.1 | 2.05  |
| 1802 | 127108 | -426.1 | 2.04  |
| 1803 | 127159 | -425.5 | 2.13  |
| 1804 | 127210 | -424.9 | 2.22  |
| 1805 | 127260 | -424.2 | 2.33  |
| 1806 | 127310 | -423.5 | 2.44  |
| 1807 | 127360 | -423.4 | 2.44  |
| 1808 | 127410 | -423.2 | 2.46  |
| 1809 | 127460 | -423.7 | 2.37  |
| 1810 | 127510 | -424.1 | 2.29  |
| 1811 | 127560 | -423.3 | 2.40  |
| 1812 | 127610 | -422.5 | 2.52  |
| 1813 | 127660 | -423.3 | 2.37  |



deutnat

|      |        |        |       |
|------|--------|--------|-------|
| 1814 | 127710 | -424.1 | 2.22  |
| 1815 | 127760 | -422.7 | 2.43  |
| 1816 | 127810 | -421.7 | 2.58  |
| 1817 | 127860 | -422.1 | 2.49  |
| 1818 | 127910 | -424   | 2.16  |
| 1819 | 127961 | -424.5 | 2.06  |
| 1820 | 128012 | -423.2 | 2.26  |
| 1821 | 128062 | -421.7 | 2.49  |
| 1822 | 128112 | -420.2 | 2.72  |
| 1823 | 128161 | -420.2 | 2.70  |
| 1824 | 128210 | -420.2 | 2.68  |
| 1825 | 128259 | -421.2 | 2.50  |
| 1826 | 128309 | -419.4 | 2.78  |
| 1827 | 128357 | -416.6 | 3.23  |
| 1828 | 128405 | -416.9 | 3.16  |
| 1829 | 128453 | -417.2 | 3.08  |
| 1830 | 128501 | -417.2 | 3.06  |
| 1831 | 128549 | -419.1 | 2.71  |
| 1832 | 128599 | -421   | 2.37  |
| 1833 | 128650 | -422.4 | 2.11  |
| 1834 | 128702 | -423.7 | 1.87  |
| 1835 | 128753 | -421.8 | 2.16  |
| 1836 | 128804 | -419.9 | 2.45  |
| 1837 | 128854 | -421.2 | 2.20  |
| 1838 | 128906 | -422.5 | 1.96  |
| 1839 | 128958 | -423.9 | 1.70  |
| 1840 | 129011 | -425.3 | 1.44  |
| 1841 | 129065 | -425.3 | 1.42  |
| 1842 | 129119 | -425.3 | 1.39  |
| 1843 | 129172 | -422.5 | 1.83  |
| 1844 | 129224 | -419.8 | 2.25  |
| 1845 | 129274 | -418   | 2.52  |
| 1846 | 129324 | -416.3 | 2.78  |
| 1847 | 129374 | -419.6 | 2.20  |
| 1848 | 129428 | -428.7 | 0.67  |
| 1849 | 129486 | -434.5 | -0.31 |
| 1850 | 129545 | -429.1 | 0.56  |
| 1851 | 129600 | -423.8 | 1.42  |
| 1852 | 129653 | -421.5 | 1.78  |
| 1853 | 129705 | -419.1 | 2.16  |
| 1854 | 129757 | -420.2 | 1.95  |
| 1855 | 129809 | -421.4 | 1.73  |
| 1856 | 129863 | -422.1 | 1.60  |
| 1857 | 129916 | -423.7 | 1.31  |
| 1858 | 129971 | -424.6 | 1.14  |
| 1859 | 130026 | -422.5 | 1.47  |
| 1860 | 130079 | -420.3 | 1.81  |
| 1861 | 130131 | -420.3 | 1.79  |
| 1862 | 130185 | -423.5 | 1.24  |
| 1863 | 130241 | -426.7 | 0.68  |
| 1864 | 130297 | -425.4 | 0.88  |
| 1865 | 130353 | -425.5 | 0.84  |
| 1866 | 130410 | -426.9 | 0.59  |
| 1867 | 130467 | -427   | 0.57  |
| 1868 | 130525 | -427.2 | 0.53  |

|      |        |        |       |
|------|--------|--------|-------|
| 1869 | 130582 | -428   | 0.40  |
| 1870 | 130641 | -428.9 | 0.24  |
| 1871 | 130699 | -429.5 | 0.14  |
| 1872 | 130759 | -431.1 | -0.13 |
| 1873 | 130819 | -432.2 | -0.31 |
| 1874 | 130880 | -432.9 | -0.43 |
| 1875 | 130942 | -433.5 | -0.54 |
| 1876 | 131004 | -433.6 | -0.56 |
| 1877 | 131066 | -433.7 | -0.58 |
| 1878 | 131128 | -435   | -0.79 |
| 1879 | 131190 | -432.7 | -0.42 |
| 1880 | 131250 | -429.2 | 0.16  |
| 1881 | 131311 | -433.1 | -0.49 |
| 1882 | 131374 | -437   | -1.14 |
| 1883 | 131439 | -439.4 | -1.54 |
| 1884 | 131506 | -441.8 | -1.94 |
| 1885 | 131574 | -440.5 | -1.73 |
| 1886 | 131641 | -439.2 | -1.51 |
| 1887 | 131707 | -439   | -1.48 |
| 1888 | 131773 | -438.8 | -1.45 |
| 1889 | 131840 | -441.3 | -1.87 |
| 1890 | 131908 | -443.8 | -2.28 |
| 1891 | 131978 | -443.5 | -2.23 |
| 1892 | 132048 | -445   | -2.48 |
| 1893 | 132120 | -446.8 | -2.78 |
| 1894 | 132192 | -446.8 | -2.78 |
| 1895 | 132264 | -445.7 | -2.60 |
| 1896 | 132335 | -444.6 | -2.42 |
| 1897 | 132406 | -444.7 | -2.44 |
| 1898 | 132477 | -445.2 | -2.52 |
| 1899 | 132548 | -445.5 | -2.57 |
| 1900 | 132619 | -445.5 | -2.58 |
| 1901 | 132691 | -445.5 | -2.58 |
| 1902 | 132763 | -446.6 | -2.76 |
| 1903 | 132836 | -449   | -3.16 |
| 1904 | 132911 | -450.2 | -3.36 |
| 1905 | 132987 | -451.7 | -3.61 |
| 1906 | 133065 | -453.1 | -3.84 |
| 1907 | 133142 | -452.2 | -3.69 |
| 1908 | 133219 | -451.3 | -3.54 |
| 1909 | 133296 | -452.5 | -3.73 |
| 1910 | 133374 | -453.7 | -3.93 |
| 1911 | 133452 | -451.6 | -3.58 |
| 1912 | 133528 | -449.5 | -3.23 |
| 1913 | 133603 | -449.5 | -3.23 |
| 1914 | 133679 | -453   | -3.81 |
| 1915 | 133759 | -456.6 | -4.41 |
| 1916 | 133841 | -456.9 | -4.46 |
| 1917 | 133923 | -457   | -4.47 |
| 1918 | 134005 | -459.5 | -4.89 |
| 1919 | 134091 | -461.9 | -5.28 |
| 1920 | 134178 | -462.6 | -5.40 |
| 1921 | 134266 | -464.7 | -5.74 |
| 1922 | 134356 | -465.8 | -5.93 |
| 1923 | 134447 | -466.8 | -6.09 |

deutnat

|      |        |        |       |
|------|--------|--------|-------|
| 1924 | 134538 | -464.8 | -5.76 |
| 1925 | 134628 | -464.7 | -5.74 |
| 1926 | 134719 | -468.6 | -6.39 |
| 1927 | 134815 | -472.1 | -6.97 |
| 1928 | 134912 | -471.7 | -6.90 |
| 1929 | 135009 | -471.6 | -6.88 |
| 1930 | 135107 | -473.4 | -7.18 |
| 1931 | 135207 | -473.9 | -7.26 |
| 1932 | 135308 | -475.2 | -7.48 |
| 1933 | 135408 | -474.1 | -7.30 |
| 1934 | 135507 | -471.3 | -6.83 |
| 1935 | 135604 | -471.8 | -6.91 |
| 1936 | 135702 | -473.1 | -7.13 |
| 1937 | 135802 | -474.3 | -7.33 |
| 1938 | 135903 | -474.2 | -7.31 |
| 1939 | 136003 | -473.2 | -7.14 |
| 1940 | 136103 | -475.4 | -7.51 |
| 1941 | 136206 | -477.2 | -7.81 |
| 1942 | 136309 | -475   | -7.44 |
| 1943 | 136411 | -474.7 | -7.39 |
| 1944 | 136512 | -475.6 | -7.54 |
| 1945 | 136614 | -474.1 | -7.29 |
| 1946 | 136715 | -475.4 | -7.51 |
| 1947 | 136819 | -478   | -7.94 |
| 1948 | 136923 | -476.1 | -7.62 |
| 1949 | 137026 | -475.4 | -7.50 |
| 1950 | 137130 | -477.3 | -7.82 |
| 1951 | 137235 | -478   | -7.93 |
| 1952 | 137341 | -478.3 | -7.98 |
| 1953 | 137446 | -476.7 | -7.72 |
| 1954 | 137549 | -475.1 | -7.45 |
| 1955 | 137651 | -475.2 | -7.47 |
| 1956 | 137754 | -475.7 | -7.55 |
| 1957 | 137858 | -477.7 | -7.88 |
| 1958 | 137966 | -481.5 | -8.51 |
| 1959 | 138078 | -483.8 | -8.89 |
| 1960 | 138193 | -485.9 | -9.24 |
| 1961 | 138308 | -484.1 | -8.94 |
| 1962 | 138420 | -482   | -8.59 |
| 1963 | 138532 | -482.8 | -8.72 |
| 1964 | 138644 | -482.5 | -8.67 |
| 1965 | 138756 | -482.5 | -8.67 |
| 1966 | 138868 | -482   | -8.59 |
| 1967 | 138978 | -480.3 | -8.30 |
| 1968 | 139087 | -480.3 | -8.30 |
| 1969 | 139197 | -481.7 | -8.53 |
| 1970 | 139308 | -480.9 | -8.40 |
| 1971 | 139418 | -480.9 | -8.40 |
| 1972 | 139530 | -482.7 | -8.70 |
| 1973 | 139643 | -483.7 | -8.86 |
| 1974 | 139756 | -482.5 | -8.66 |
| 1975 | 139868 | -481.1 | -8.43 |
| 1976 | 139979 | -482.4 | -8.64 |
| 1977 | 140093 | -484.5 | -8.99 |
| 1978 | 140207 | -483.5 | -8.82 |

deutnat

|      |        |        |       |
|------|--------|--------|-------|
| 1979 | 140319 | -480.6 | -8.34 |
| 1980 | 140430 | -481.2 | -8.44 |
| 1981 | 140542 | -482.6 | -8.67 |
| 1982 | 140655 | -482.2 | -8.60 |
| 1983 | 140766 | -480.9 | -8.38 |
| 1984 | 140876 | -479.3 | -8.11 |
| 1985 | 140986 | -482.2 | -8.59 |
| 1986 | 141100 | -483.2 | -8.75 |
| 1987 | 141212 | -481   | -8.38 |
| 1988 | 141323 | -480.6 | -8.31 |
| 1989 | 141434 | -482   | -8.54 |
| 1990 | 141547 | -483   | -8.70 |
| 1991 | 141661 | -482.3 | -8.58 |
| 1992 | 141773 | -481.9 | -8.51 |
| 1993 | 141885 | -481.2 | -8.39 |
| 1994 | 141997 | -482.1 | -8.54 |
| 1995 | 142108 | -480.1 | -8.21 |
| 1996 | 142218 | -479.6 | -8.12 |
| 1997 | 142329 | -481.1 | -8.36 |
| 1998 | 142440 | -480.4 | -8.25 |
| 1999 | 142551 | -481.9 | -8.49 |
| 2000 | 142665 | -483.4 | -8.73 |
| 2001 | 142779 | -483.1 | -8.68 |
| 2002 | 142893 | -482.5 | -8.58 |
| 2003 | 143006 | -481.5 | -8.41 |
| 2004 | 143117 | -479.6 | -8.09 |
| 2005 | 143227 | -480.1 | -8.17 |
| 2006 | 143338 | -481   | -8.31 |
| 2007 | 143450 | -481.2 | -8.34 |
| 2008 | 143562 | -481.2 | -8.34 |
| 2009 | 143675 | -483.1 | -8.65 |
| 2010 | 143790 | -484.5 | -8.87 |
| 2011 | 143905 | -481.4 | -8.36 |
| 2012 | 144016 | -479   | -7.95 |
| 2013 | 144126 | -480.4 | -8.18 |
| 2014 | 144237 | -480.1 | -8.13 |
| 2015 | 144346 | -477.6 | -7.71 |
| 2016 | 144453 | -478.1 | -7.79 |
| 2017 | 144562 | -478.5 | -7.85 |
| 2018 | 144671 | -479   | -7.93 |
| 2019 | 144782 | -480.7 | -8.21 |
| 2020 | 144894 | -481.4 | -8.32 |
| 2021 | 145006 | -480.6 | -8.19 |
| 2022 | 145116 | -478.9 | -7.90 |
| 2023 | 145226 | -479.5 | -8.00 |
| 2024 | 145337 | -480.3 | -8.13 |
| 2025 | 145449 | -481.4 | -8.31 |
| 2026 | 145563 | -483.3 | -8.62 |
| 2027 | 145678 | -482.5 | -8.49 |
| 2028 | 145792 | -481.6 | -8.34 |
| 2029 | 145905 | -482.3 | -8.45 |
| 2030 | 146019 | -481.5 | -8.31 |
| 2031 | 146131 | -479.6 | -8.00 |
| 2032 | 146242 | -479.6 | -7.99 |
| 2033 | 146352 | -478.8 | -7.86 |

deutnat

|      |        |        |       |
|------|--------|--------|-------|
| 2034 | 146461 | -477.9 | -7.71 |
| 2035 | 146570 | -478.6 | -7.82 |
| 2036 | 146681 | -479.6 | -7.98 |
| 2037 | 146792 | -479.8 | -8.02 |
| 2038 | 146903 | -479.7 | -8.00 |
| 2039 | 147014 | -479   | -7.88 |
| 2040 | 147124 | -479.4 | -7.95 |
| 2041 | 147236 | -479.8 | -8.02 |
| 2042 | 147347 | -479.8 | -8.02 |
| 2043 | 147459 | -480.6 | -8.15 |
| 2044 | 147572 | -480   | -8.05 |
| 2045 | 147684 | -479.5 | -7.97 |
| 2046 | 147796 | -481.2 | -8.25 |
| 2047 | 147910 | -481.6 | -8.32 |
| 2048 | 148025 | -482.5 | -8.47 |
| 2049 | 148141 | -482.4 | -8.45 |
| 2050 | 148253 | -477.7 | -7.67 |
| 2051 | 148362 | -476.8 | -7.52 |
| 2052 | 148471 | -477.9 | -7.70 |
| 2053 | 148581 | -477.5 | -7.64 |
| 2054 | 148691 | -478.7 | -7.84 |
| 2055 | 148802 | -478.7 | -7.84 |
| 2056 | 148913 | -478   | -7.72 |
| 2057 | 149022 | -477.4 | -7.62 |
| 2058 | 149132 | -476.9 | -7.54 |
| 2059 | 149241 | -477.7 | -7.67 |
| 2060 | 149351 | -476.8 | -7.52 |
| 2061 | 149460 | -476.4 | -7.46 |
| 2062 | 149569 | -477.6 | -7.66 |
| 2063 | 149679 | -477.5 | -7.64 |
| 2064 | 149789 | -477.3 | -7.61 |
| 2065 | 149899 | -477.1 | -7.57 |
| 2066 | 150008 | -475.7 | -7.34 |
| 2067 | 150116 | -475.6 | -7.33 |
| 2068 | 150224 | -476.9 | -7.54 |
| 2069 | 150333 | -475.7 | -7.34 |
| 2070 | 150440 | -473.2 | -6.93 |
| 2071 | 150545 | -473.4 | -6.96 |
| 2072 | 150653 | -476.2 | -7.43 |
| 2073 | 150762 | -476.1 | -7.41 |
| 2074 | 150868 | -472.1 | -6.75 |
| 2075 | 150972 | -471.3 | -6.61 |
| 2076 | 151076 | -472.8 | -6.86 |
| 2077 | 151181 | -473.1 | -6.91 |
| 2078 | 151287 | -473.1 | -6.91 |
| 2079 | 151393 | -475   | -7.22 |
| 2080 | 151502 | -476.2 | -7.42 |
| 2081 | 151611 | -476   | -7.38 |
| 2082 | 151721 | -476.1 | -7.40 |
| 2083 | 151832 | -478.7 | -7.82 |
| 2084 | 151945 | -479.1 | -7.89 |
| 2085 | 152058 | -479.1 | -7.89 |
| 2086 | 152171 | -477.9 | -7.69 |
| 2087 | 152283 | -478.4 | -7.77 |
| 2088 | 152398 | -480.7 | -8.15 |

deutnat

|      |        |        |       |
|------|--------|--------|-------|
| 2089 | 152513 | -480.3 | -8.08 |
| 2090 | 152628 | -479   | -7.86 |
| 2091 | 152740 | -477.7 | -7.64 |
| 2092 | 152852 | -476.8 | -7.49 |
| 2093 | 152963 | -477.9 | -7.67 |
| 2094 | 153076 | -477.7 | -7.64 |
| 2095 | 153188 | -478.5 | -7.78 |
| 2096 | 153301 | -477.9 | -7.68 |
| 2097 | 153412 | -475.2 | -7.23 |
| 2098 | 153523 | -477.5 | -7.61 |
| 2099 | 153637 | -480.2 | -8.06 |
| 2100 | 153753 | -480.4 | -8.10 |
| 2101 | 153868 | -478.2 | -7.74 |
| 2102 | 153981 | -477.5 | -7.62 |
| 2103 | 154094 | -478.1 | -7.72 |
| 2104 | 154207 | -477.6 | -7.64 |
| 2105 | 154322 | -480.6 | -8.14 |
| 2106 | 154438 | -478.9 | -7.86 |
| 2107 | 154551 | -475.9 | -7.37 |
| 2108 | 154664 | -478.8 | -7.85 |
| 2109 | 154783 | -485.7 | -9.00 |
| 2110 | 154907 | -484.5 | -8.80 |
| 2111 | 155029 | -482.9 | -8.53 |
| 2112 | 155151 | -484.7 | -8.84 |
| 2113 | 155271 | -480   | -8.06 |
| 2114 | 155388 | -480.1 | -8.08 |
| 2115 | 155506 | -480.9 | -8.21 |
| 2116 | 155625 | -482   | -8.40 |
| 2117 | 155743 | -478.9 | -7.89 |
| 2118 | 155861 | -481.8 | -8.37 |
| 2119 | 155983 | -484.8 | -8.87 |
| 2120 | 156105 | -481.2 | -8.28 |
| 2121 | 156225 | -482.5 | -8.50 |
| 2122 | 156349 | -486   | -9.08 |
| 2123 | 156473 | -482.7 | -8.54 |
| 2124 | 156593 | -480.5 | -8.17 |
| 2125 | 156714 | -482.6 | -8.52 |
| 2126 | 156835 | -482.4 | -8.49 |
| 2127 | 156957 | -482.7 | -8.55 |
| 2128 | 157080 | -482.9 | -8.58 |
| 2129 | 157202 | -482.4 | -8.50 |
| 2130 | 157324 | -482.9 | -8.59 |
| 2131 | 157444 | -478.4 | -7.84 |
| 2132 | 157560 | -477.5 | -7.69 |
| 2133 | 157677 | -478.8 | -7.91 |
| 2134 | 157793 | -477.4 | -7.67 |
| 2135 | 157909 | -477.9 | -7.75 |
| 2136 | 158026 | -479   | -7.93 |
| 2137 | 158140 | -473.2 | -6.97 |
| 2138 | 158250 | -473   | -6.93 |
| 2139 | 158359 | -471.2 | -6.63 |
| 2140 | 158469 | -474.2 | -7.13 |
| 2141 | 158584 | -479.8 | -8.05 |
| 2142 | 158702 | -477.2 | -7.62 |
| 2143 | 158815 | -473.9 | -7.07 |

deutnat

|      |        |        |       |
|------|--------|--------|-------|
| 2144 | 158925 | -471.2 | -6.62 |
| 2145 | 159033 | -471.8 | -6.72 |
| 2146 | 159139 | -466.8 | -5.89 |
| 2147 | 159240 | -463.1 | -5.27 |
| 2148 | 159340 | -465.3 | -5.63 |
| 2149 | 159444 | -471   | -6.58 |
| 2150 | 159548 | -463.7 | -5.36 |
| 2151 | 159651 | -469.2 | -6.27 |
| 2152 | 159757 | -469.8 | -6.37 |
| 2153 | 159865 | -470.9 | -6.54 |
| 2154 | 159971 | -467.3 | -5.94 |
| 2155 | 160076 | -469.2 | -6.25 |
| 2156 | 160184 | -472.3 | -6.76 |
| 2157 | 160293 | -471.8 | -6.67 |
| 2158 | 160403 | -472.5 | -6.78 |
| 2159 | 160514 | -472.6 | -6.79 |
| 2160 | 160626 | -476.3 | -7.40 |
| 2161 | 160740 | -473   | -6.85 |
| 2162 | 160851 | -474.4 | -7.07 |
| 2163 | 160963 | -472.7 | -6.79 |
| 2164 | 161077 | -476.9 | -7.48 |
| 2165 | 161192 | -476.1 | -7.34 |
| 2166 | 161308 | -477.2 | -7.52 |
| 2167 | 161427 | -480   | -7.97 |
| 2168 | 161545 | -476.6 | -7.41 |
| 2169 | 161661 | -476.5 | -7.38 |
| 2170 | 161776 | -474.4 | -7.03 |
| 2171 | 161890 | -475.7 | -7.25 |
| 2172 | 162005 | -475.3 | -7.18 |
| 2173 | 162117 | -471.8 | -6.60 |
| 2174 | 162227 | -471.8 | -6.60 |
| 2175 | 162336 | -469.5 | -6.22 |
| 2176 | 162440 | -464.9 | -5.46 |
| 2177 | 162543 | -465.7 | -5.59 |
| 2178 | 162649 | -471.8 | -6.60 |
| 2179 | 162759 | -470.7 | -6.42 |
| 2180 | 162867 | -469   | -6.14 |
| 2181 | 162976 | -471.3 | -6.52 |
| 2182 | 163089 | -475.7 | -7.25 |
| 2183 | 163204 | -474.4 | -7.03 |
| 2184 | 163318 | -474.5 | -7.05 |
| 2185 | 163432 | -474.2 | -7.00 |
| 2186 | 163546 | -473.1 | -6.81 |
| 2187 | 163660 | -475.6 | -7.23 |
| 2188 | 163777 | -476.6 | -7.39 |
| 2189 | 163896 | -478.2 | -7.66 |
| 2190 | 164016 | -478.8 | -7.76 |
| 2191 | 164136 | -477.7 | -7.58 |
| 2192 | 164258 | -481.8 | -8.26 |
| 2193 | 164385 | -483   | -8.46 |
| 2194 | 164512 | -483.7 | -8.57 |
| 2195 | 164642 | -484.9 | -8.77 |
| 2196 | 164769 | -480.9 | -8.11 |
| 2197 | 164894 | -482   | -8.29 |
| 2198 | 165021 | -482.9 | -8.44 |

## deutnat

|      |        |        |       |
|------|--------|--------|-------|
| 2199 | 165148 | -482   | -8.30 |
| 2200 | 165274 | -482.1 | -8.31 |
| 2201 | 165399 | -479.1 | -7.82 |
| 2202 | 165522 | -480.1 | -7.98 |
| 2203 | 165646 | -481.2 | -8.17 |
| 2204 | 165774 | -483.6 | -8.57 |
| 2205 | 165903 | -483.4 | -8.53 |
| 2206 | 166029 | -480   | -7.97 |
| 2207 | 166155 | -482.8 | -8.44 |
| 2208 | 166284 | -482.5 | -8.39 |
| 2209 | 166411 | -480.9 | -8.12 |
| 2210 | 166537 | -482.2 | -8.34 |
| 2211 | 166662 | -478   | -7.65 |
| 2212 | 166785 | -479.5 | -7.90 |
| 2213 | 166909 | -479   | -7.82 |
| 2214 | 167035 | -482.8 | -8.45 |
| 2215 | 167164 | -481.6 | -8.25 |
| 2216 | 167290 | -480   | -7.99 |
| 2217 | 167414 | -478.6 | -7.76 |
| 2218 | 167539 | -479.8 | -7.96 |
| 2219 | 167664 | -479.8 | -7.96 |
| 2220 | 167790 | -480.3 | -8.05 |
| 2221 | 167915 | -479.3 | -7.89 |
| 2222 | 168039 | -477.3 | -7.56 |
| 2223 | 168159 | -474.7 | -7.13 |
| 2224 | 168276 | -471.8 | -6.65 |
| 2225 | 168391 | -471.6 | -6.62 |
| 2226 | 168506 | -473.3 | -6.90 |
| 2227 | 168623 | -472.1 | -6.71 |
| 2228 | 168739 | -473.5 | -6.94 |
| 2229 | 168857 | -474.1 | -7.05 |
| 2230 | 168974 | -471.3 | -6.59 |
| 2231 | 169088 | -469.7 | -6.33 |
| 2232 | 169201 | -469.7 | -6.33 |
| 2233 | 169314 | -469.4 | -6.29 |
| 2234 | 169425 | -466.5 | -5.81 |
| 2235 | 169531 | -462.1 | -5.08 |
| 2236 | 169638 | -466.6 | -5.83 |
| 2237 | 169750 | -470.4 | -6.47 |
| 2238 | 169866 | -472.8 | -6.87 |
| 2239 | 169983 | -471.2 | -6.61 |
| 2240 | 170101 | -473.6 | -7.01 |
| 2241 | 170221 | -475.3 | -7.30 |
| 2242 | 170340 | -471.7 | -6.71 |
| 2243 | 170455 | -468.8 | -6.23 |
| 2244 | 170568 | -467.7 | -6.05 |
| 2245 | 170683 | -472.5 | -6.85 |
| 2246 | 170803 | -474.9 | -7.25 |
| 2247 | 170922 | -471.1 | -6.61 |
| 2248 | 171040 | -473.5 | -7.01 |
| 2249 | 171165 | -479.3 | -7.97 |
| 2250 | 171289 | -473.5 | -7.00 |
| 2251 | 171405 | -468.4 | -6.16 |
| 2252 | 171519 | -469.1 | -6.27 |
| 2253 | 171638 | -476   | -7.41 |



## deutnat

|      |        |        |       |
|------|--------|--------|-------|
| 2254 | 171760 | -472.8 | -6.88 |
| 2255 | 171880 | -474   | -7.08 |
| 2256 | 172004 | -477.5 | -7.65 |
| 2257 | 172132 | -479.9 | -8.05 |
| 2258 | 172262 | -480.5 | -8.15 |
| 2259 | 172393 | -480.5 | -8.14 |
| 2260 | 172522 | -476.8 | -7.53 |
| 2261 | 172647 | -477   | -7.56 |
| 2262 | 172774 | -477.5 | -7.64 |
| 2263 | 172900 | -476.7 | -7.51 |
| 2264 | 173027 | -478   | -7.72 |
| 2265 | 173153 | -475.5 | -7.31 |
| 2266 | 173275 | -473   | -6.89 |
| 2267 | 173397 | -474.3 | -7.11 |
| 2268 | 173519 | -473.4 | -6.96 |
| 2269 | 173642 | -474.4 | -7.13 |
| 2270 | 173761 | -469.4 | -6.30 |
| 2271 | 173875 | -466   | -5.74 |
| 2272 | 173988 | -467   | -5.91 |
| 2273 | 174105 | -472.7 | -6.86 |
| 2274 | 174226 | -472   | -6.74 |
| 2275 | 174344 | -468.6 | -6.18 |
| 2276 | 174459 | -467.6 | -6.02 |
| 2277 | 174573 | -467.2 | -5.95 |
| 2278 | 174688 | -468   | -6.09 |
| 2279 | 174804 | -469.1 | -6.27 |
| 2280 | 174920 | -467   | -5.92 |
| 2281 | 175034 | -467.6 | -6.02 |
| 2282 | 175150 | -468.3 | -6.14 |
| 2283 | 175266 | -468.4 | -6.16 |
| 2284 | 175386 | -472.5 | -6.84 |
| 2285 | 175509 | -475   | -7.25 |
| 2286 | 175630 | -468   | -6.09 |
| 2287 | 175746 | -467.7 | -6.04 |
| 2288 | 175866 | -473.5 | -7.00 |
| 2289 | 175991 | -474.8 | -7.22 |
| 2290 | 176117 | -474.9 | -7.23 |
| 2291 | 176244 | -476.9 | -7.56 |
| 2292 | 176373 | -475.5 | -7.33 |
| 2293 | 176501 | -476.5 | -7.50 |
| 2294 | 176630 | -477   | -7.58 |
| 2295 | 176759 | -476.8 | -7.54 |
| 2296 | 176887 | -474.7 | -7.19 |
| 2297 | 177015 | -476.5 | -7.49 |
| 2298 | 177142 | -474   | -7.08 |
| 2299 | 177268 | -473.9 | -7.06 |
| 2300 | 177393 | -472.8 | -6.88 |
| 2301 | 177517 | -473.1 | -6.92 |
| 2302 | 177644 | -476   | -7.40 |
| 2303 | 177773 | -476.2 | -7.44 |
| 2304 | 177900 | -473.2 | -6.94 |
| 2305 | 178026 | -474   | -7.07 |
| 2306 | 178153 | -475.1 | -7.25 |
| 2307 | 178283 | -477.5 | -7.64 |
| 2308 | 178417 | -480.8 | -8.19 |

deutnat

|      |        |        |       |
|------|--------|--------|-------|
| 2309 | 178554 | -480.6 | -8.15 |
| 2310 | 178691 | -481.4 | -8.28 |
| 2311 | 178830 | -481.8 | -8.35 |
| 2312 | 178965 | -476.7 | -7.50 |
| 2313 | 179093 | -472.3 | -6.77 |
| 2314 | 179217 | -471.6 | -6.65 |
| 2315 | 179342 | -473.7 | -7.00 |
| 2316 | 179468 | -472.7 | -6.83 |
| 2317 | 179590 | -468.2 | -6.08 |
| 2318 | 179706 | -463.5 | -5.30 |
| 2319 | 179820 | -464.7 | -5.49 |
| 2320 | 179939 | -470.1 | -6.39 |
| 2321 | 180060 | -469.8 | -6.34 |
| 2322 | 180182 | -469.9 | -6.35 |
| 2323 | 180304 | -469.5 | -6.28 |
| 2324 | 180426 | -470.5 | -6.44 |
| 2325 | 180546 | -466.1 | -5.71 |
| 2326 | 180663 | -465.7 | -5.64 |
| 2327 | 180780 | -465.7 | -5.64 |
| 2328 | 180895 | -463.8 | -5.32 |
| 2329 | 181011 | -466.3 | -5.73 |
| 2330 | 181132 | -471.8 | -6.64 |
| 2331 | 181259 | -473.5 | -6.92 |
| 2332 | 181382 | -466.8 | -5.80 |
| 2333 | 181502 | -469.2 | -6.20 |
| 2334 | 181626 | -472.7 | -6.77 |
| 2335 | 181753 | -472.3 | -6.71 |
| 2336 | 181881 | -473.8 | -6.95 |
| 2337 | 182011 | -475.9 | -7.30 |
| 2338 | 182146 | -479.4 | -7.87 |
| 2339 | 182284 | -480.2 | -8.00 |
| 2340 | 182421 | -477.3 | -7.52 |
| 2341 | 182556 | -478.2 | -7.66 |
| 2342 | 182694 | -480.7 | -8.08 |
| 2343 | 182830 | -476   | -7.29 |
| 2344 | 182965 | -478.5 | -7.70 |
| 2345 | 183102 | -478.9 | -7.77 |
| 2346 | 183243 | -483.8 | -8.58 |
| 2347 | 183386 | -481   | -8.11 |
| 2348 | 183525 | -478.2 | -7.64 |
| 2349 | 183664 | -481.4 | -8.17 |
| 2350 | 183807 | -481.6 | -8.20 |
| 2351 | 183948 | -480.9 | -8.08 |
| 2352 | 184088 | -479.2 | -7.79 |
| 2353 | 184229 | -481.1 | -8.10 |
| 2354 | 184367 | -476.7 | -7.37 |
| 2355 | 184501 | -475.1 | -7.10 |
| 2356 | 184641 | -484.9 | -8.72 |
| 2357 | 184787 | -481.8 | -8.21 |
| 2358 | 184928 | -479.1 | -7.75 |
| 2359 | 185069 | -481.2 | -8.10 |
| 2360 | 185212 | -482   | -8.23 |
| 2361 | 185354 | -479.1 | -7.75 |
| 2362 | 185494 | -480.3 | -7.94 |
| 2363 | 185640 | -485   | -8.72 |

|      |        |        |       |
|------|--------|--------|-------|
| 2364 | 185788 | -483.6 | -8.49 |
| 2365 | 185931 | -478.5 | -7.64 |
| 2366 | 186071 | -480.1 | -7.90 |
| 2367 | 186213 | -480.6 | -7.98 |
| 2368 | 186356 | -480.4 | -7.95 |
| 2369 | 186499 | -481.6 | -8.14 |
| 2370 | 186642 | -478.8 | -7.68 |
| 2371 | 186784 | -481.3 | -8.09 |
| 2372 | 186927 | -480.4 | -7.94 |
| 2373 | 187067 | -476.9 | -7.36 |
| 2374 | 187204 | -476.4 | -7.27 |
| 2375 | 187343 | -479.3 | -7.75 |
| 2376 | 187486 | -481.7 | -8.14 |
| 2377 | 187630 | -479.5 | -7.78 |
| 2378 | 187770 | -477.4 | -7.42 |
| 2379 | 187907 | -475   | -7.01 |
| 2380 | 188042 | -475.2 | -7.03 |
| 2381 | 188181 | -480.3 | -7.87 |
| 2382 | 188324 | -480.2 | -7.84 |
| 2383 | 188467 | -479   | -7.63 |
| 2384 | 188609 | -480.8 | -7.92 |
| 2385 | 188752 | -478.4 | -7.51 |
| 2386 | 188892 | -478.2 | -7.46 |
| 2387 | 189030 | -476.1 | -7.10 |
| 2388 | 189165 | -473.4 | -6.64 |
| 2389 | 189297 | -472.5 | -6.48 |
| 2390 | 189431 | -476.2 | -7.08 |
| 2391 | 189568 | -475.9 | -7.02 |
| 2392 | 189702 | -473.6 | -6.63 |
| 2393 | 189832 | -470   | -6.02 |
| 2394 | 189961 | -471.6 | -6.27 |
| 2395 | 190092 | -473   | -6.49 |
| 2396 | 190222 | -470.1 | -6.00 |
| 2397 | 190348 | -467.8 | -5.61 |
| 2398 | 190469 | -463.2 | -4.84 |
| 2399 | 190587 | -463   | -4.79 |
| 2400 | 190705 | -462.6 | -4.72 |
| 2401 | 190822 | -461.4 | -4.51 |
| 2402 | 190934 | -456   | -3.60 |
| 2403 | 191043 | -456.5 | -3.68 |
| 2404 | 191156 | -462.3 | -4.63 |
| 2405 | 191276 | -465.7 | -5.18 |
| 2406 | 191398 | -466.8 | -5.35 |
| 2407 | 191522 | -467.8 | -5.51 |
| 2408 | 191647 | -468.1 | -5.55 |
| 2409 | 191771 | -467   | -5.36 |
| 2410 | 191895 | -467.7 | -5.46 |
| 2411 | 192018 | -464.8 | -4.97 |
| 2412 | 192138 | -464   | -4.83 |
| 2413 | 192258 | -465.2 | -5.02 |
| 2414 | 192382 | -468.2 | -5.51 |
| 2415 | 192509 | -470.3 | -5.85 |
| 2416 | 192638 | -471.3 | -6.01 |
| 2417 | 192768 | -471.1 | -5.97 |
| 2418 | 192895 | -467.4 | -5.35 |

deutnat

|      |        |        |       |
|------|--------|--------|-------|
| 2419 | 193022 | -470.4 | -5.84 |
| 2420 | 193152 | -472.7 | -6.21 |
| 2421 | 193285 | -473.1 | -6.28 |
| 2422 | 193421 | -476.2 | -6.78 |
| 2423 | 193556 | -473   | -6.25 |
| 2424 | 193687 | -469.6 | -5.68 |
| 2425 | 193816 | -470.9 | -5.89 |
| 2426 | 193946 | -470.9 | -5.88 |
| 2427 | 194075 | -469.4 | -5.63 |
| 2428 | 194201 | -466.8 | -5.19 |
| 2429 | 194324 | -464.5 | -4.80 |
| 2430 | 194444 | -462.9 | -4.53 |
| 2431 | 194565 | -465.5 | -4.96 |
| 2432 | 194687 | -464.5 | -4.79 |
| 2433 | 194806 | -461.2 | -4.23 |
| 2434 | 194926 | -466.3 | -5.07 |
| 2435 | 195051 | -467.2 | -5.22 |
| 2436 | 195175 | -465.3 | -4.90 |
| 2437 | 195298 | -464.8 | -4.81 |
| 2438 | 195420 | -465.5 | -4.92 |
| 2439 | 195546 | -468.9 | -5.48 |
| 2440 | 195676 | -471.3 | -5.88 |
| 2441 | 195808 | -471.8 | -5.95 |
| 2442 | 195940 | -470.8 | -5.78 |
| 2443 | 196071 | -470.5 | -5.73 |
| 2444 | 196202 | -469.7 | -5.59 |
| 2445 | 196332 | -470.5 | -5.72 |
| 2446 | 196463 | -470.5 | -5.72 |
| 2447 | 196593 | -468.9 | -5.45 |
| 2448 | 196722 | -468.5 | -5.37 |
| 2449 | 196846 | -463.2 | -4.49 |
| 2450 | 196965 | -460.5 | -4.04 |
| 2451 | 197086 | -465.5 | -4.86 |
| 2452 | 197211 | -467.4 | -5.17 |
| 2453 | 197338 | -466.2 | -4.97 |
| 2454 | 197462 | -465.1 | -4.79 |
| 2455 | 197587 | -465.6 | -4.87 |
| 2456 | 197711 | -465.4 | -4.83 |
| 2457 | 197833 | -462.2 | -4.30 |
| 2458 | 197954 | -463.3 | -4.48 |
| 2459 | 198075 | -460.8 | -4.07 |
| 2460 | 198192 | -459.5 | -3.85 |
| 2461 | 198309 | -459.2 | -3.80 |
| 2462 | 198426 | -459.3 | -3.81 |
| 2463 | 198542 | -458.5 | -3.68 |
| 2464 | 198656 | -455.6 | -3.20 |
| 2465 | 198768 | -456.2 | -3.29 |
| 2466 | 198881 | -454.9 | -3.08 |
| 2467 | 198992 | -454.2 | -2.96 |
| 2468 | 199104 | -456.7 | -3.37 |
| 2469 | 199220 | -459.5 | -3.84 |
| 2470 | 199337 | -458.2 | -3.62 |
| 2471 | 199452 | -456.9 | -3.40 |
| 2472 | 199567 | -458.3 | -3.63 |
| 2473 | 199682 | -455.5 | -3.17 |

## deutnat

|      |        |        |       |
|------|--------|--------|-------|
| 2474 | 199793 | -453.2 | -2.80 |
| 2475 | 199904 | -454.1 | -2.95 |
| 2476 | 200015 | -452.4 | -2.68 |
| 2477 | 200124 | -453   | -2.78 |
| 2478 | 200236 | -454.7 | -3.07 |
| 2479 | 200345 | -449.6 | -2.23 |
| 2480 | 200451 | -448.3 | -2.02 |
| 2481 | 200558 | -450.7 | -2.42 |
| 2482 | 200666 | -451   | -2.48 |
| 2483 | 200776 | -453   | -2.82 |
| 2484 | 200887 | -453.1 | -2.84 |
| 2485 | 200998 | -452.7 | -2.78 |
| 2486 | 201109 | -451.5 | -2.59 |
| 2487 | 201216 | -447.3 | -1.90 |
| 2488 | 201319 | -444.8 | -1.49 |
| 2489 | 201423 | -447.6 | -1.96 |
| 2490 | 201529 | -448.5 | -2.11 |
| 2491 | 201635 | -447.7 | -1.99 |
| 2492 | 201742 | -449.3 | -2.26 |
| 2493 | 201849 | -448.2 | -2.08 |
| 2494 | 201957 | -449.7 | -2.34 |
| 2495 | 202065 | -447.7 | -2.02 |
| 2496 | 202169 | -444.7 | -1.53 |
| 2497 | 202275 | -449.9 | -2.40 |
| 2498 | 202386 | -451   | -2.59 |
| 2499 | 202496 | -450.5 | -2.51 |
| 2500 | 202607 | -450.6 | -2.54 |
| 2501 | 202717 | -449.4 | -2.35 |
| 2502 | 202826 | -449   | -2.29 |
| 2503 | 202936 | -450.2 | -2.49 |
| 2504 | 203046 | -449.5 | -2.38 |
| 2505 | 203155 | -447   | -1.98 |
| 2506 | 203262 | -446.5 | -1.90 |
| 2507 | 203370 | -449.1 | -2.34 |
| 2508 | 203481 | -450.4 | -2.56 |
| 2509 | 203592 | -449.6 | -2.43 |
| 2510 | 203704 | -451.4 | -2.73 |
| 2511 | 203818 | -452.5 | -2.92 |
| 2512 | 203933 | -453.1 | -3.03 |
| 2513 | 204049 | -453.5 | -3.10 |
| 2514 | 204164 | -451.1 | -2.71 |
| 2515 | 204278 | -451.9 | -2.84 |
| 2516 | 204394 | -454.3 | -3.25 |
| 2517 | 204512 | -453.8 | -3.17 |
| 2518 | 204629 | -452.4 | -2.94 |
| 2519 | 204743 | -450.1 | -2.56 |
| 2520 | 204857 | -451.4 | -2.78 |
| 2521 | 204973 | -453.7 | -3.17 |
| 2522 | 205092 | -456   | -3.55 |
| 2523 | 205214 | -456.8 | -3.69 |
| 2524 | 205336 | -456.7 | -3.68 |
| 2525 | 205458 | -456.4 | -3.63 |
| 2526 | 205582 | -458.3 | -3.95 |
| 2527 | 205708 | -460.1 | -4.25 |
| 2528 | 205836 | -460.7 | -4.35 |

deutnat

|      |        |        |       |
|------|--------|--------|-------|
| 2529 | 205965 | -461.3 | -4.45 |
| 2530 | 206097 | -464.3 | -4.95 |
| 2531 | 206232 | -464.9 | -5.05 |
| 2532 | 206366 | -462.6 | -4.67 |
| 2533 | 206496 | -460.9 | -4.39 |
| 2534 | 206627 | -462.3 | -4.62 |
| 2535 | 206759 | -462.5 | -4.65 |
| 2536 | 206890 | -460.2 | -4.27 |
| 2537 | 207019 | -460.8 | -4.37 |
| 2538 | 207149 | -460.3 | -4.29 |
| 2539 | 207278 | -460.4 | -4.31 |
| 2540 | 207409 | -461.5 | -4.49 |
| 2541 | 207540 | -460.8 | -4.37 |
| 2542 | 207671 | -461.4 | -4.47 |
| 2543 | 207803 | -461.7 | -4.51 |
| 2544 | 207933 | -459.3 | -4.11 |
| 2545 | 208061 | -458.8 | -4.02 |
| 2546 | 208191 | -460.8 | -4.35 |
| 2547 | 208319 | -456.9 | -3.70 |
| 2548 | 208445 | -457.6 | -3.81 |
| 2549 | 208571 | -456.8 | -3.68 |
| 2550 | 208696 | -456.3 | -3.59 |
| 2551 | 208821 | -456.4 | -3.60 |
| 2552 | 208946 | -456.1 | -3.55 |
| 2553 | 209072 | -457   | -3.70 |
| 2554 | 209195 | -453.2 | -3.06 |
| 2555 | 209315 | -452.1 | -2.88 |
| 2556 | 209436 | -453.9 | -3.17 |
| 2557 | 209560 | -456.2 | -3.55 |
| 2558 | 209686 | -457.3 | -3.73 |
| 2559 | 209812 | -455.8 | -3.48 |
| 2560 | 209938 | -456.4 | -3.58 |
| 2561 | 210062 | -453.4 | -3.07 |
| 2562 | 210182 | -450   | -2.51 |
| 2563 | 210300 | -450.8 | -2.64 |
| 2564 | 210418 | -451   | -2.67 |
| 2565 | 210538 | -452.5 | -2.91 |
| 2566 | 210659 | -451.8 | -2.79 |
| 2567 | 210777 | -449   | -2.33 |
| 2568 | 210893 | -447.9 | -2.14 |
| 2569 | 211009 | -448.3 | -2.21 |
| 2570 | 211127 | -450.9 | -2.64 |
| 2571 | 211246 | -451.1 | -2.67 |
| 2572 | 211366 | -450.5 | -2.56 |
| 2573 | 211485 | -450.3 | -2.53 |
| 2574 | 211603 | -448.8 | -2.28 |
| 2575 | 211721 | -450.8 | -2.61 |
| 2576 | 211842 | -452   | -2.80 |
| 2577 | 211960 | -447.2 | -2.00 |
| 2578 | 212075 | -447.4 | -2.03 |
| 2579 | 212190 | -446.1 | -1.81 |
| 2580 | 212305 | -448.3 | -2.17 |
| 2581 | 212422 | -447.7 | -2.07 |
| 2582 | 212538 | -447.5 | -2.03 |
| 2583 | 212653 | -445.2 | -1.65 |

## deutnat

|      |        |        |       |
|------|--------|--------|-------|
| 2584 | 212766 | -445.1 | -1.63 |
| 2585 | 212881 | -447.8 | -2.07 |
| 2586 | 212996 | -445.3 | -1.65 |
| 2587 | 213109 | -444.4 | -1.50 |
| 2588 | 213223 | -447.2 | -1.96 |
| 2589 | 213338 | -446   | -1.76 |
| 2590 | 213453 | -445.5 | -1.67 |
| 2591 | 213567 | -446.4 | -1.82 |
| 2592 | 213684 | -447.8 | -2.06 |
| 2593 | 213799 | -444.1 | -1.45 |
| 2594 | 213911 | -443.5 | -1.35 |
| 2595 | 214024 | -444.9 | -1.58 |
| 2596 | 214138 | -444.4 | -1.50 |
| 2597 | 214251 | -443.8 | -1.40 |
| 2598 | 214364 | -443.8 | -1.41 |
| 2599 | 214478 | -445   | -1.61 |
| 2600 | 214592 | -444.8 | -1.58 |
| 2601 | 214706 | -443.5 | -1.36 |
| 2602 | 214819 | -443   | -1.29 |
| 2603 | 214932 | -443.6 | -1.39 |
| 2604 | 215047 | -445.2 | -1.67 |
| 2605 | 215161 | -443.5 | -1.40 |
| 2606 | 215274 | -442.5 | -1.24 |
| 2607 | 215386 | -441.1 | -1.02 |
| 2608 | 215497 | -440.4 | -0.91 |
| 2609 | 215608 | -442.2 | -1.22 |
| 2610 | 215723 | -445.3 | -1.74 |
| 2611 | 215839 | -443.5 | -1.45 |
| 2612 | 215955 | -445.5 | -1.79 |
| 2613 | 216075 | -448.4 | -2.28 |
| 2614 | 216197 | -449   | -2.39 |
| 2615 | 216319 | -447.3 | -2.11 |
| 2616 | 216439 | -447.4 | -2.14 |
| 2617 | 216560 | -447.1 | -2.10 |
| 2618 | 216678 | -442.8 | -1.39 |
| 2619 | 216792 | -440.7 | -1.05 |
| 2620 | 216904 | -440.2 | -0.97 |
| 2621 | 217018 | -441.7 | -1.23 |
| 2622 | 217131 | -440.7 | -1.07 |
| 2623 | 217244 | -439.4 | -0.86 |
| 2624 | 217356 | -440.3 | -1.02 |
| 2625 | 217470 | -440.9 | -1.13 |
| 2626 | 217584 | -441.3 | -1.20 |
| 2627 | 217699 | -441.1 | -1.18 |
| 2628 | 217817 | -447.1 | -2.18 |
| 2629 | 217939 | -446.2 | -2.04 |
| 2630 | 218060 | -445   | -1.85 |
| 2631 | 218181 | -445.7 | -1.97 |
| 2632 | 218303 | -446.3 | -2.08 |
| 2633 | 218426 | -447   | -2.20 |
| 2634 | 218551 | -449.5 | -2.62 |
| 2635 | 218681 | -453.1 | -3.23 |
| 2636 | 218814 | -452.9 | -3.20 |
| 2637 | 218946 | -451.3 | -2.94 |
| 2638 | 219076 | -451   | -2.90 |

|      |        |        |       |
|------|--------|--------|-------|
| 2639 | 219207 | -451.4 | -2.98 |
| 2640 | 219339 | -452.5 | -3.17 |
| 2641 | 219472 | -453.5 | -3.35 |
| 2642 | 219605 | -450.4 | -2.84 |
| 2643 | 219738 | -453.8 | -3.42 |
| 2644 | 219878 | -459.5 | -4.37 |
| 2645 | 220023 | -459.1 | -4.31 |
| 2646 | 220167 | -458.5 | -4.23 |
| 2647 | 220312 | -459.7 | -4.43 |
| 2648 | 220461 | -463   | -4.99 |
| 2649 | 220613 | -462   | -4.84 |
| 2650 | 220761 | -459   | -4.35 |
| 2651 | 220907 | -459.8 | -4.49 |
| 2652 | 221058 | -463   | -5.03 |
| 2653 | 221210 | -462.1 | -4.89 |
| 2654 | 221363 | -462.4 | -4.95 |
| 2655 | 221520 | -467.4 | -5.78 |
| 2656 | 221684 | -469.8 | -6.19 |
| 2657 | 221850 | -468.7 | -6.02 |
| 2658 | 222015 | -468.9 | -6.06 |
| 2659 | 222182 | -469.8 | -6.21 |
| 2660 | 222355 | -474.9 | -7.07 |
| 2661 | 222535 | -476.2 | -7.29 |
| 2662 | 222711 | -471.3 | -6.49 |
| 2663 | 222885 | -473   | -6.78 |
| 2664 | 223062 | -474.5 | -7.02 |
| 2665 | 223240 | -473.7 | -6.89 |
| 2666 | 223420 | -476.2 | -7.30 |
| 2667 | 223605 | -478.2 | -7.63 |
| 2668 | 223792 | -478   | -7.60 |
| 2669 | 223979 | -477.7 | -7.55 |
| 2670 | 224164 | -476.6 | -7.36 |
| 2671 | 224351 | -478.3 | -7.64 |
| 2672 | 224536 | -475.6 | -7.19 |
| 2673 | 224716 | -472.4 | -6.66 |
| 2674 | 224888 | -467.8 | -5.89 |
| 2675 | 225058 | -469.8 | -6.22 |
| 2676 | 225229 | -469.7 | -6.20 |
| 2677 | 225399 | -467.8 | -5.88 |
| 2678 | 225562 | -462.5 | -4.99 |
| 2679 | 225726 | -468.4 | -5.96 |
| 2680 | 225900 | -472.2 | -6.59 |
| 2681 | 226072 | -467   | -5.72 |
| 2682 | 226238 | -466.2 | -5.58 |
| 2683 | 226408 | -469.8 | -6.17 |
| 2684 | 226582 | -470.8 | -6.33 |
| 2685 | 226758 | -472.1 | -6.53 |
| 2686 | 226939 | -475.2 | -7.04 |
| 2687 | 227128 | -479.2 | -7.70 |
| 2688 | 227321 | -478.8 | -7.62 |
| 2689 | 227512 | -476.3 | -7.19 |
| 2690 | 227699 | -475.9 | -7.12 |
| 2691 | 227883 | -474.1 | -6.81 |
| 2692 | 228064 | -472.3 | -6.50 |
| 2693 | 228241 | -469.4 | -6.01 |



## deutnat

|      |        |        |       |
|------|--------|--------|-------|
| 2694 | 228416 | -470.6 | -6.19 |
| 2695 | 228596 | -474.4 | -6.81 |
| 2696 | 228783 | -477.6 | -7.33 |
| 2697 | 228974 | -477.7 | -7.34 |
| 2698 | 229165 | -476.9 | -7.19 |
| 2699 | 229354 | -475.9 | -7.01 |
| 2700 | 229541 | -475.2 | -6.89 |
| 2701 | 229726 | -474.2 | -6.71 |
| 2702 | 229909 | -472.1 | -6.34 |
| 2703 | 230088 | -471   | -6.15 |
| 2704 | 230264 | -469.3 | -5.85 |
| 2705 | 230440 | -471.3 | -6.17 |
| 2706 | 230618 | -470   | -5.94 |
| 2707 | 230794 | -470.2 | -5.96 |
| 2708 | 230972 | -471.1 | -6.09 |
| 2709 | 231146 | -466.8 | -5.37 |
| 2710 | 231315 | -465.6 | -5.15 |
| 2711 | 231482 | -465.2 | -5.07 |
| 2712 | 231649 | -464.7 | -4.98 |
| 2713 | 231815 | -464.5 | -4.93 |
| 2714 | 231979 | -462.2 | -4.54 |
| 2715 | 232140 | -461.3 | -4.38 |
| 2716 | 232299 | -460.4 | -4.21 |
| 2717 | 232458 | -460.9 | -4.29 |
| 2718 | 232617 | -460.2 | -4.16 |
| 2719 | 232774 | -458.8 | -3.91 |
| 2720 | 232930 | -458.2 | -3.80 |
| 2721 | 233083 | -456.1 | -3.44 |
| 2722 | 233236 | -457.5 | -3.66 |
| 2723 | 233390 | -457.9 | -3.71 |
| 2724 | 233542 | -455.2 | -3.26 |
| 2725 | 233691 | -452.9 | -2.87 |
| 2726 | 233836 | -451.2 | -2.59 |
| 2727 | 233979 | -449.6 | -2.33 |
| 2728 | 234122 | -452.3 | -2.78 |
| 2729 | 234268 | -451.6 | -2.66 |
| 2730 | 234411 | -448.9 | -2.22 |
| 2731 | 234552 | -448.9 | -2.22 |
| 2732 | 234694 | -449.1 | -2.25 |
| 2733 | 234837 | -451.5 | -2.65 |
| 2734 | 234984 | -452.2 | -2.77 |
| 2735 | 235129 | -450.2 | -2.44 |
| 2736 | 235271 | -447.1 | -1.93 |
| 2737 | 235411 | -447   | -1.92 |
| 2738 | 235552 | -448.9 | -2.24 |
| 2739 | 235694 | -448.2 | -2.13 |
| 2740 | 235836 | -448   | -2.11 |
| 2741 | 235977 | -446.6 | -1.89 |
| 2742 | 236114 | -443.9 | -1.45 |
| 2743 | 236250 | -443.6 | -1.40 |
| 2744 | 236385 | -441.8 | -1.11 |
| 2745 | 236518 | -442.1 | -1.17 |
| 2746 | 236652 | -441.9 | -1.15 |
| 2747 | 236785 | -440.6 | -0.94 |
| 2748 | 236916 | -438.5 | -0.60 |

## deutnat

|      |        |        |       |
|------|--------|--------|-------|
| 2749 | 237043 | -434.2 | 0.10  |
| 2750 | 237166 | -433.8 | 0.16  |
| 2751 | 237288 | -431.8 | 0.48  |
| 2752 | 237410 | -432.5 | 0.36  |
| 2753 | 237529 | -428.4 | 1.03  |
| 2754 | 237643 | -424.1 | 1.73  |
| 2755 | 237755 | -424   | 1.74  |
| 2756 | 237866 | -422.4 | 1.99  |
| 2757 | 237975 | -421.1 | 2.20  |
| 2758 | 238084 | -421.7 | 2.09  |
| 2759 | 238194 | -422.8 | 1.90  |
| 2760 | 238306 | -423.6 | 1.75  |
| 2761 | 238419 | -424.1 | 1.66  |
| 2762 | 238532 | -424.7 | 1.55  |
| 2763 | 238647 | -426.1 | 1.30  |
| 2764 | 238764 | -427.1 | 1.12  |
| 2765 | 238883 | -427.8 | 0.99  |
| 2766 | 239003 | -429.5 | 0.69  |
| 2767 | 239125 | -430.2 | 0.56  |
| 2768 | 239248 | -430.7 | 0.46  |
| 2769 | 239375 | -434.4 | -0.18 |
| 2770 | 239506 | -436.5 | -0.54 |
| 2771 | 239642 | -440.9 | -1.29 |
| 2772 | 239784 | -443.6 | -1.76 |
| 2773 | 239931 | -446.2 | -2.22 |
| 2774 | 240080 | -445.5 | -2.12 |
| 2775 | 240231 | -448.2 | -2.59 |
| 2776 | 240387 | -451.1 | -3.09 |
| 2777 | 240548 | -453   | -3.43 |
| 2778 | 240711 | -453.6 | -3.55 |
| 2779 | 240877 | -455.3 | -3.85 |
| 2780 | 241048 | -457.1 | -4.17 |
| 2781 | 241224 | -460.9 | -4.82 |
| 2782 | 241406 | -463.3 | -5.23 |
| 2783 | 241596 | -466.6 | -5.80 |
| 2784 | 241792 | -469   | -6.21 |
| 2785 | 241991 | -468.3 | -6.10 |
| 2786 | 242187 | -466.8 | -5.86 |
| 2787 | 242382 | -466.4 | -5.80 |
| 2788 | 242576 | -466   | -5.74 |
| 2789 | 242770 | -465.4 | -5.65 |
| 2790 | 242959 | -461.6 | -5.02 |
| 2791 | 243144 | -461   | -4.93 |
| 2792 | 243330 | -462.5 | -5.18 |
| 2793 | 243519 | -464.2 | -5.46 |
| 2794 | 243714 | -467   | -5.93 |
| 2795 | 243916 | -469.7 | -6.38 |
| 2796 | 244124 | -472.4 | -6.82 |
| 2797 | 244337 | -473.1 | -6.94 |
| 2798 | 244551 | -473.6 | -7.02 |
| 2799 | 244767 | -473.9 | -7.07 |
| 2800 | 244983 | -473.3 | -6.97 |
| 2801 | 245196 | -471.8 | -6.72 |
| 2802 | 245407 | -471   | -6.58 |
| 2803 | 245618 | -471.8 | -6.71 |

deutnat

|      |        |        |       |
|------|--------|--------|-------|
| 2804 | 245834 | -474.7 | -7.19 |
| 2805 | 246053 | -474   | -7.07 |
| 2806 | 246269 | -472.8 | -6.86 |
| 2807 | 246485 | -472.6 | -6.83 |
| 2808 | 246700 | -472.3 | -6.78 |
| 2809 | 246917 | -474.1 | -7.07 |
| 2810 | 247135 | -473.2 | -6.92 |
| 2811 | 247351 | -471.3 | -6.60 |
| 2812 | 247566 | -472.4 | -6.78 |
| 2813 | 247785 | -474.5 | -7.13 |
| 2814 | 248007 | -474.5 | -7.13 |
| 2815 | 248229 | -474.3 | -7.10 |
| 2816 | 248453 | -475.9 | -7.36 |
| 2817 | 248680 | -476.2 | -7.41 |
| 2818 | 248907 | -475.2 | -7.24 |
| 2819 | 249128 | -472.3 | -6.76 |
| 2820 | 249345 | -470.8 | -6.51 |
| 2821 | 249560 | -470.6 | -6.48 |
| 2822 | 249772 | -468.4 | -6.11 |
| 2823 | 249984 | -470.1 | -6.39 |
| 2824 | 250199 | -470.9 | -6.52 |
| 2825 | 250413 | -468.8 | -6.17 |
| 2826 | 250618 | -463.6 | -5.31 |
| 2827 | 250818 | -463.5 | -5.29 |
| 2828 | 251021 | -466.1 | -5.72 |
| 2829 | 251231 | -469.8 | -6.34 |
| 2830 | 251448 | -470.7 | -6.48 |
| 2831 | 251666 | -470.8 | -6.50 |
| 2832 | 251883 | -469.3 | -6.25 |
| 2833 | 252102 | -472.6 | -6.79 |
| 2834 | 252329 | -474.8 | -7.16 |
| 2835 | 252553 | -470.8 | -6.49 |
| 2836 | 252769 | -467.9 | -6.01 |
| 2837 | 252986 | -471.2 | -6.55 |
| 2838 | 253213 | -474.7 | -7.13 |
| 2839 | 253442 | -473.5 | -6.93 |
| 2840 | 253670 | -473.2 | -6.88 |
| 2841 | 253896 | -471.7 | -6.63 |
| 2842 | 254121 | -472.4 | -6.75 |
| 2843 | 254345 | -470.6 | -6.45 |
| 2844 | 254560 | -465.5 | -5.60 |
| 2845 | 254767 | -462.7 | -5.14 |
| 2846 | 254972 | -464.3 | -5.41 |
| 2847 | 255183 | -466.4 | -5.77 |
| 2848 | 255399 | -468.7 | -6.16 |
| 2849 | 255620 | -470.1 | -6.39 |
| 2850 | 255844 | -470.3 | -6.43 |
| 2851 | 256068 | -469.8 | -6.36 |
| 2852 | 256294 | -471.8 | -6.69 |
| 2853 | 256525 | -473.3 | -6.95 |
| 2854 | 256759 | -473.2 | -6.93 |
| 2855 | 256994 | -474.4 | -7.13 |
| 2856 | 257234 | -476.1 | -7.42 |
| 2857 | 257479 | -477.1 | -7.58 |
| 2858 | 257726 | -477.8 | -7.70 |

## deutnat

|      |        |        |       |
|------|--------|--------|-------|
| 2859 | 257975 | -478.7 | -7.85 |
| 2860 | 258224 | -476.6 | -7.50 |
| 2861 | 258471 | -477.6 | -7.67 |
| 2862 | 258723 | -479.7 | -8.01 |
| 2863 | 258978 | -479.5 | -7.98 |
| 2864 | 259235 | -480.2 | -8.09 |
| 2865 | 259492 | -480   | -8.05 |
| 2866 | 259750 | -479.6 | -7.99 |
| 2867 | 260009 | -481.5 | -8.30 |
| 2868 | 260272 | -481.6 | -8.31 |
| 2869 | 260536 | -481.3 | -8.26 |
| 2870 | 260801 | -482.9 | -8.52 |
| 2871 | 261069 | -482.4 | -8.43 |
| 2872 | 261336 | -482.4 | -8.43 |
| 2873 | 261602 | -481   | -8.19 |
| 2874 | 261865 | -480.8 | -8.16 |
| 2875 | 262131 | -482.4 | -8.42 |
| 2876 | 262399 | -481.7 | -8.30 |
| 2877 | 262665 | -481.2 | -8.21 |
| 2878 | 262933 | -482.5 | -8.42 |
| 2879 | 263201 | -480.8 | -8.13 |
| 2880 | 263466 | -480.5 | -8.08 |
| 2881 | 263732 | -481.9 | -8.30 |
| 2882 | 264004 | -483.3 | -8.53 |
| 2883 | 264273 | -479.7 | -7.93 |
| 2884 | 264533 | -477.3 | -7.52 |
| 2885 | 264792 | -479.4 | -7.86 |
| 2886 | 265055 | -479.4 | -7.85 |
| 2887 | 265321 | -481.1 | -8.13 |
| 2888 | 265595 | -483.8 | -8.57 |
| 2889 | 265865 | -479.1 | -7.78 |
| 2890 | 266123 | -475.5 | -7.18 |
| 2891 | 266380 | -478.1 | -7.61 |
| 2892 | 266643 | -479   | -7.75 |
| 2893 | 266905 | -477.8 | -7.54 |
| 2894 | 267167 | -478.5 | -7.66 |
| 2895 | 267431 | -478.5 | -7.65 |
| 2896 | 267692 | -476.3 | -7.28 |
| 2897 | 267946 | -473.8 | -6.86 |
| 2898 | 268194 | -472.2 | -6.59 |
| 2899 | 268435 | -468.4 | -5.96 |
| 2900 | 268677 | -472.4 | -6.61 |
| 2901 | 268926 | -473.4 | -6.77 |
| 2902 | 269178 | -473.8 | -6.84 |
| 2903 | 269429 | -472.7 | -6.65 |
| 2904 | 269678 | -472.4 | -6.59 |
| 2905 | 269926 | -471.7 | -6.47 |
| 2906 | 270169 | -468.6 | -5.95 |
| 2907 | 270409 | -469   | -6.00 |
| 2908 | 270648 | -467.8 | -5.80 |
| 2909 | 270883 | -465.7 | -5.44 |
| 2910 | 271114 | -464.9 | -5.30 |
| 2911 | 271347 | -467.1 | -5.65 |
| 2912 | 271584 | -467.7 | -5.74 |
| 2913 | 271822 | -467.3 | -5.65 |

deutnat

|      |        |        |       |
|------|--------|--------|-------|
| 2914 | 272053 | -462.3 | -4.80 |
| 2915 | 272276 | -461.2 | -4.60 |
| 2916 | 272500 | -463.2 | -4.90 |
| 2917 | 272724 | -461.8 | -4.65 |
| 2918 | 272946 | -460.6 | -4.43 |
| 2919 | 273166 | -460.3 | -4.35 |
| 2920 | 273385 | -460.3 | -4.33 |
| 2921 | 273605 | -460.4 | -4.33 |
| 2922 | 273827 | -461.8 | -4.55 |
| 2923 | 274048 | -459.2 | -4.10 |
| 2924 | 274263 | -457.7 | -3.84 |
| 2925 | 274477 | -457.6 | -3.80 |
| 2926 | 274692 | -458.6 | -3.95 |
| 2927 | 274909 | -458.7 | -3.95 |
| 2928 | 275127 | -459.8 | -4.13 |
| 2929 | 275344 | -457.5 | -3.73 |
| 2930 | 275559 | -457.4 | -3.71 |
| 2931 | 275772 | -456.4 | -3.53 |
| 2932 | 275983 | -455.5 | -3.38 |
| 2933 | 276195 | -456.2 | -3.48 |
| 2934 | 276409 | -457.1 | -3.62 |
| 2935 | 276622 | -455.5 | -3.35 |
| 2936 | 276830 | -452.7 | -2.88 |
| 2937 | 277036 | -453.5 | -3.01 |
| 2938 | 277246 | -455.5 | -3.33 |
| 2939 | 277460 | -457.2 | -3.61 |
| 2940 | 277680 | -459.3 | -3.95 |
| 2941 | 277903 | -459.6 | -4.00 |
| 2942 | 278130 | -462.3 | -4.44 |
| 2943 | 278361 | -462.4 | -4.46 |
| 2944 | 278593 | -462.2 | -4.44 |
| 2945 | 278825 | -462.1 | -4.43 |
| 2946 | 279057 | -462.1 | -4.44 |
| 2947 | 279292 | -463.4 | -4.67 |
| 2948 | 279533 | -465.9 | -5.10 |
| 2949 | 279781 | -468.2 | -5.49 |
| 2950 | 280038 | -472.2 | -6.17 |
| 2951 | 280303 | -472.2 | -6.18 |
| 2952 | 280564 | -469.1 | -5.69 |
| 2953 | 280817 | -466.6 | -5.30 |
| 2954 | 281071 | -468.6 | -5.66 |
| 2955 | 281332 | -471.2 | -6.11 |
| 2956 | 281602 | -473.4 | -6.50 |
| 2957 | 281875 | -472.6 | -6.39 |
| 2958 | 282143 | -469.9 | -5.96 |
| 2959 | 282405 | -468.1 | -5.67 |
| 2960 | 282661 | -464.9 | -5.15 |
| 2961 | 282910 | -463   | -4.85 |
| 2962 | 283160 | -465.2 | -5.22 |
| 2963 | 283417 | -467.1 | -5.55 |
| 2964 | 283677 | -467   | -5.54 |
| 2965 | 283941 | -469.4 | -5.95 |
| 2966 | 284218 | -474.7 | -6.83 |
| 2967 | 284508 | -477.3 | -7.27 |
| 2968 | 284804 | -477.5 | -7.30 |

deutnat

|      |        |        |       |
|------|--------|--------|-------|
| 2969 | 285102 | -478.4 | -7.45 |
| 2970 | 285398 | -475.6 | -6.99 |
| 2971 | 285686 | -473   | -6.57 |
| 2972 | 285968 | -472   | -6.40 |
| 2973 | 286248 | -471.2 | -6.27 |
| 2974 | 286525 | -470.2 | -6.10 |
| 2975 | 286802 | -470.6 | -6.15 |
| 2976 | 287079 | -469.5 | -5.96 |
| 2977 | 287351 | -467.5 | -5.62 |
| 2978 | 287617 | -465.5 | -5.28 |
| 2979 | 287879 | -464.4 | -5.09 |
| 2980 | 288145 | -468   | -5.68 |
| 2981 | 288418 | -468.8 | -5.80 |
| 2982 | 288698 | -472.1 | -6.34 |
| 2983 | 288986 | -473.1 | -6.50 |
| 2984 | 289271 | -470.5 | -6.06 |
| 2985 | 289549 | -468.2 | -5.67 |
| 2986 | 289823 | -467.6 | -5.56 |
| 2987 | 290100 | -470.3 | -6.00 |
| 2988 | 290382 | -470.4 | -6.00 |
| 2989 | 290660 | -466.8 | -5.39 |
| 2990 | 290929 | -465.4 | -5.15 |
| 2991 | 291193 | -462.5 | -4.65 |
| 2992 | 291455 | -464.3 | -4.93 |
| 2993 | 291721 | -465.2 | -5.07 |
| 2994 | 291986 | -462.6 | -4.62 |
| 2995 | 292242 | -459.7 | -4.13 |
| 2996 | 292490 | -456.1 | -3.52 |
| 2997 | 292732 | -455.8 | -3.46 |
| 2998 | 292976 | -457.1 | -3.67 |
| 2999 | 293232 | -463.7 | -4.76 |
| 3000 | 293502 | -466.5 | -5.22 |
| 3001 | 293779 | -467.3 | -5.34 |
| 3002 | 294060 | -468.9 | -5.60 |
| 3003 | 294348 | -471.7 | -6.06 |
| 3004 | 294637 | -468.7 | -5.56 |
| 3005 | 294919 | -467.4 | -5.34 |
| 3006 | 295198 | -466.2 | -5.13 |
| 3007 | 295474 | -465.2 | -4.96 |
| 3008 | 295749 | -465.1 | -4.94 |
| 3009 | 296020 | -462.9 | -4.57 |
| 3010 | 296289 | -462.7 | -4.53 |
| 3011 | 296562 | -465.8 | -5.04 |
| 3012 | 296840 | -465.1 | -4.92 |
| 3013 | 297116 | -464.5 | -4.81 |
| 3014 | 297393 | -465.1 | -4.90 |
| 3015 | 297669 | -463.9 | -4.70 |
| 3016 | 297943 | -463.2 | -4.57 |
| 3017 | 298215 | -462.7 | -4.48 |
| 3018 | 298485 | -461   | -4.20 |
| 3019 | 298749 | -458.7 | -3.81 |
| 3020 | 299012 | -460.1 | -4.04 |
| 3021 | 299275 | -458   | -3.69 |
| 3022 | 299533 | -456.6 | -3.45 |
| 3023 | 299788 | -455   | -3.19 |

deutnat

|      |        |        |       |
|------|--------|--------|-------|
| 3024 | 300039 | -454.4 | -3.08 |
| 3025 | 300293 | -455.5 | -3.26 |
| 3026 | 300547 | -454.7 | -3.13 |
| 3027 | 300799 | -453.7 | -2.97 |
| 3028 | 301052 | -454.9 | -3.17 |
| 3029 | 301305 | -453.4 | -2.92 |
| 3030 | 301560 | -455.8 | -3.32 |
| 3031 | 301813 | -451   | -2.52 |
| 3032 | 302061 | -452.4 | -2.76 |
| 3033 | 302320 | -457.7 | -3.64 |
| 3034 | 302583 | -455   | -3.19 |
| 3035 | 302834 | -449.5 | -2.28 |
| 3036 | 303077 | -448   | -2.04 |
| 3037 | 303316 | -446.2 | -1.74 |
| 3038 | 303558 | -449.8 | -2.34 |
| 3039 | 303810 | -453   | -2.88 |
| 3040 | 304068 | -453.9 | -3.03 |
| 3041 | 304333 | -456.5 | -3.46 |
| 3042 | 304606 | -459   | -3.88 |
| 3043 | 304886 | -460.5 | -4.13 |
| 3044 | 305171 | -461.6 | -4.32 |
| 3045 | 305463 | -464.6 | -4.82 |
| 3046 | 305764 | -466.5 | -5.14 |
| 3047 | 306073 | -468.2 | -5.42 |
| 3048 | 306386 | -468.9 | -5.54 |
| 3049 | 306698 | -466.5 | -5.14 |
| 3050 | 307005 | -466.2 | -5.09 |
| 3051 | 307309 | -464   | -4.72 |
| 3052 | 307608 | -463.2 | -4.58 |
| 3053 | 307908 | -463.9 | -4.69 |
| 3054 | 308206 | -462.2 | -4.41 |
| 3055 | 308500 | -460.3 | -4.09 |
| 3056 | 308789 | -459.5 | -3.95 |
| 3057 | 309077 | -459   | -3.86 |
| 3058 | 309365 | -458.8 | -3.83 |
| 3059 | 309651 | -458   | -3.69 |
| 3060 | 309934 | -456.2 | -3.39 |
| 3061 | 310215 | -455.8 | -3.32 |
| 3062 | 310493 | -454.3 | -3.06 |
| 3063 | 310766 | -452.6 | -2.78 |
| 3064 | 311035 | -451.2 | -2.54 |
| 3065 | 311302 | -450.4 | -2.39 |
| 3066 | 311568 | -450.1 | -2.33 |
| 3067 | 311832 | -449.5 | -2.22 |
| 3068 | 312099 | -450.9 | -2.45 |
| 3069 | 312367 | -450.4 | -2.35 |
| 3070 | 312634 | -450.1 | -2.29 |
| 3071 | 312899 | -447.9 | -1.92 |
| 3072 | 313159 | -447.2 | -1.79 |
| 3073 | 313418 | -446.2 | -1.61 |
| 3074 | 313674 | -444.7 | -1.34 |
| 3075 | 313928 | -445   | -1.38 |
| 3076 | 314183 | -445   | -1.36 |
| 3077 | 314438 | -444.8 | -1.32 |
| 3078 | 314692 | -443.6 | -1.10 |

deutnat

|      |        |        |       |
|------|--------|--------|-------|
| 3079 | 314943 | -443   | -0.99 |
| 3080 | 315194 | -443   | -0.97 |
| 3081 | 315443 | -441.1 | -0.64 |
| 3082 | 315689 | -440.3 | -0.48 |
| 3083 | 315934 | -440.3 | -0.46 |
| 3084 | 316179 | -440.7 | -0.51 |
| 3085 | 316424 | -438.8 | -0.18 |
| 3086 | 316666 | -438.9 | -0.18 |
| 3087 | 316910 | -439.9 | -0.33 |
| 3088 | 317155 | -439.2 | -0.20 |
| 3089 | 317401 | -440.4 | -0.39 |
| 3090 | 317649 | -440.6 | -0.42 |
| 3091 | 317897 | -439   | -0.14 |
| 3092 | 318141 | -438.4 | -0.03 |
| 3093 | 318385 | -438.1 | 0.02  |
| 3094 | 318628 | -437   | 0.20  |
| 3095 | 318872 | -438.1 | 0.01  |
| 3096 | 319118 | -437.9 | 0.02  |
| 3097 | 319364 | -436.9 | 0.16  |
| 3098 | 319608 | -436.3 | 0.24  |
| 3099 | 319853 | -436.7 | 0.15  |
| 3100 | 320102 | -438.2 | -0.12 |
| 3101 | 320354 | -438.4 | -0.18 |
| 3102 | 320607 | -437.7 | -0.09 |
| 3103 | 320856 | -434.7 | 0.38  |
| 3104 | 321095 | -430   | 1.14  |
| 3105 | 321329 | -429.1 | 1.26  |
| 3106 | 321559 | -426.5 | 1.66  |
| 3107 | 321783 | -423.2 | 2.18  |
| 3108 | 322000 | -420.2 | 2.65  |
| 3109 | 322214 | -418.8 | 2.85  |
| 3110 | 322426 | -418.7 | 2.82  |
| 3111 | 322638 | -416.2 | 3.19  |
| 3112 | 322847 | -415.9 | 3.18  |
| 3113 | 323057 | -416.2 | 3.08  |
| 3114 | 323269 | -415.8 | 3.08  |
| 3115 | 323482 | -414.9 | 3.14  |
| 3116 | 323695 | -415.2 | 2.99  |
| 3117 | 323911 | -415.5 | 2.84  |
| 3118 | 324129 | -414.8 | 2.86  |
| 3119 | 324349 | -415.6 | 2.65  |
| 3120 | 324574 | -417.2 | 2.34  |
| 3121 | 324804 | -419   | 2.00  |
| 3122 | 325039 | -420.3 | 1.74  |
| 3123 | 325278 | -421   | 1.59  |
| 3124 | 325527 | -426.3 | 0.68  |
| 3125 | 325789 | -430   | 0.05  |
| 3126 | 326061 | -431.7 | -0.25 |
| 3127 | 326342 | -435.9 | -0.96 |
| 3128 | 326639 | -440.5 | -1.73 |
| 3129 | 326952 | -444.4 | -2.39 |
| 3130 | 327273 | -444.5 | -2.41 |
| 3131 | 327597 | -445.4 | -2.55 |
| 3132 | 327924 | -445.9 | -2.64 |
| 3133 | 328258 | -448.3 | -3.03 |



deutnat

|      |        |        |       |
|------|--------|--------|-------|
| 3134 | 328602 | -450.6 | -3.41 |
| 3135 | 328955 | -452.3 | -3.68 |
| 3136 | 329318 | -455.6 | -4.21 |
| 3137 | 329694 | -457.8 | -4.56 |
| 3138 | 330081 | -459.9 | -4.90 |
| 3139 | 330476 | -461.4 | -5.11 |
| 3140 | 330883 | -465   | -5.67 |
| 3141 | 331300 | -465.8 | -5.76 |
| 3142 | 331725 | -467.8 | -6.06 |
| 3143 | 332164 | -471.5 | -6.63 |
| 3144 | 332624 | -475.8 | -7.30 |
| 3145 | 333106 | -479.4 | -7.86 |
| 3146 | 333602 | -480.7 | -8.04 |
| 3147 | 334101 | -480.3 | -7.94 |
| 3148 | 334600 | -480.4 | -7.93 |
| 3149 | 335100 | -480.1 | -7.87 |
| 3150 | 335595 | -478.4 | -7.58 |
| 3151 | 336081 | -476.6 | -7.28 |
| 3152 | 336567 | -477.5 | -7.43 |
| 3153 | 337055 | -476.7 | -7.30 |
| 3154 | 337544 | -477.4 | -7.42 |
| 3155 | 338033 | -475.8 | -7.16 |
| 3156 | 338521 | -476.6 | -7.30 |
| 3157 | 339015 | -477.2 | -7.40 |
| 3158 | 339505 | -474.6 | -6.98 |
| 3159 | 339993 | -475.5 | -7.13 |
| 3160 | 340490 | -477.3 | -7.44 |
| 3161 | 340984 | -473.9 | -6.88 |
| 3162 | 341462 | -470.4 | -6.31 |
| 3163 | 341930 | -470   | -6.26 |
| 3164 | 342401 | -470.3 | -6.32 |
| 3165 | 342879 | -471.8 | -6.59 |
| 3166 | 343364 | -472   | -6.64 |
| 3167 | 343853 | -472.6 | -6.76 |
| 3168 | 344348 | -473   | -6.84 |
| 3169 | 344839 | -470.5 | -6.43 |
| 3170 | 345327 | -471.3 | -6.58 |
| 3171 | 345821 | -471.7 | -6.65 |
| 3172 | 346319 | -472.3 | -6.76 |
| 3173 | 346823 | -472.8 | -6.84 |
| 3174 | 347330 | -472.7 | -6.83 |
| 3175 | 347841 | -473.3 | -6.92 |
| 3176 | 348357 | -474.1 | -7.05 |
| 3177 | 348877 | -473.9 | -7.02 |
| 3178 | 349404 | -475.8 | -7.32 |
| 3179 | 349945 | -477.6 | -7.61 |
| 3180 | 350493 | -477.8 | -7.64 |
| 3181 | 351044 | -477.9 | -7.64 |
| 3182 | 351596 | -477.5 | -7.57 |
| 3183 | 352150 | -478   | -7.64 |
| 3184 | 352710 | -478.9 | -7.77 |
| 3185 | 353273 | -478.6 | -7.71 |
| 3186 | 353838 | -478.7 | -7.71 |
| 3187 | 354400 | -477.3 | -7.46 |
| 3188 | 354958 | -477.1 | -7.41 |

## deutnat

|      |        |        |       |
|------|--------|--------|-------|
| 3189 | 355512 | -475.5 | -7.13 |
| 3190 | 356060 | -474.5 | -6.94 |
| 3191 | 356612 | -476.4 | -7.24 |
| 3192 | 357167 | -475.1 | -7.01 |
| 3193 | 357712 | -472.6 | -6.58 |
| 3194 | 358247 | -471.6 | -6.39 |
| 3195 | 358786 | -473.2 | -6.64 |
| 3196 | 359327 | -471.9 | -6.41 |
| 3197 | 359855 | -468.3 | -5.80 |
| 3198 | 360376 | -468.9 | -5.89 |
| 3199 | 360904 | -469.9 | -6.05 |
| 3200 | 361440 | -471.1 | -6.24 |
| 3201 | 361973 | -468.4 | -5.79 |
| 3202 | 362503 | -469.1 | -5.90 |
| 3203 | 363042 | -470.9 | -6.20 |
| 3204 | 363580 | -468   | -5.72 |
| 3205 | 364114 | -468.7 | -5.84 |
| 3206 | 364659 | -470.9 | -6.21 |
| 3207 | 365208 | -468.9 | -5.88 |
| 3208 | 365743 | -466   | -5.40 |
| 3209 | 366267 | -464.3 | -5.13 |
| 3210 | 366784 | -462.5 | -4.84 |
| 3211 | 367297 | -462.6 | -4.86 |
| 3212 | 367816 | -463.3 | -4.97 |
| 3213 | 368329 | -460.2 | -4.46 |
| 3214 | 368829 | -457.6 | -4.03 |
| 3215 | 369331 | -460.7 | -4.54 |
| 3216 | 369858 | -464.9 | -5.23 |
| 3217 | 370403 | -466.1 | -5.42 |
| 3218 | 370960 | -468.1 | -5.74 |
| 3219 | 371545 | -473.8 | -6.67 |
| 3220 | 372149 | -473.3 | -6.58 |
| 3221 | 372746 | -470.8 | -6.15 |
| 3222 | 373331 | -469.4 | -5.90 |
| 3223 | 373909 | -468   | -5.66 |
| 3224 | 374478 | -466.1 | -5.33 |
| 3225 | 375042 | -465.8 | -5.26 |
| 3226 | 375604 | -464.8 | -5.08 |
| 3227 | 376155 | -461.7 | -4.55 |
| 3228 | 376690 | -458.9 | -4.07 |
| 3229 | 377204 | -454.2 | -3.27 |
| 3230 | 377702 | -452.6 | -2.99 |
| 3231 | 378210 | -457.1 | -3.72 |
| 3232 | 378743 | -460.6 | -4.29 |
| 3233 | 379297 | -462.7 | -4.63 |
| 3234 | 379864 | -464.3 | -4.88 |
| 3235 | 380435 | -463.1 | -4.68 |
| 3236 | 380997 | -461   | -4.32 |
| 3237 | 381551 | -459.4 | -4.05 |
| 3238 | 382095 | -457.4 | -3.72 |
| 3239 | 382622 | -452.6 | -2.92 |
| 3240 | 383134 | -451.4 | -2.72 |
| 3241 | 383641 | -450.1 | -2.50 |
| 3242 | 384159 | -454.5 | -3.24 |
| 3243 | 384710 | -459.6 | -4.10 |

deutnat

|      |        |        |       |
|------|--------|--------|-------|
| 3244 | 385288 | -462.2 | -4.54 |
| 3245 | 385894 | -467.1 | -5.36 |
| 3246 | 386528 | -468.8 | -5.65 |
| 3247 | 387167 | -467.6 | -5.46 |
| 3248 | 387804 | -467.2 | -5.40 |
| 3249 | 388435 | -464.8 | -5.02 |
| 3250 | 389061 | -465.1 | -5.07 |
| 3251 | 389700 | -467.3 | -5.44 |
| 3252 | 390349 | -466.7 | -5.34 |
| 3253 | 390999 | -466.8 | -5.36 |
| 3254 | 391658 | -468.3 | -5.60 |
| 3255 | 392317 | -465.7 | -5.17 |
| 3256 | 392972 | -466.6 | -5.31 |
| 3257 | 393636 | -467.2 | -5.40 |
| 3258 | 394297 | -465   | -5.02 |
| 3259 | 394935 | -460.3 | -4.23 |
| 3260 | 395543 | -455.6 | -3.43 |
| 3261 | 396126 | -451.9 | -2.80 |
| 3262 | 396694 | -450.5 | -2.54 |
| 3263 | 397253 | -448.6 | -2.20 |
| 3264 | 397808 | -448.3 | -2.13 |
| 3265 | 398361 | -447.2 | -1.92 |
| 3266 | 398909 | -445.9 | -1.68 |
| 3267 | 399455 | -445.9 | -1.65 |
| 3268 | 400003 | -446   | -1.64 |
| 3269 | 400553 | -445.8 | -1.58 |
| 3270 | 401097 | -443.5 | -1.17 |
| 3271 | 401636 | -443.2 | -1.09 |
| 3272 | 402179 | -444.4 | -1.26 |
| 3273 | 402728 | -444.4 | -1.23 |
| 3274 | 403276 | -443.3 | -1.01 |
| 3275 | 403815 | -440.9 | -0.58 |
| 3276 | 404346 | -439.8 | -0.37 |
| 3277 | 404874 | -439.5 | -0.28 |
| 3278 | 405401 | -438.6 | -0.10 |
| 3279 | 405923 | -437.1 | 0.18  |
| 3280 | 406441 | -436.5 | 0.31  |
| 3281 | 406957 | -435.6 | 0.49  |
| 3282 | 407469 | -434.4 | 0.71  |
| 3283 | 407977 | -433.7 | 0.85  |
| 3284 | 408485 | -433.3 | 0.94  |
| 3285 | 408992 | -432.3 | 1.12  |
| 3286 | 409496 | -431.4 | 1.28  |
| 3287 | 409995 | -429.3 | 1.64  |
| 3288 | 410483 | -426.4 | 2.13  |
| 3289 | 410979 | -431.6 | 1.27  |
| 3290 | 411492 | -431.2 | 1.34  |
| 3291 | 412009 | -431.9 | 1.23  |
| 3292 | 412533 | -432.4 | 1.15  |
| 3293 | 413062 | -432.8 | 1.08  |
| 3294 | 413601 | -434.5 | 0.80  |
| 3295 | 414147 | -434.2 | 0.85  |
| 3296 | 414692 | -432.8 | 1.07  |
| 3297 | 415235 | -432.2 | 1.16  |
| 3298 | 415781 | -432.3 | 1.13  |

deutnat

|      |        |        |      |
|------|--------|--------|------|
| 3299 | 416327 | -431.1 | 1.32 |
| 3300 | 416872 | -430.8 | 1.36 |
| 3301 | 417419 | -430.3 | 1.43 |
| 3302 | 417969 | -430.4 | 1.40 |
| 3303 | 418526 | -431.1 | 1.27 |
| 3304 | 419095 | -433   | 0.94 |
| 3305 | 419682 | -435.5 | 0.51 |
| 3306 | 420281 | -435.2 | 0.54 |
| 3307 | 420888 | -436.4 | 0.32 |
| 3308 | 421507 | -437.3 | 0.15 |
| 3309 | 422135 | -437.6 | 0.08 |
| 3310 | 422766 | -436.6 | 0.23 |
